# Supplementary material for: Effects of a Volatile Organic Compound Filter on Breath Profiles Measured by Secondary Electrospray High-Resolution Mass Spectrometry
Source: MDPI journal article supplement (doi:10.3390/molecules28010045), 2022-12-21
Supplement: s1 [file s1]

# Supplementary material - Effects of a volatile organic compound filter on breath profiles measured by secondary electrospray high-resolution mass spectrometry

Ronja Weber<sup>1</sup>, Jérôme Kaeslin<sup>2</sup>, Sophia Moeller<sup>1</sup>, Nathan Perkins<sup>3</sup>, Srdjan Micic<sup>1\*</sup>, Alexander Moeller<sup>1,4,\*</sup>

<sup>1</sup> Department of Respiratory Medicine and Childhood Research Center, University Children's Hospital Zurich, Steinwiesstrasse 75, 8032 Zurich, Switzerland

<sup>2</sup> Department of Chemistry and Applied Biosciences, Swiss Federal Institute of Technology, Vladimir-Prelog Weg 3, 8093 Zurich, Switzerland

<sup>3</sup> Division of Clinical Chemistry and Biochemistry, University Children's Hospital Zurich, Steinwiesstrasse 75, 8032 Zurich, Switzerland

<sup>4</sup> Faculty of Medicine, University of Zurich, Raemistrasse 71, 8006 Zurich, Switzerland

\* These authors contributed equally to this work.

Corresponding authors:

Alexander Moeller  
Steinwiesstrasse 75  
8032 Zurich  
Switzerland  
+41(0)442667079  
[alexander.moeller@kispi.uzh.ch](mailto:alexander.moeller@kispi.uzh.ch)

Srdjan Micic  
Steinwiesstrasse 75  
8032 Zurich  
Switzerland  
+41(0)442667079  
[srdjan.micic@kispi.uzh.ch](mailto:srdjan.micic@kispi.uzh.ch)

# 1. Supplementary information

## 1.1 Data pre-processing

The following section serves as a summary of the raw mass spectra processing pipeline as already implemented in our previous work [1–3].

The recorded raw mass spectra were aligned using the proprietary PeakView software (Version 2.2, Applied Biosystems Sciex, Toronto, ON, Canada) and afterwards converted from the proprietary wiff file format into the open file standard mzXML, using the MSConvert (Version 3, ProteoWizard Tools, Palo Alto, CA, US). Further processing was done in R v4.1.1 (R Foundation for Statistical Computing, Vienna, Austria). Piecewise cubic Hermite interpolation was applied to resample the mass spectra associated with the measurements without filter usage onto a linearly spaced  $m/z$ -axis with a  $\Delta m/z$  step-size of 0.0005. Subsequently, trapezoidal integration was applied to compute the total ion chromatograms (TIC), which were subsequently used to distinguish the mass spectral scans corresponding to exhaled breath from the ones of the breaks between exhalations.

Peak picking was done for each subject individually on the mass spectrum averaged over all scans corresponding to exhalations where signal-to-noise ratio (SNR) was set to 2 with Friedman's super smoother calculated over the mass spectrum. As a next step, the peak positions across the different participants were combined into a single list, from which a kernel density estimate (Gaussian kernel, bandwidth = 0.0025) was calculated. The local maxima of the smoothed density function were used to compensate for small variations in the peak positions and to define the final list of  $m/z$  features that are representative for all measurements. Centroiding was performed by trapezoidal integration (mass window  $m/z \pm \Delta m/z$ ,  $\Delta m/z = 0.0025$ ), which yielded time traces of  $m/z$  feature intensities for each sample.  $m/z$  features which were not associated with exhalation manoeuvres were eliminated by a simple linear regression model, which was built for each measurement between the standardised TIC and the standardised time trace of the individual  $m/z$  features. In case the estimated slope was  $< 0$ , the  $m/z$  features were not included in the final list. As an additional filtering parameter to restrict the number of included features to the ones associated with exhalations, the ratio of the sum of squares of the predicted values by the simple linear regression model of the  $m/z$  feature over the scans and the sum of squares of the standardised TIC was used. For both positive and negative ionization mode, 0.5 was determined as the minimal threshold for the ratio. Lastly, in order to eliminate features that were not consistently present across all samples, only  $m/z$  features which were present in at least 80% of all measurements were included for further processing steps. The signal intensities of the remaining  $m/z$  features were calculated by averaging over scans corresponding to exhalations and log2 transformed. The features were then depicted in the mass spectra recorded without filter usage and arranged into a matrix  $2n \times k$  matrix where  $n$  is the number of participants and  $k$  is the number of  $m/z$  features.

In the same manner, the humid air samples were processed to obtain a list of features and their log2 intensities coming from the ambient air. Additionally, features with the raw intensity of 50 counts per second (cps) and lower were excluded from the list. Matching of the  $m/z$  features found in human breath samples was done based on peak position differences. The threshold of 10 ppm and lower was used to find the matching features in both groups (human samples and humid air samples).

## 2. Supplementary tables

### 2.1 Table S1

List of all studied metabolites including their concordance correlation coefficient, location shift and bias from Bland-Altman analysis.

| Mod. | <i>m/z</i> | Compound                        | Formula  | Ion.       | CCC  | LSt   | BA bias | Elev. in  | Amb. air | Ref.  |
|------|------------|---------------------------------|----------|------------|------|-------|---------|-----------|----------|-------|
| neg  | 129.0915   | Heptanoic acid                  | C7H14O2  | [M-H]-     | 0.51 | -1.18 | -0.79   | No filter | Yes      | [4]   |
| neg  | 143.107    | Octanoic acid                   | C8H16O2  | [M-H]-     | 0.56 | -1.14 | -0.86   | No filter | Yes      | [4]   |
| pos  | 127.111    | 2-Octenal                       | C8H14O   | [M+H]+     | 0.57 | -1.04 | -0.87   | No filter | Yes      | [5,6] |
| pos  | 55.039     | Water trimer                    | H2O      | [M3+H]+    | 0.63 | 0.47  | 0.12    | Filter    | Yes      | -     |
| pos  | 253.2145   | 4-Hydroxy-2,6-hexadecadienal    | C16H28O2 | [M+H]+     | 0.83 | -0.15 | -0.13   | No filter | Yes      | [5,6] |
| pos  | 143.106    | 4-Hydroxy-2-octenal             | C8H14O2  | [M+H]+     | 0.83 | -0.51 | -0.23   | No filter | Yes      | [5,6] |
| neg  | 199.134    | $\omega$ -Oxoundecanoic acid    | C11H20O3 | [M-H]-     | 0.85 | -0.51 | -0.52   | No filter | No       | [7]   |
| pos  | 116.07     | Proline                         | C5H9NO2  | [M+H]+     | 0.88 | -0.29 | -0.14   | No filter | Yes      | [8]   |
| neg  | 157.087    | $\omega$ -Oxo-octanoic acid     | C8H14O3  | [M-H]-     | 0.89 | -0.47 | -0.41   | No filter | Yes      | [7]   |
| neg  | 159.1025   | $\omega$ -Hydroxy-octanoic acid | C8H14O3  | [M-H]-     | 0.89 | -0.45 | -0.41   | No filter | No       | [7]   |
| pos  | 76.039     | Glycine                         | C2H5NO   | [M+H]+     | 0.89 | 0.13  | 0.06    | Filter    | No       | [8]   |
| pos  | 166.0865   | Phenylalanine                   | C9H11NO2 | [M+H]+     | 0.91 | -0.31 | -0.20   | No filter | No       | [8]   |
| pos  | 77.0595    | Acetone + H2O                   | C3H6O    | [M+H2O+H]+ | 0.91 | 0.29  | 0.21    | Filter    | Yes      | -     |
| pos  | 211.169    | 4-Hydroxy-2,6-tridecadienal     | C13H22O2 | [M+H]+     | 0.91 | -0.34 | -0.15   | No filter | Yes      | [5,6] |
| neg  | 130.998    | Oxaloacetic acid                | C4H4O5   | [M-H]-     | 0.91 | 0.11  | 0.08    | Filter    | No       | [9]   |
| pos  | 59.049     | Acetone                         | C3H6O    | [M+H]+     | 0.91 | 0.36  | 0.28    | Filter    | No       | [10]  |
| neg  | 157.123    | Nonanoic acid                   | C9H18O2  | [M-H]-     | 0.92 | -0.32 | -0.42   | No filter | Yes      | [4]   |
| pos  | 197.1535   | 4-Hydroxy-2,6-dodecadienal      | C12H20O2 | [M+H]+     | 0.92 | -0.15 | -0.08   | No filter | Yes      | [5,6] |
| neg  | 173.0815   | Octanedioic acid                | C8H14O4  | [M-H]-     | 0.92 | -0.35 | -0.31   | No filter | Yes      | [11]  |
| neg  | 143.071    | $\omega$ -Oxoheptanoic acid     | C7H12O3  | [M-H]-     | 0.92 | -0.34 | -0.29   | No filter | Yes      | [7]   |
| neg  | 115.076    | Hexanoic acid                   | C6H12O2  | [M-H]-     | 0.93 | -0.25 | -0.27   | No filter | Yes      | [12]  |
| pos  | 171.1375   | 4-Hydroxy-2-decenal             | C10H18O2 | [M+H]+     | 0.93 | -0.31 | -0.22   | No filter | Yes      | [5,6] |
| pos  | 157.122    | 4-Hydroxy-2-nonenal             | C9H16O2  | [M+H]+     | 0.93 | -0.27 | -0.15   | No filter | Yes      | [5,6] |
| pos  | 239.2      | 4-Hydroxy-2,6-pentadecadienal   | C15H26O2 | [M+H]+     | 0.93 | 0.12  | 0.06    | Filter    | Yes      | [5,6] |
| neg  | 129.055    | $\omega$ -Oxohexanoic acid      | C6H10O3  | [M-H]-     | 0.94 | -0.28 | -0.20   | No filter | Yes      | [7]   |
| pos  | 213.1845   | 4-Hydroxy-2-tridecenal          | C13H24O2 | [M+H]+     | 0.94 | -0.22 | -0.16   | No filter | Yes      | [5,6] |

|     |          |                                |           |         |      |       |       |           |     |       |
|-----|----------|--------------------------------|-----------|---------|------|-------|-------|-----------|-----|-------|
| neg | 145.05   | Hexanedioic acid               | C6H10O4   | [M-H]-  | 0.94 | -0.02 | -0.01 | No filter | No  | [7]   |
| pos | 227.2005 | 4-Hydroxy-2-tetradecenal       | C14H26O2  | [M+H]+  | 0.94 | -0.06 | -0.03 | No filter | Yes | [5,6] |
| pos | 225.1845 | 4-Hydroxy-2,6-tetradecadienal  | C14H24O2  | [M+H]+  | 0.94 | -0.12 | -0.06 | No filter | Yes | [5,6] |
| neg | 159.066  | Heptanedioic acid              | C7H12O4   | [M-H]-  | 0.94 | -0.27 | -0.27 | No filter | No  | [7]   |
| pos | 199.1695 | 4-Hydroxy-2-dodecenal          | C12H22O2  | [M+H]+  | 0.94 | -0.19 | -0.09 | No filter | Yes | [5,6] |
| neg | 173.118  | $\omega$ -Hydroxynonanoic acid | C9H18O3   | [M-H]-  | 0.94 | -0.27 | -0.33 | No filter | Yes | [7]   |
| pos | 90.0545  | Alanine                        | C3H7NO2   | [M+H]+  | 0.94 | -0.03 | -0.02 | No filter | No  | [8]   |
| neg | 171.102  | $\omega$ -Oxononanoic acid     | C9H16O3   | [M-H]-  | 0.95 | -0.26 | -0.34 | No filter | Yes | [7]   |
| pos | 185.153  | 4-Hydroxy-2-undecenal          | C11H20O2  | [M+H]+  | 0.95 | -0.27 | -0.13 | No filter | Yes | [5,6] |
| pos | 132.1015 | (Iso)leucine                   | C6H13NO2  | [M+H]+  | 0.95 | -0.21 | -0.17 | No filter | Yes | [8]   |
| pos | 104.07   | Aminobutanoate                 | C4H9NO2   | [M+H]+  | 0.95 | -0.15 | -0.09 | No filter | No  | [11]  |
| pos | 141.1265 | 2-Nonenal                      | C9H16O    | [M+H]+  | 0.95 | -0.13 | -0.11 | No filter | Yes | [5,6] |
| neg | 187.097  | Nonanedioic acid               | C9H16O4   | [M-H]-  | 0.95 | -0.22 | -0.28 | No filter | No  | [7]   |
| pos | 183.1375 | 4-Hydroxy-2,6-undecadienal     | C11H18O2  | [M+H]+  | 0.95 | -0.14 | -0.08 | No filter | Yes | [5,6] |
| neg | 91.0035  | Formic acid dimer              | CH2O2     | [M2-H]- | 0.96 | 0.10  | 0.03  | Filter    | Yes | -     |
| neg | 115.003  | Fumaric acid                   | C4H4O4    | [M-H]-  | 0.96 | 0.05  | 0.04  | Filter    | No  | [9]   |
| neg | 185.118  | $\omega$ -Oxodecanoic acid     | C10H18O3  | [M-H]-  | 0.96 | -0.18 | -0.24 | No filter | Yes | [7]   |
| pos | 218.1385 | Propionylcarnitine             | C10H19NO4 | [M+H]+  | 0.96 | -0.17 | -0.13 | No filter | No  | [11]  |
| pos | 141.09   | 4-Hydroxy-2,6-octadienal       | C8H12O2   | [M+H]+  | 0.97 | -0.10 | -0.06 | No filter | Yes | [5,6] |
| pos | 118.065  | Indole                         | C8H7N     | [M+H]+  | 0.97 | 0.15  | 0.21  | Filter    | No  | [10]  |
| neg | 117.019  | Succinic acid                  | C4H6O4    | [M-H]-  | 0.97 | -0.03 | -0.03 | No filter | No  | [9]   |
| neg | 133.014  | Malic acid                     | C4H6O5    | [M-H]-  | 0.97 | -0.03 | -0.02 | No filter | No  | [9]   |
| pos | 183.174  | 2-Dodecenal                    | C12H22O   | [M+H]+  | 0.97 | -0.06 | -0.04 | No filter | Yes | [5,6] |
| neg | 131.0345 | Pentanedioic acid              | C5H8O4    | [M-H]-  | 0.97 | -0.08 | -0.07 | No filter | No  | [7]   |
| pos | 204.123  | Acetylcarnitine                | C9H17NO4  | [M+H]+  | 0.97 | -0.13 | -0.11 | No filter | No  | [11]  |
| neg | 167.0195 | Uric acid                      | C5H4N4O3  | [M-H]-  | 0.97 | -0.10 | -0.09 | No filter | No  | [13]  |
| pos | 211.2055 | 2-Tetradecenal                 | C14H26O   | [M+H]+  | 0.97 | 0.04  | 0.03  | Filter    | Yes | [5,6] |
| neg | 101.06   | Pentanoic acid                 | C5H10O2   | [M-H]-  | 0.97 | 0.03  | 0.04  | Filter    | Yes | [12]  |
| neg | 145.014  | $\alpha$ -Ketoglutaric acid    | C5H6O5    | [M-H]-  | 0.97 | -0.03 | -0.02 | No filter | Yes | [9]   |
| pos | 169.1585 | 2-Undecenal                    | C11H20O   | [M+H]+  | 0.97 | -0.08 | -0.07 | No filter | Yes | [5,6] |
| pos | 239.2365 | 2-Hexadecenal                  | C16H30O   | [M+H]+  | 0.98 | 0.02  | 0.02  | Filter    | Yes | [5,6] |
| neg | 149.0455 | Pentose                        | C5H10O5   | [M-H]-  | 0.98 | 0.05  | 0.06  | Filter    | No  | [11]  |
| pos | 155.106  | 4-Hydroxy-2,6-nonadienal       | C9H14O2   | [M+H]+  | 0.98 | -0.09 | -0.05 | No filter | Yes | [5,6] |



|                   |          |                            |            |        |      |       |       |           |     |       |
|-------------------|----------|----------------------------|------------|--------|------|-------|-------|-----------|-----|-------|
| neg               | 173.0085 | Aconitic acid              | C6H6O6     | [M-H]- | 0.98 | -0.01 | -0.01 | No filter | No  | [7]   |
| neg               | 179.0555 | Hexose                     | C6H12O6    | [M-H]- | 0.98 | 0.03  | 0.05  | Filter    | No  | [11]  |
| pos               | 225.2215 | 2-Pentadecenal             | C15H28O    | [M+H]+ | 0.98 | 0.00  | 0.00  | Filter    | Yes | [5,6] |
| neg               | 181.071  | Hexitol                    | C6H14O6    | [M-H]- | 0.98 | 0.02  | 0.03  | Filter    | No  | [11]  |
| pos               | 118.0855 | Valine                     | C5H11NO2   | [M+H]+ | 0.98 | -0.03 | -0.03 | No filter | Yes | [8]   |
| pos               | 155.1425 | 2-Decenal                  | C10H18O    | [M+H]+ | 0.99 | 0.03  | 0.07  | Filter    | Yes | [5,6] |
| pos               | 169.122  | 4-Hydroxy-2,6-decadienal   | C10H16O2   | [M+H]+ | 0.99 | -0.01 | -0.01 | No filter | Yes | [5,6] |
| pos               | 197.1895 | 2-Tridecenal               | C13H24O    | [M+H]+ | 0.99 | 0.02  | 0.02  | Filter    | Yes | [5,6] |
| neg               | 183.004  | 2,4-Dinitrophenol          | C6H4N2O5   | [M-H]- | 0.99 | 0.05  | -0.05 | Filter    | No  | [13]  |
| neg               | 197.0205 | 2-Methyl-4,6-dinitrophenol | C7H6N2O5   | [M-H]- | 0.99 | -0.01 | -0.01 | No filter | No  | [13]  |
| Not found in data |          |                            |            |        |      |       |       |           |     |       |
| pos               | 69.0681  | Isoprene                   | C5H8       | [M+H]+ |      |       |       |           |     | [14]  |
| pos               | 106.0499 | Serine                     | C3H7NO3    | [M+H]+ |      |       |       |           |     | [8]   |
| pos               | 133.0607 | Asparagine                 | C4H8N2O3   | [M+H]+ |      |       |       |           |     | [8]   |
| pos               | 133.0971 | Ornithine                  | C5H12N2O2  | [M+H]+ |      |       |       |           |     | [8]   |
| pos               | 147.0764 | Glutamine                  | C5H10N2O3  | [M+H]+ |      |       |       |           |     | [8]   |
| pos               | 147.1128 | Lysine                     | C6H14N2O2  | [M+H]+ |      |       |       |           |     | [8]   |
| pos               | 175.1189 | Arginine                   | C6H14N4O2  | [M+H]+ |      |       |       |           |     | [8]   |
| pos               | 176.0706 | Indole-3-acetate           | C10H9NO2   | [M+H]+ |      |       |       |           |     | [15]  |
| pos               | 206.0812 | 5-Methoxyindoleacetate     | C11H11NO3  | [M+H]+ |      |       |       |           |     | [15]  |
| pos               | 225.087  | 3-Hydroxy-L-kynurenine     | C10H12N2O4 | [M+H]+ |      |       |       |           |     | [15]  |
| pos               | 241.2162 | 4-Hydroxy-2-pentadecenal   | C15H28O2   | [M+H]+ |      |       |       |           |     | [5,6] |
| pos               | 255.2319 | 4-Hydroxy-2-hexadecenal    | C16H30O2   | [M+H]+ |      |       |       |           |     | [5,6] |

Abbreviations: Mod. = Ionization mode, Ion. = Ionization, CCC = Concordance correlation coefficient, LS = Location shift, BA = Bland-Altman, Elev. in = Elevated in, Amb. air = Ambient air, Ref = Reference

## 2.2 Table S2

List of all studied contaminants including their concordance correlation coefficient, location shift and Bland-Altman bias.

| Mod. | m/z     | Compound     | Formula    | Ion.     | CCC  | LS    | BA bias | Elev. in  | Amb. air |
|------|---------|--------------|------------|----------|------|-------|---------|-----------|----------|
| pos  | 388.128 | Polysiloxane | [C2H6SiO]5 | [M+NH4]+ | 0.59 | -1.07 | 1.56    | No filter | Yes      |
| pos  | 60.044  | Acetamide    | C2H5NO     | [M+H]+   | 0.61 | -0.99 | 0.98    | No filter | Yes      |

|                   |          |                                 |                                             |                          |      |       |       |           |     |
|-------------------|----------|---------------------------------|---------------------------------------------|--------------------------|------|-------|-------|-----------|-----|
| pos               | 65.0595  | Methanol                        | CH3OH                                       | [M2+H] <sup>+</sup>      | 0.67 | -0.63 | 0.67  | No filter | Yes |
| pos               | 355.069  | Polysiloxane                    | [C2H6SiO]5                                  | [M+H-CH4] <sup>+</sup>   | 0.71 | -0.78 | 1.17  | No filter | Yes |
| pos               | 371.101  | Polysiloxane                    | [C2H6SiO]5                                  | [M+H] <sup>+</sup>       | 0.73 | -0.73 | 1.20  | No filter | Yes |
| pos               | 429.088  | Polysiloxane                    | [C2H6SiO]6                                  | [M+H-CH4] <sup>+</sup>   | 0.77 | -0.68 | 0.80  | No filter | Yes |
| pos               | 462.147  | Polysiloxane                    | [C2H6SiO]6                                  | [M+NH4] <sup>+</sup>     | 0.78 | -0.68 | 1.00  | No filter | Yes |
| pos               | 445.1195 | Polysiloxane                    | [C2H6SiO]6                                  | [M+H] <sup>+</sup>       | 0.85 | -0.50 | 0.68  | No filter | Yes |
| pos               | 149.023  | Fragment of phthalate esters    | C8H4O3                                      | [f+H] <sup>+</sup>       | 0.88 | 0.00  | 0.00  | Filter    | No  |
| pos               | 74.0595  | Dimethyl formamide              | C3H7NO                                      | [M+H] <sup>+</sup>       | 0.89 | -0.36 | 0.30  | No filter | Yes |
| pos               | 195.064  | Dimethyl phthalate              | C10H10O4                                    | [M+H] <sup>+</sup>       | 0.91 | -0.26 | 0.16  | No filter | Yes |
| pos               | 102.0545 | Acetonitrile/Acetic Acid        | (CH3CN) <sub>n</sub> (CH3COOH) <sub>m</sub> | [A1B1+H] <sup>+</sup>    | 0.93 | -0.20 | 0.08  | No filter | Yes |
| pos               | 279.1595 | Dibutylphthalate                | C16H22O4                                    | [M+H] <sup>+</sup>       | 0.93 | 0.15  | -0.12 | Filter    | Yes |
| pos               | 88.0385  | Acetonitrile/Formic Acid        | (CH3CN) <sub>n</sub> (HCOOH) <sub>m</sub>   | [A1B1+H] <sup>+</sup>    | 0.94 | 0.13  | -0.05 | Filter    | No  |
| neg               | 255.2325 | Palmitic acid                   | C16H32O2                                    | [M-H] <sup>-</sup>       | 0.96 | -0.19 | 0.24  | No filter | Yes |
| pos               | 79.0205  | Dimethylsulfoxide               | C2H6OS                                      | [M+H] <sup>+</sup>       | 0.97 | -0.09 | 0.08  | No filter | No  |
| neg               | 283.264  | Stearic acid                    | C18H36O2                                    | [M-H] <sup>-</sup>       | 0.97 | -0.19 | 0.26  | No filter | Yes |
| neg               | 78.9585  | Phosphoric acid                 | H3PO4                                       | [M-H2O-H] <sup>-</sup>   | 0.98 | -0.06 | 0.04  | No filter | No  |
| pos               | 123.091  | Dimethylaminopyridine           | C7H10N2                                     | [M+H] <sup>+</sup>       | 0.99 | -0.05 | 0.06  | No filter | No  |
| neg               | 96.969   | Phosphoric acid                 | H3PO4                                       | [M-H] <sup>-</sup>       | 0.99 | -0.07 | 0.05  | No filter | Yes |
| neg               | 96.9595  | Sulfuric acid                   | H3PO4                                       | [M-H] <sup>-</sup>       | 0.99 | -0.03 | 0.07  | No filter | No  |
| pos               | 100.075  | N-methyl 2-pyrrolidone          | C5H10NO                                     | [M+H] <sup>+</sup>       | 0.99 | -0.03 | 0.04  | No filter | No  |
| neg               | 94.9805  | Methanesulfuric acid            | CH3SO3H                                     | [M-H] <sup>-</sup>       | 0.99 | 0.02  | -0.03 | Filter    | Yes |
|                   |          |                                 |                                             |                          |      |       |       |           |     |
| Not found in data |          |                                 |                                             |                          |      |       |       |           |     |
| pos               | 59.0603  | Acetonitrile                    | CH3CN                                       | [M+NH4] <sup>+</sup>     |      |       |       |           |     |
| pos               | 74.0595  | Acetonitrile/Methanol           | (CH3CN) <sub>n</sub> (CH3OH) <sub>m</sub>   | [A1B1+H] <sup>+</sup>    |      |       |       |           |     |
| pos               | 83.0603  | Acetonitrile                    | CH3CN                                       | [M2+H] <sup>+</sup>      |      |       |       |           |     |
| pos               | 85.0588  | d6-Dimethylsulfoxide            | C2D6OS                                      | [M+H] <sup>+</sup>       |      |       |       |           |     |
| pos               | 101.0031 | Dimethylsulfoxide               | C2H6OS                                      | [M+Na] <sup>+</sup>      |      |       |       |           |     |
| pos               | 101.0808 | Methanol/Water                  | [MeOH] <sub>n</sub> [H2O] <sub>m</sub>      | [A2B2+H] <sup>+</sup>    |      |       |       |           |     |
| pos               | 115.0865 | Acetonitrile/Dimethyl formamide | (CH3CN) <sub>n</sub> (C3H7NO) <sub>m</sub>  | [A1B1+H] <sup>+</sup>    |      |       |       |           |     |
| pos               | 120.0477 | Dimethylsulfoxide               | C2H6OS                                      | [M+CH3CN+H] <sup>+</sup> |      |       |       |           |     |
| pos               | 130.159  | Diisopropylethylamine           | C8H19N                                      | [M+H] <sup>+</sup>       |      |       |       |           |     |
| pos               | 133.107  | Methanol/Water                  | [MeOH] <sub>n</sub> [H2O] <sub>m</sub>      | [A3B2+H] <sup>+</sup>    |      |       |       |           |     |

|     |          |                            |                                           |                |  |  |  |  |  |
|-----|----------|----------------------------|-------------------------------------------|----------------|--|--|--|--|--|
| pos | 137.0743 | Dimethylsulfoxide          | C2H6OS                                    | [M+CH3CN+NH4]+ |  |  |  |  |  |
| pos | 144.1746 | Tripropylamine             | C9H21N                                    | [M+H]+         |  |  |  |  |  |
| pos | 147.1128 | Acetonitrile/Methanol      | (CH3CN) <sub>n</sub> (CH3OH) <sub>m</sub> | [A2B2+H]+      |  |  |  |  |  |
| pos | 150.1277 | Phenyldiethylamine         | C10H15N                                   | [M+H]+         |  |  |  |  |  |
| pos | 157.0351 | Dimethylsulfoxide          | C2H6OS                                    | [M2+H]+        |  |  |  |  |  |
| pos | 163.0389 | Dimethyl phthalate         | C10H10O4                                  | [M-CH3OH+H]+   |  |  |  |  |  |
| pos | 169.1104 | d6-Dimethylsulfoxide       | C2D6OS                                    | [M2+H]+        |  |  |  |  |  |
| pos | 183.1438 | Methanol/Water             | [MeOH] <sub>n</sub> [H2O] <sub>m</sub>    | [A4B3+H]+      |  |  |  |  |  |
| pos | 186.2216 | Tributylamine              | C12H27N                                   | [M+H]+         |  |  |  |  |  |
| pos | 214.0896 | n-butyl benzenesulfonamide | C10H15NO2S                                | [M+H]+         |  |  |  |  |  |
| pos | 231.1161 | n-butyl benzenesulfonamide | C10H15NO2S                                | [M+NH4]+       |  |  |  |  |  |
| pos | 315.2529 | Dibutyl sebacate           | C18H34O4                                  | [M+H]+         |  |  |  |  |  |
| pos | 371.3155 | Bis(2-ethylhexyl) adipate  | C22H42O4                                  | [M+H]+         |  |  |  |  |  |
| pos | 371.3155 | Diisooctyl phthalate       | C22H42O4                                  | [M+H]+         |  |  |  |  |  |
| pos | 391.2842 | Diisooctyl phthalate       | C24H38O4                                  | [M+H]+         |  |  |  |  |  |
| neg | 59.0138  | Acetic acid                | CH3COOH                                   | [M-H]-         |  |  |  |  |  |
| neg | 79.9573  | Sulfuric acid              | H2SO4                                     | [M-H2O]-       |  |  |  |  |  |
| neg | 112.9855 | Trifluoroacetic acid       | CF3COOH                                   | [M-H]-         |  |  |  |  |  |
| neg | 162.9824 | Pentafluoropropionic acid  | CF3CF2COOH                                | [M-H]-         |  |  |  |  |  |
| neg | 226.9784 | Trifluoroacetic acid       | CF3COOH                                   | [M2-H]-        |  |  |  |  |  |
| neg | 281.2486 | Oleic acid                 | C18H34O2                                  | [M-H]-         |  |  |  |  |  |

All contaminants except for acetamide (ID5, contaminant of our lab) were extracted from the list of Keller et al. [16].

Abbreviations: Mod. = Ionization mode, Ion. = Ionization, CCC = Concordance correlation coefficient, LS = Location shift, BA = Bland-Altman, Elev. in = Elevated in, Amb. air = Ambient air, Ref = Reference

## 3. Supplementary figures

### 3.1 Figure S1

Bland-Altman plots and CCC plots of all detected metabolites in exhaled breath samples. Plots on the left represent Bland-Altman plots with bias (mean of with filter - without filter differences) as dashed line enclosed in either pink or blue colored ribbon representing. Pink colour indicates a negative bias, i.e. signal intensity reduction with filter usage and blue colour indicates a positive bias, i.e. signal intensity increase with filter usage. The ribbon itself is equal to the 95% confidence interval of the bias. The top and the bottom lines represent the

agreement limits, i.e.  $\pm 1.96s$ , where  $s$  is the standard deviation of differences. The horizontal black line represents the 0 difference. Plots on the right capture signal intensities without filter usage (x-axis) and with filter usage (y-axis). The diagonal black line represents the line of perfect agreement. The dashed line represents the simple linear regression for signal intensities with filter usage as a function of intensities without filter usage. Included in the bottom right corner are concordance correlation coefficient (CCC), the location shift and the scale shift. The plots are ordered by CCC (from lower to higher).

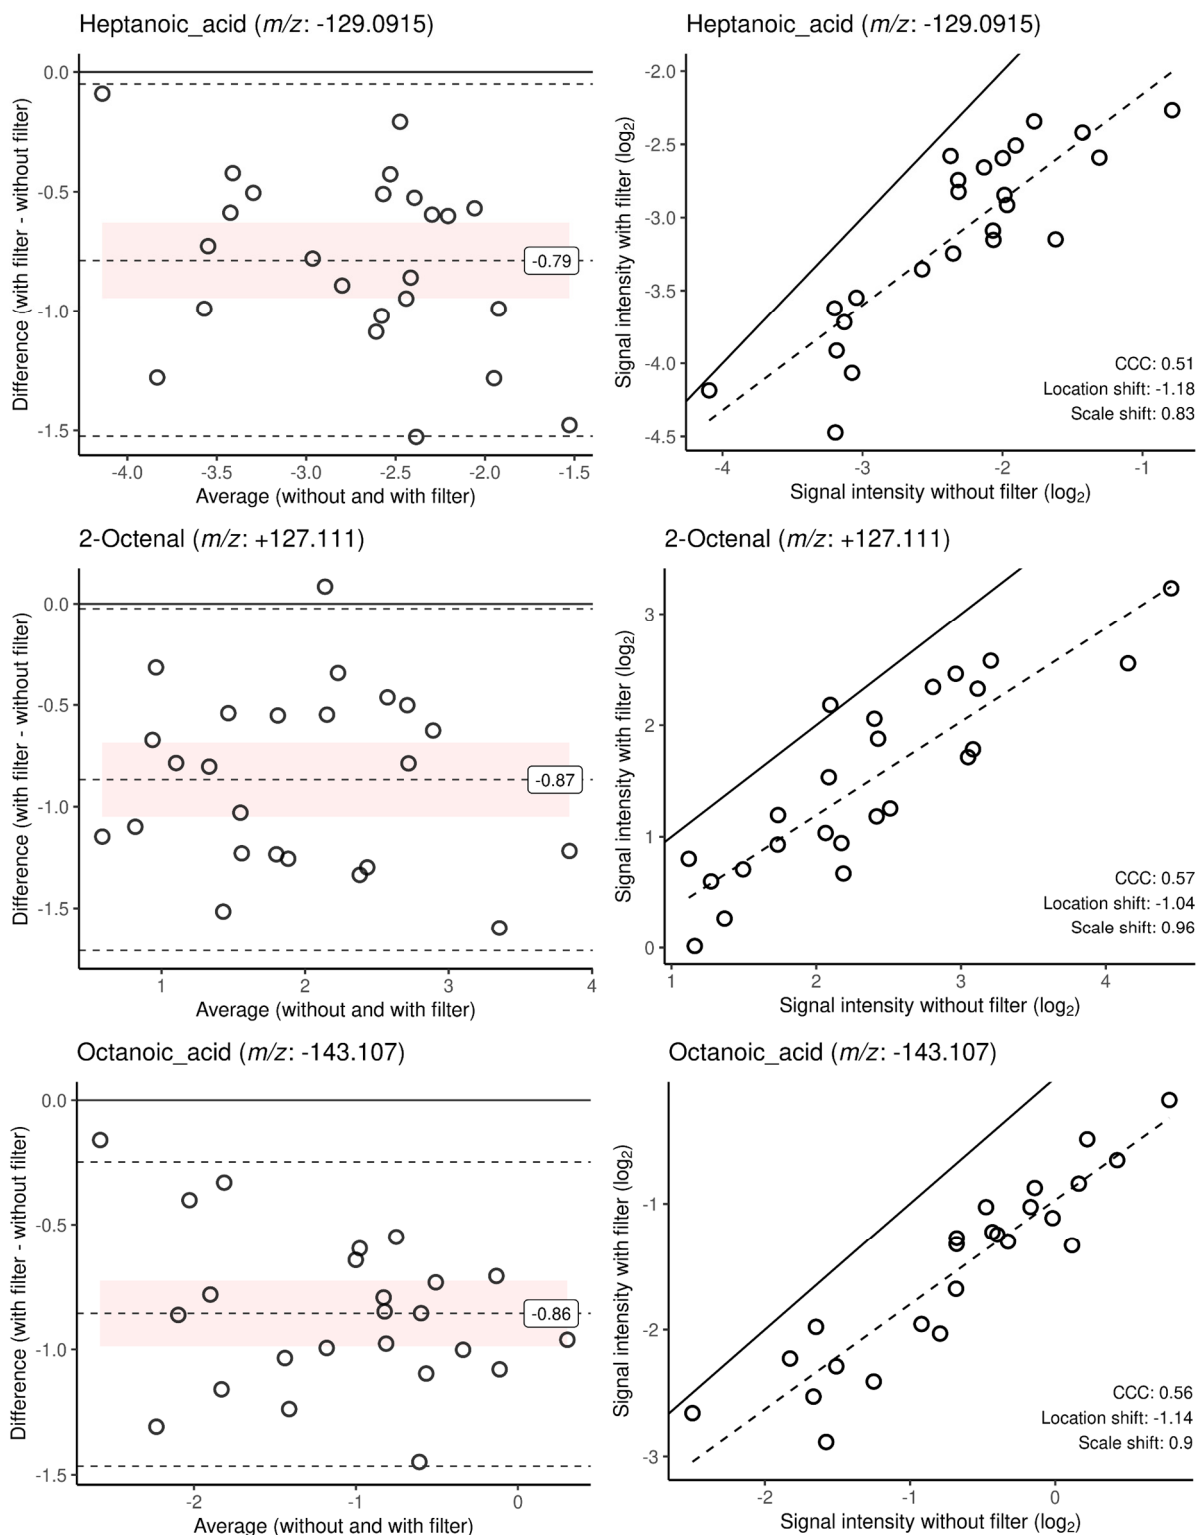

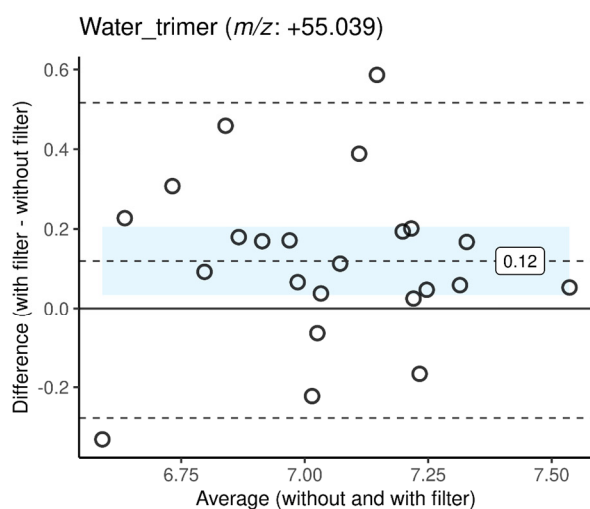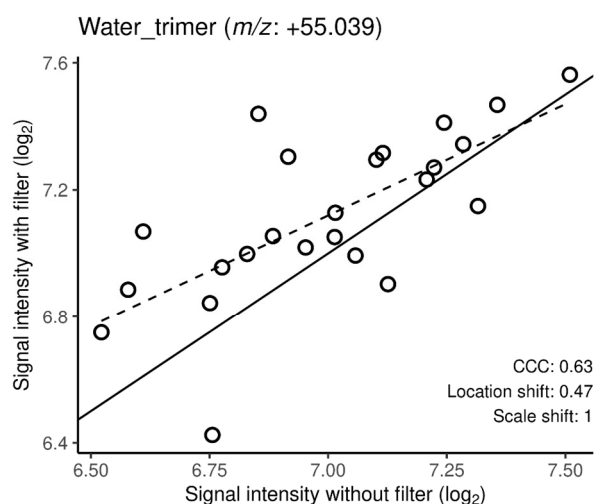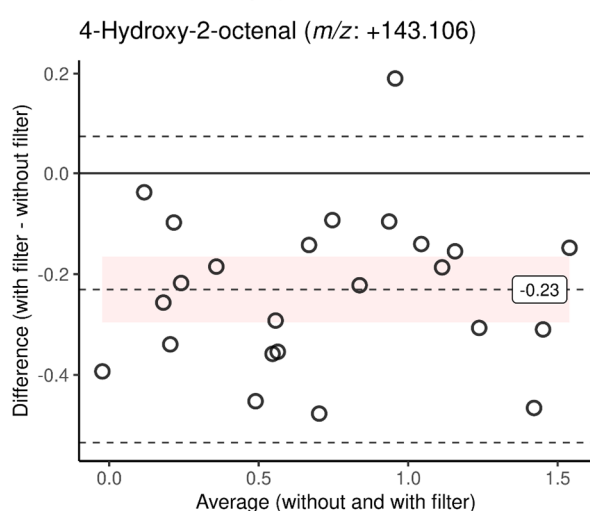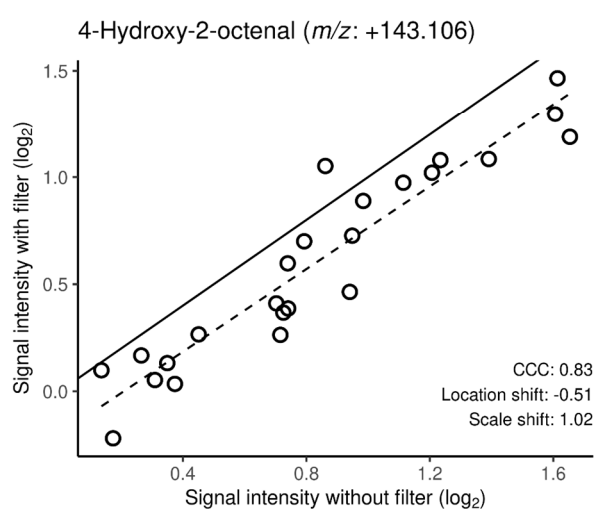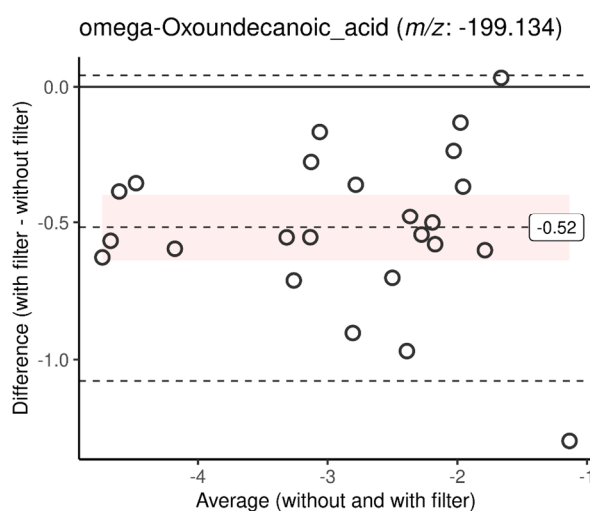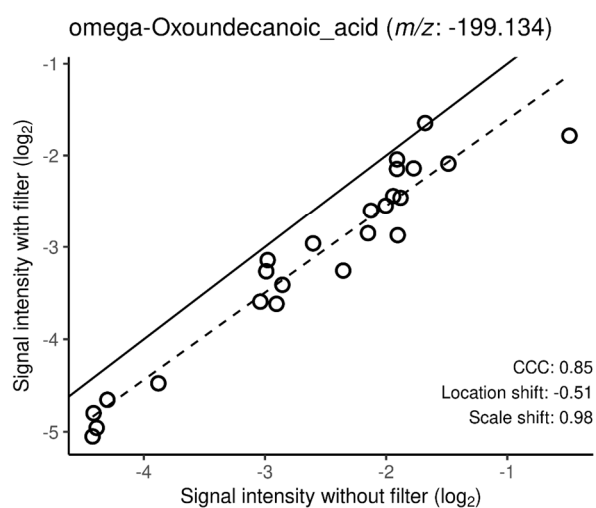

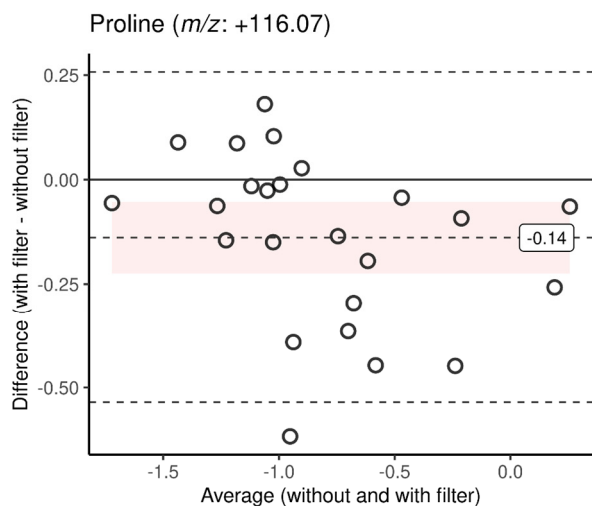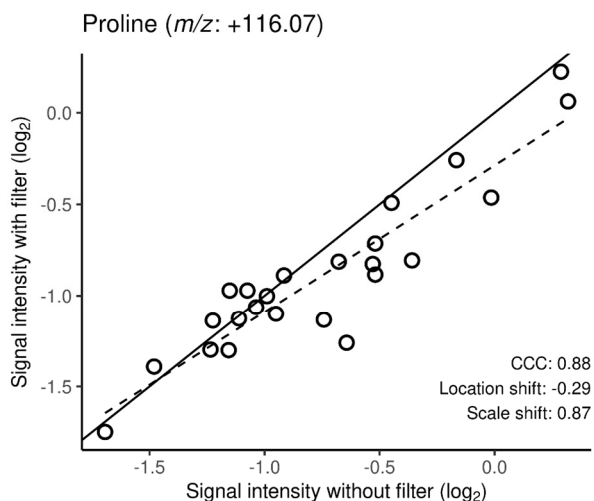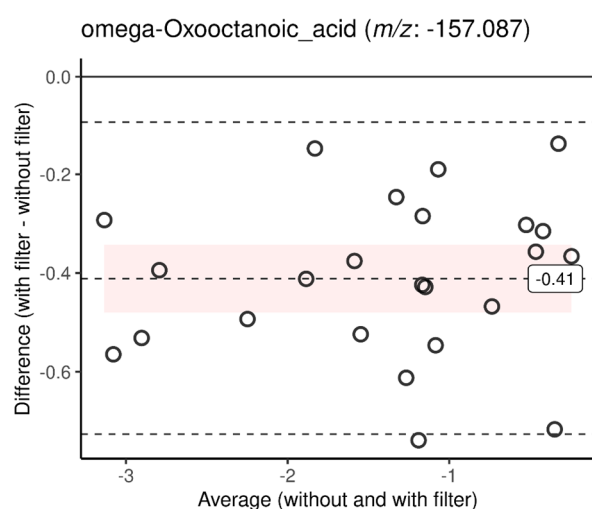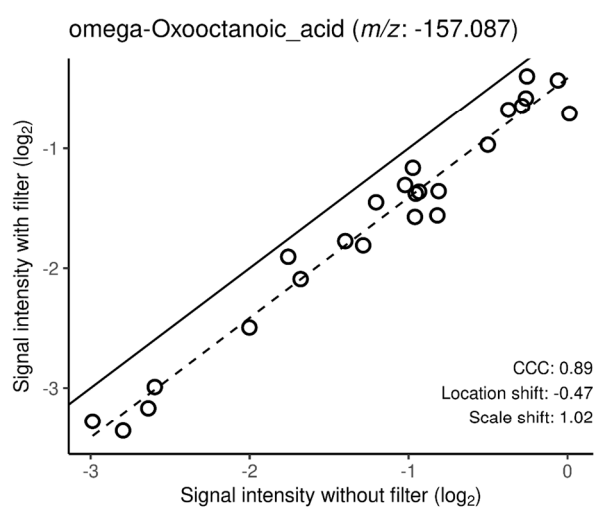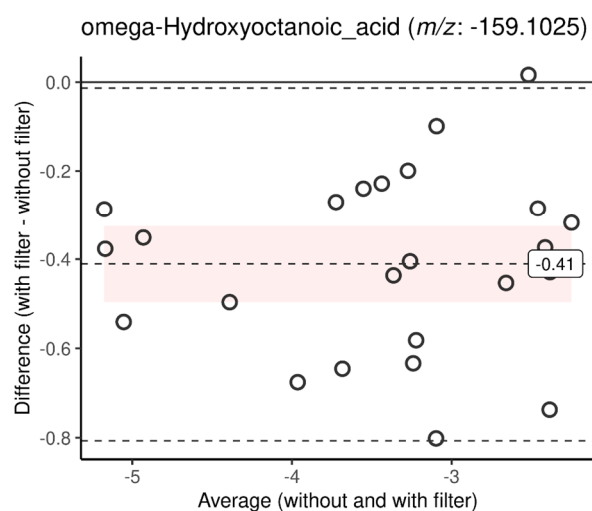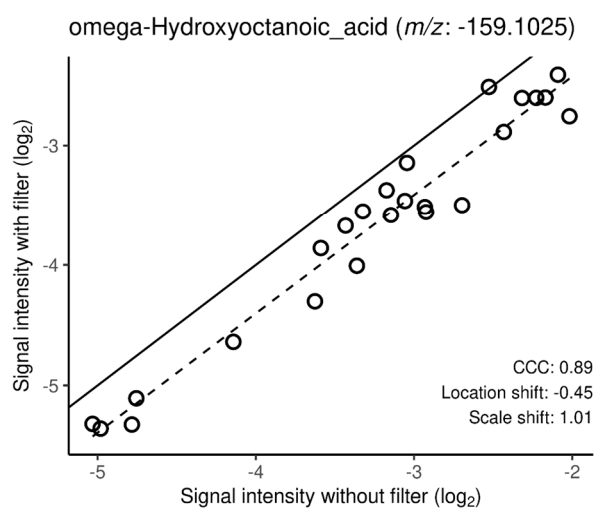

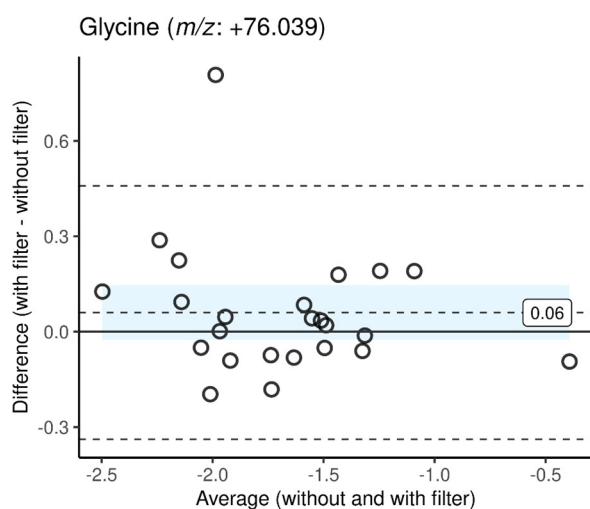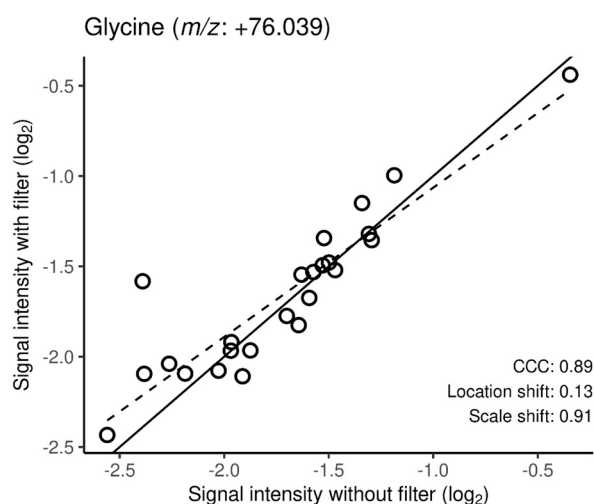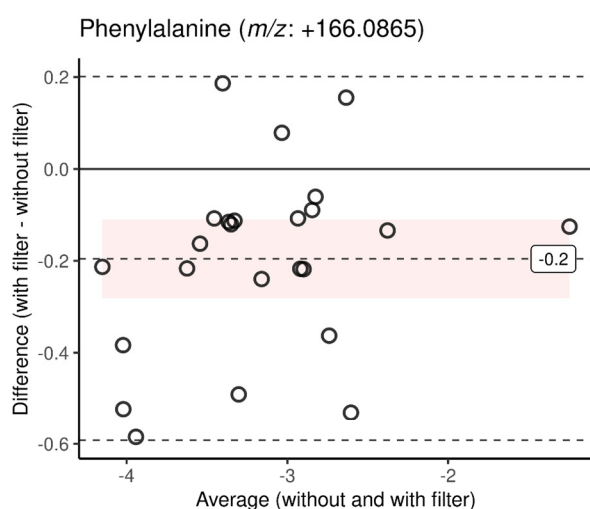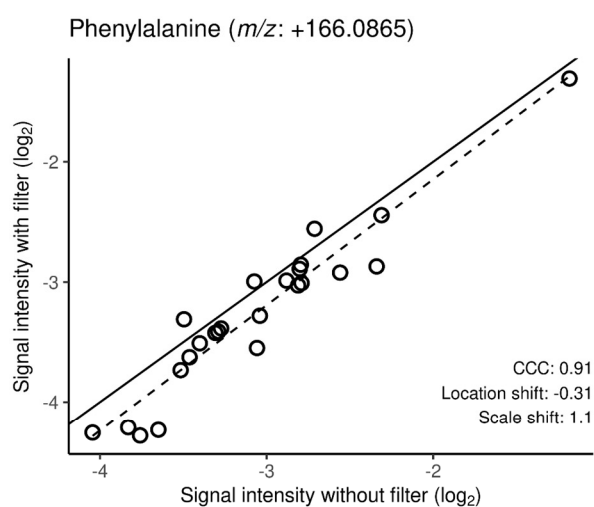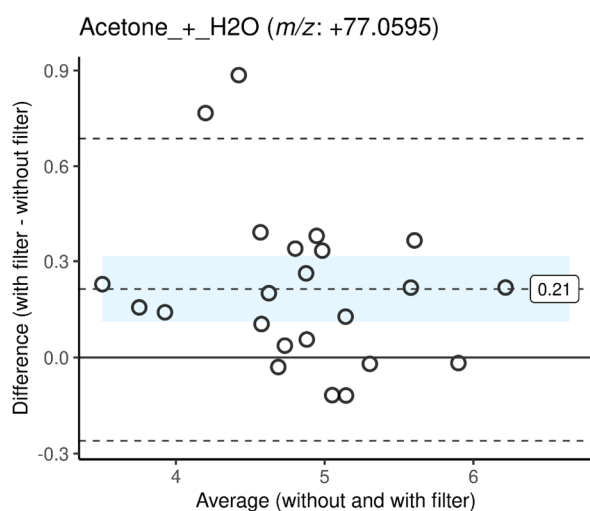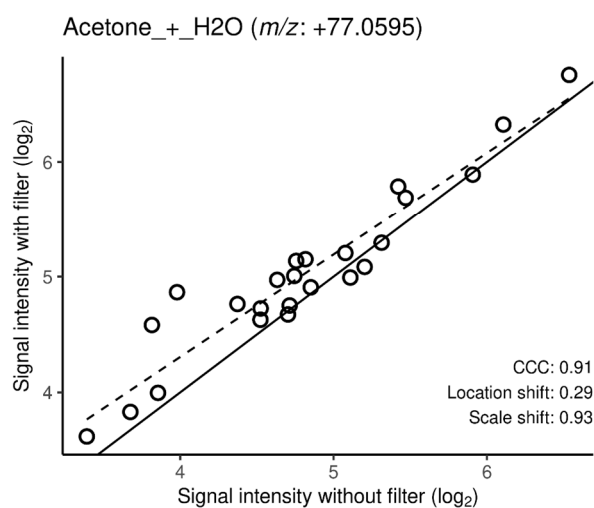

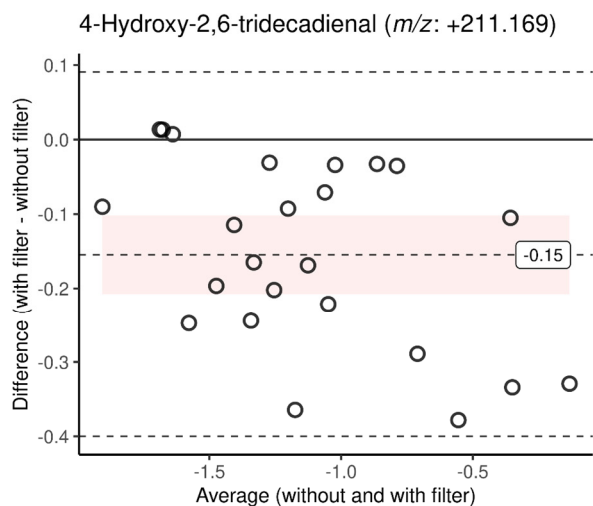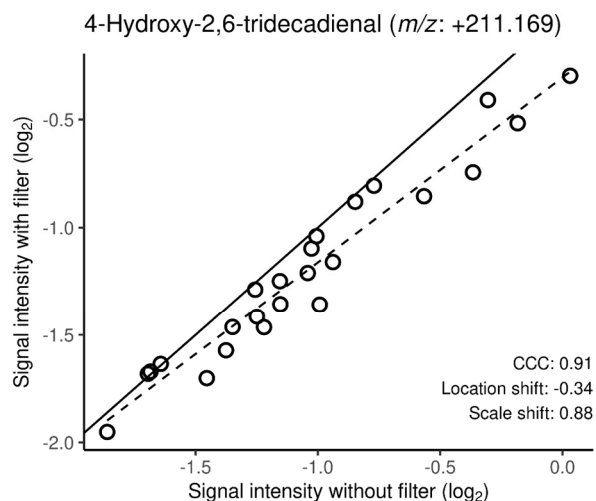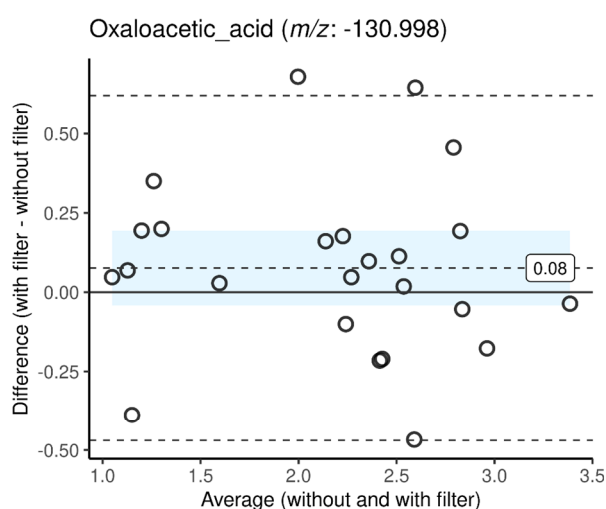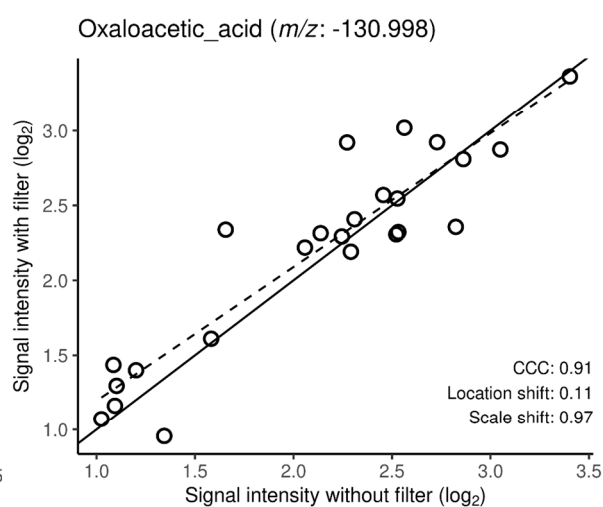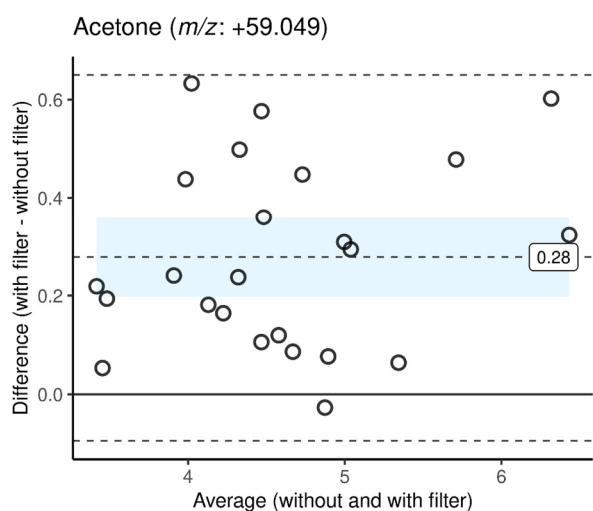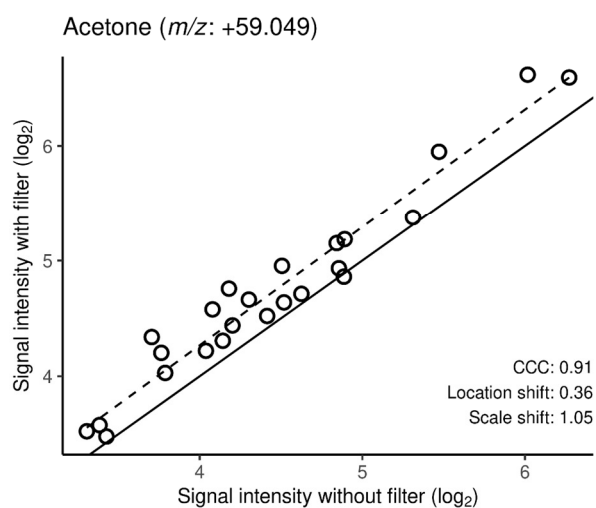



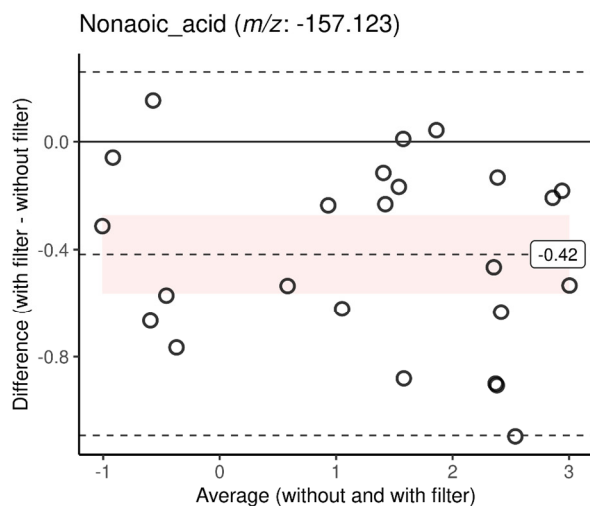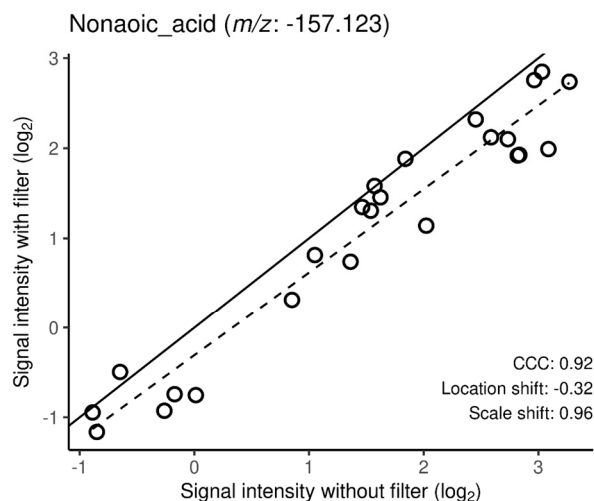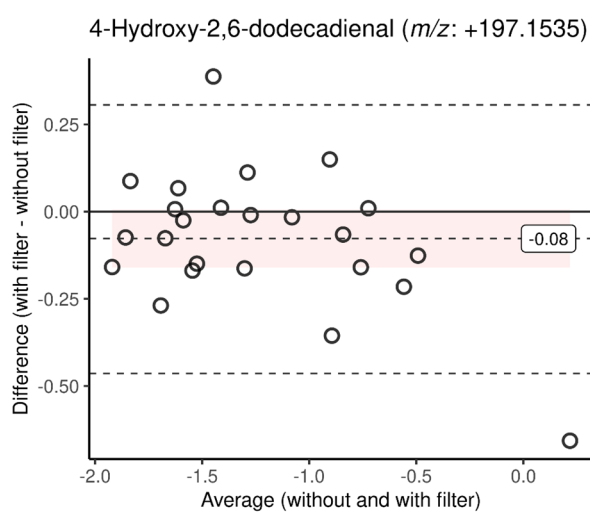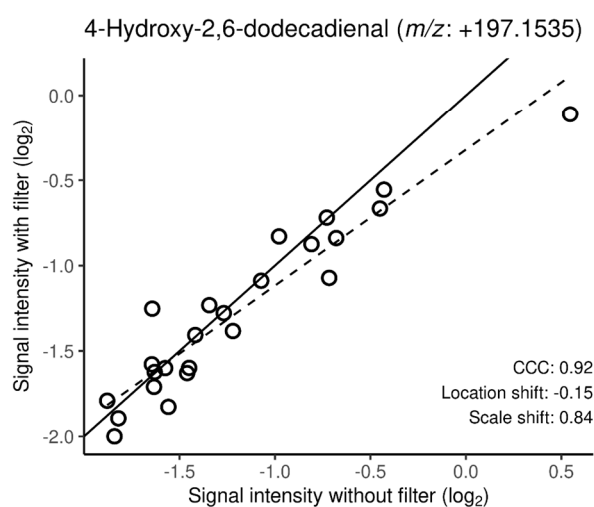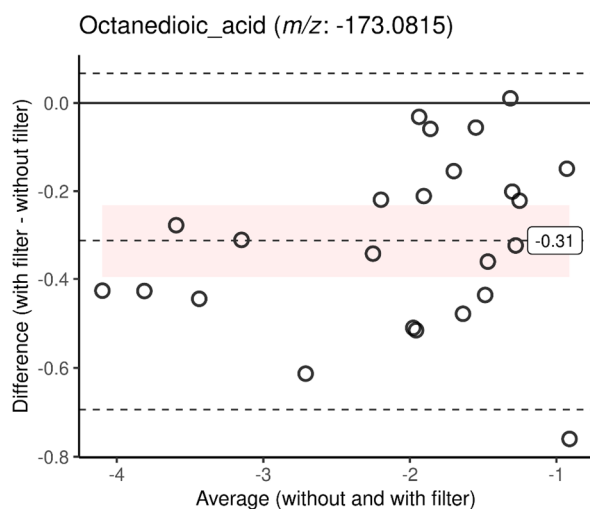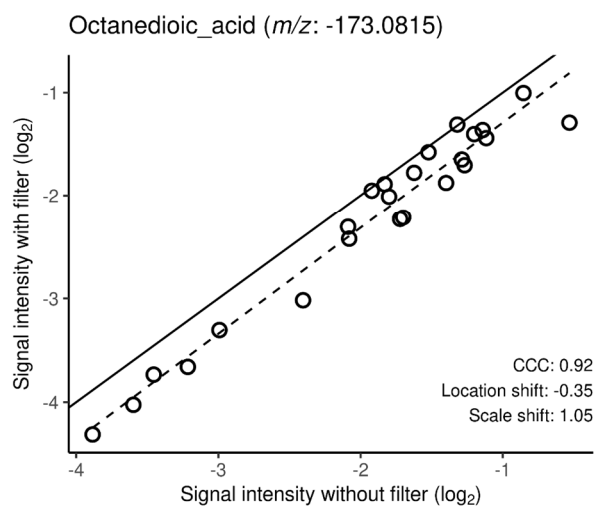

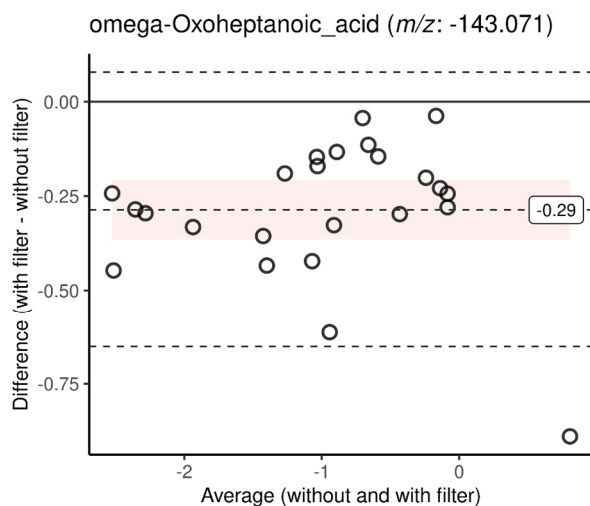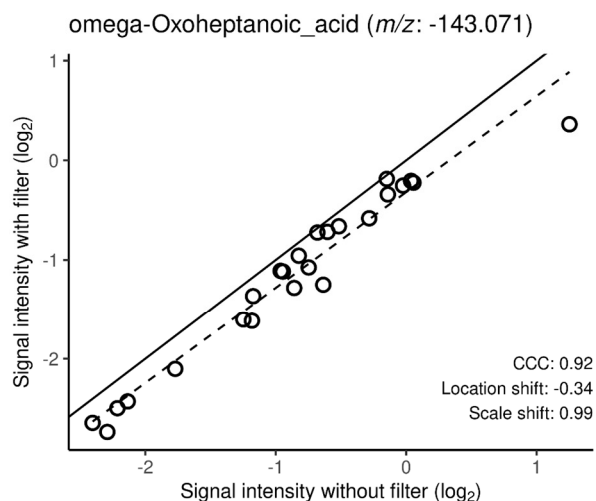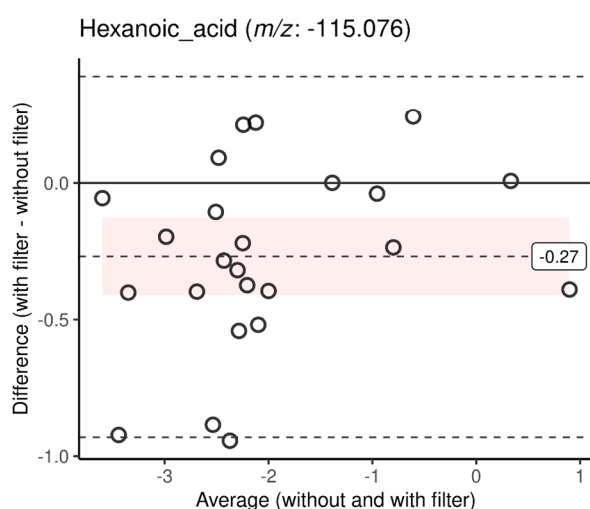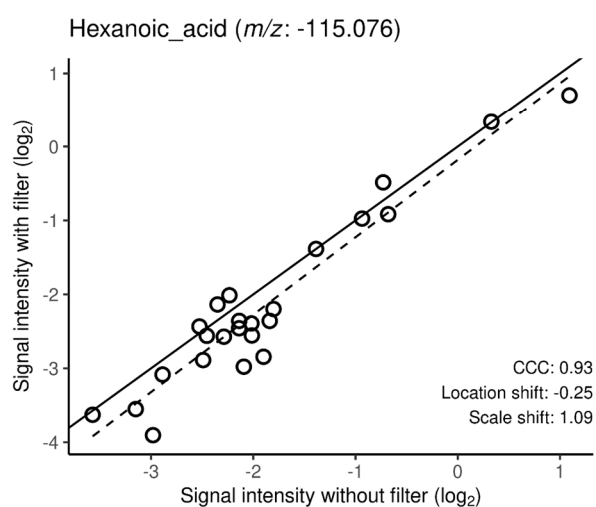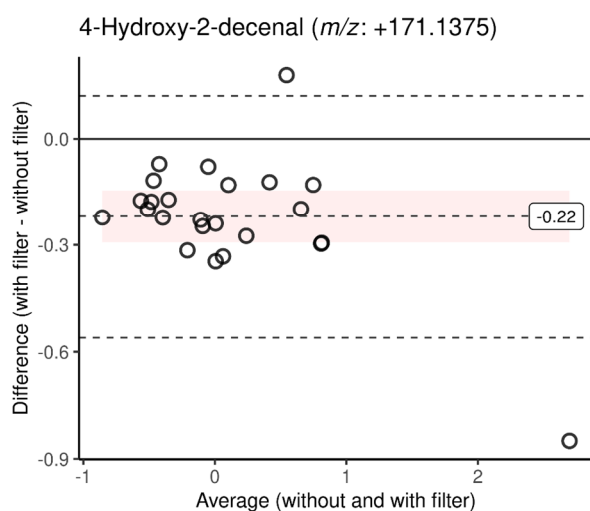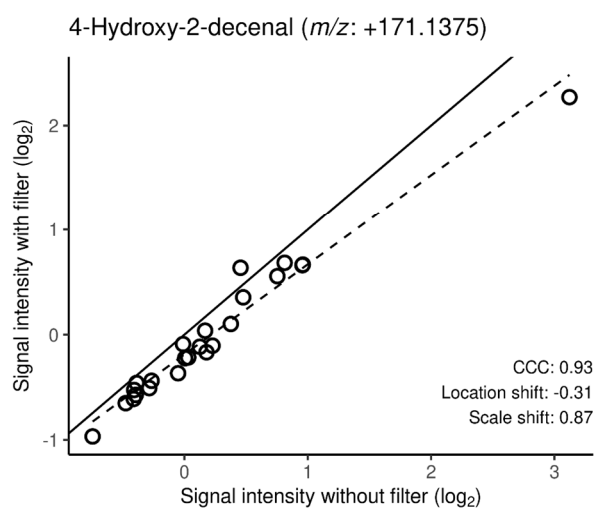

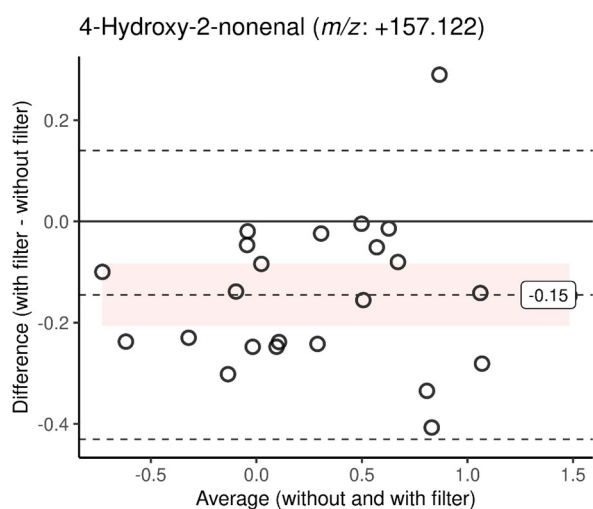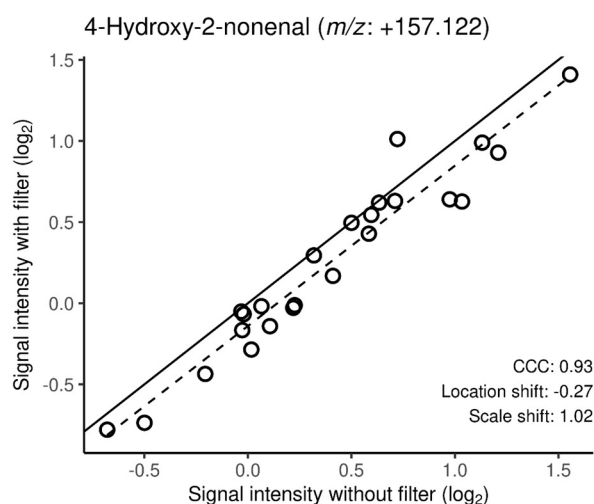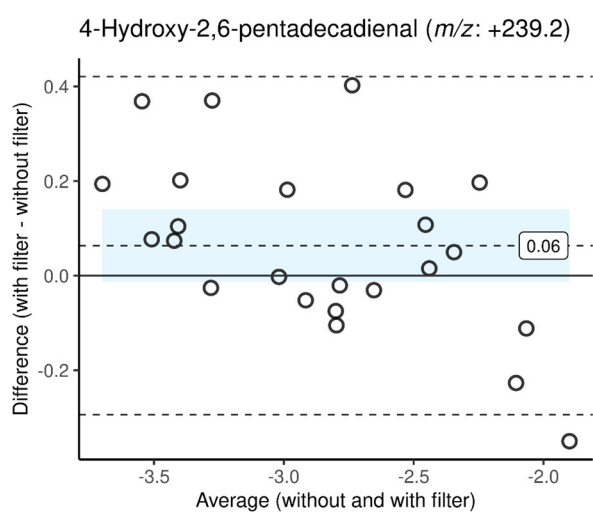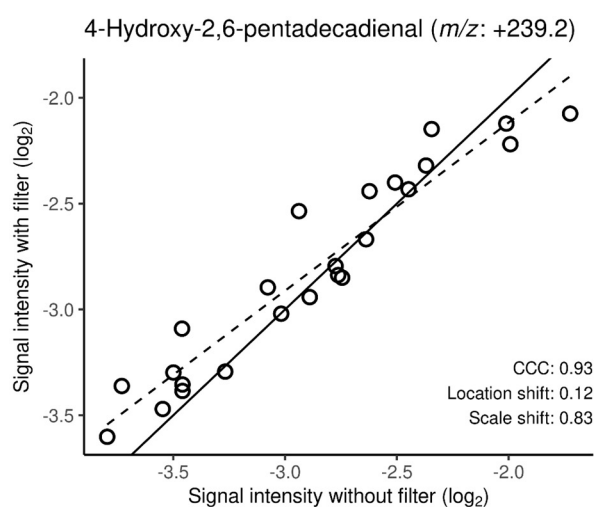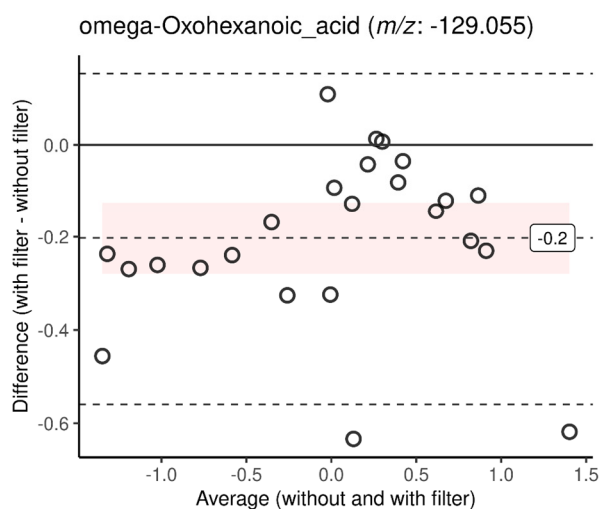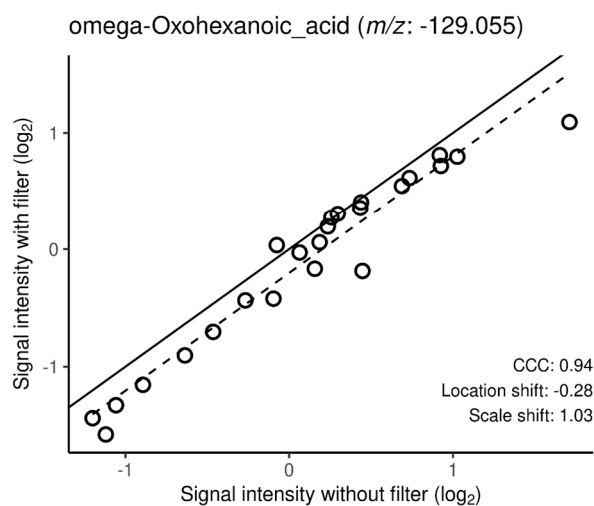

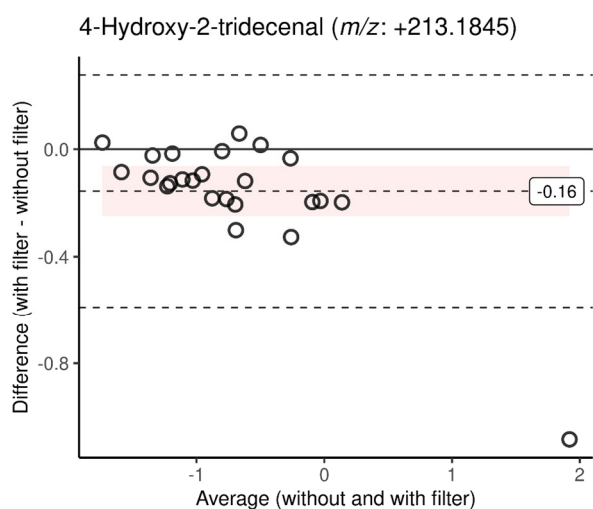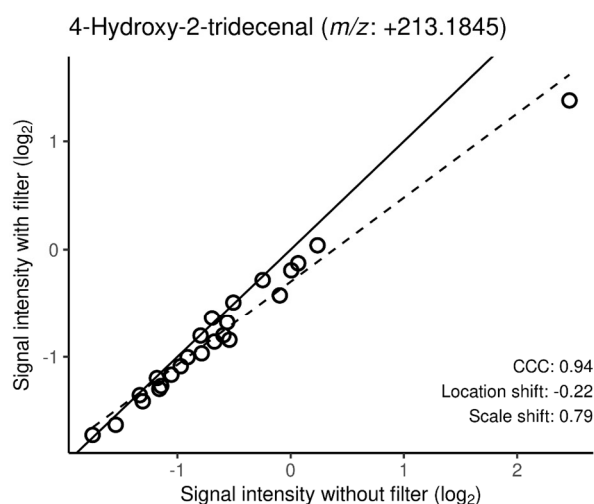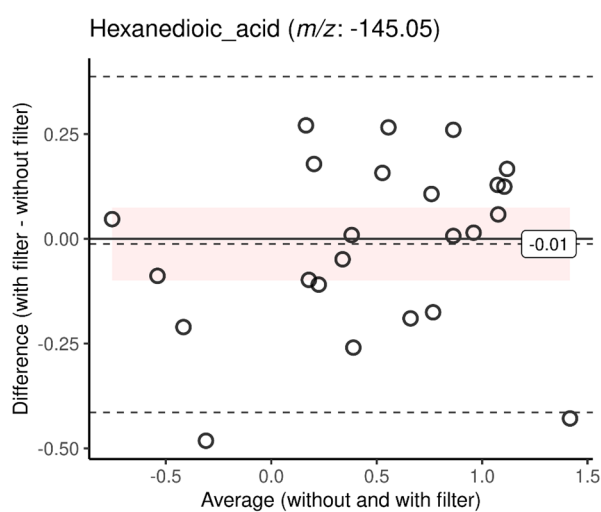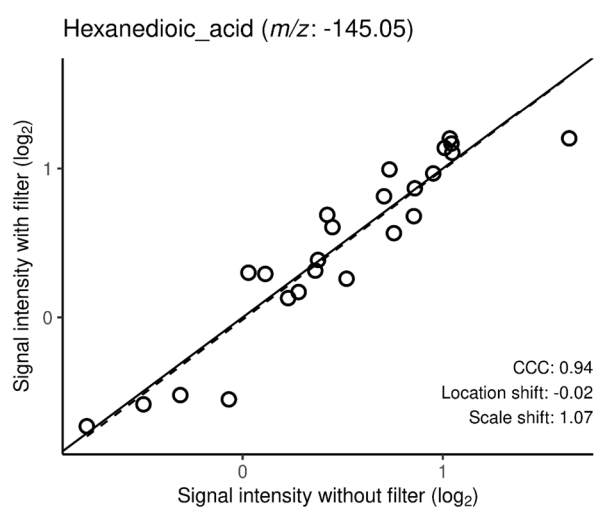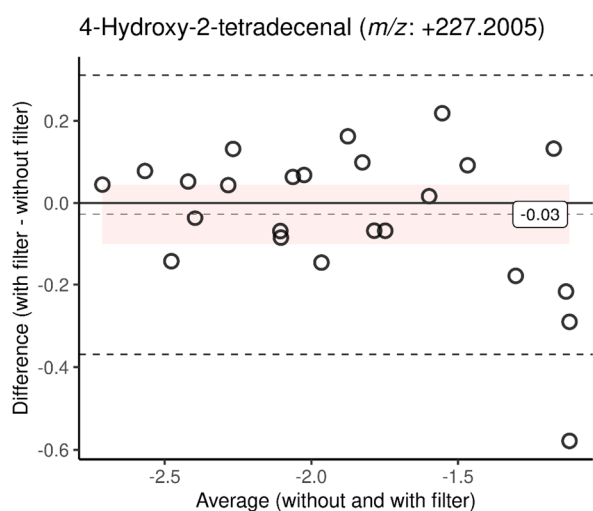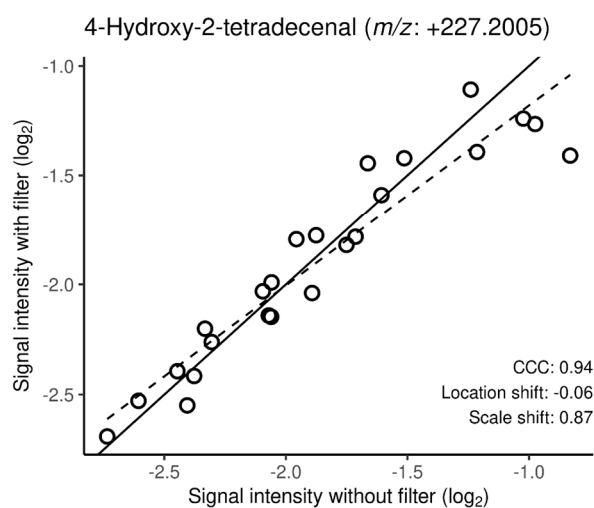

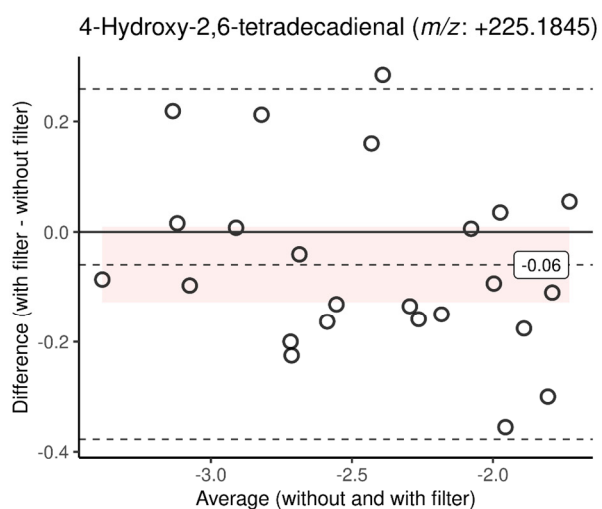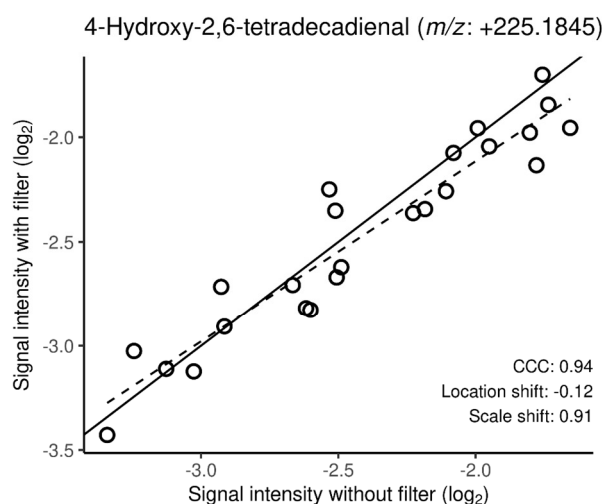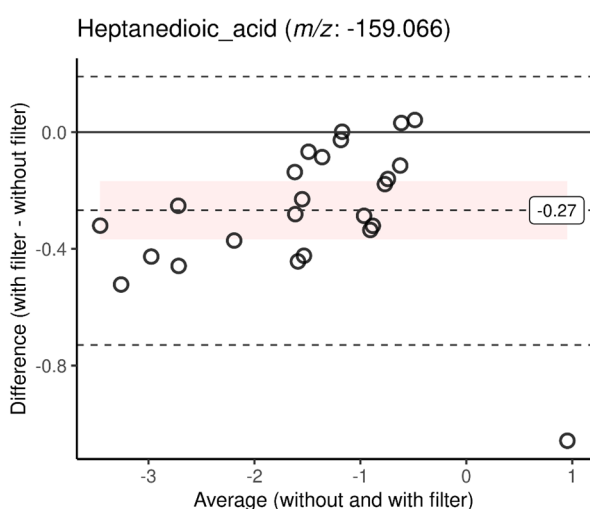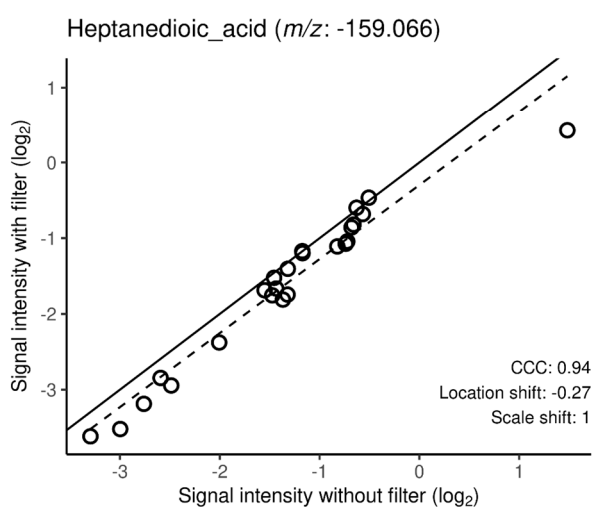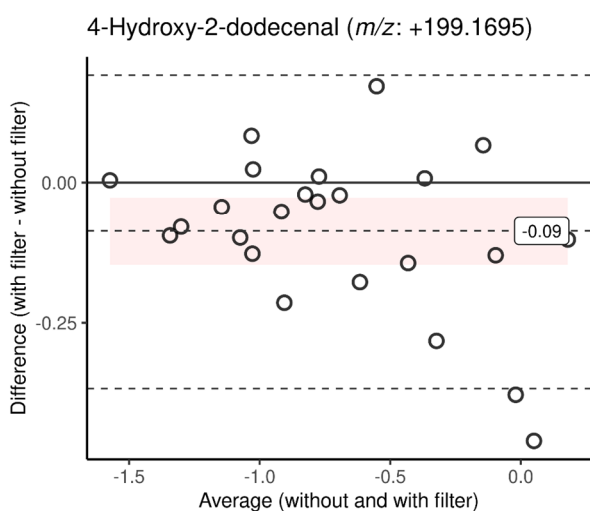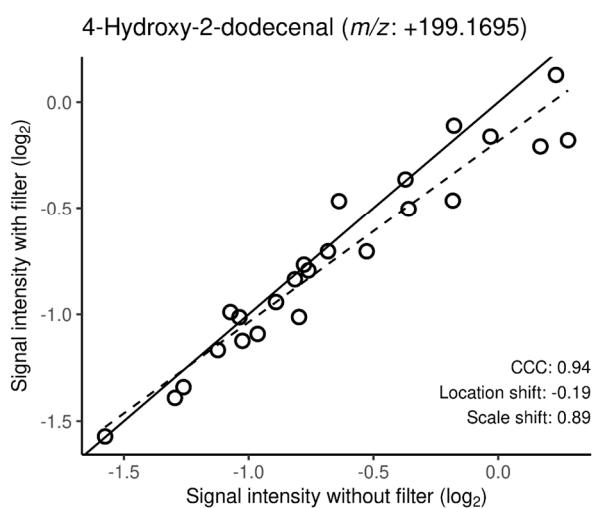

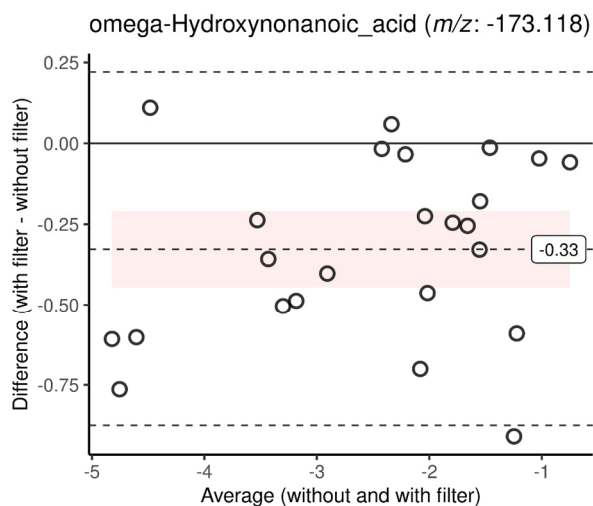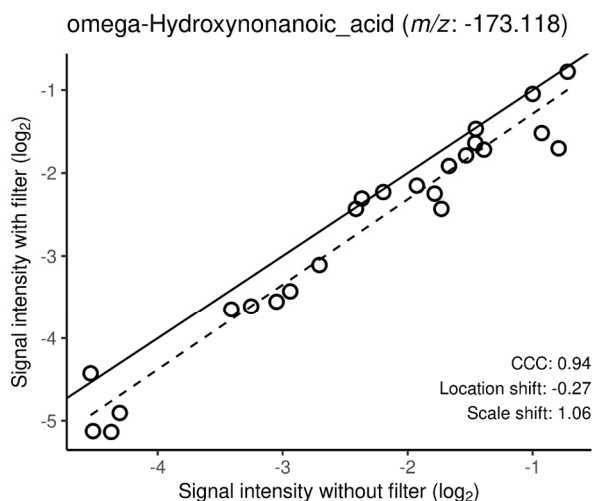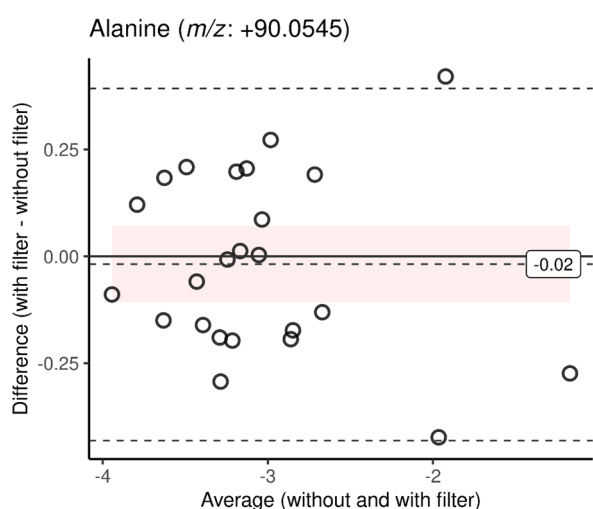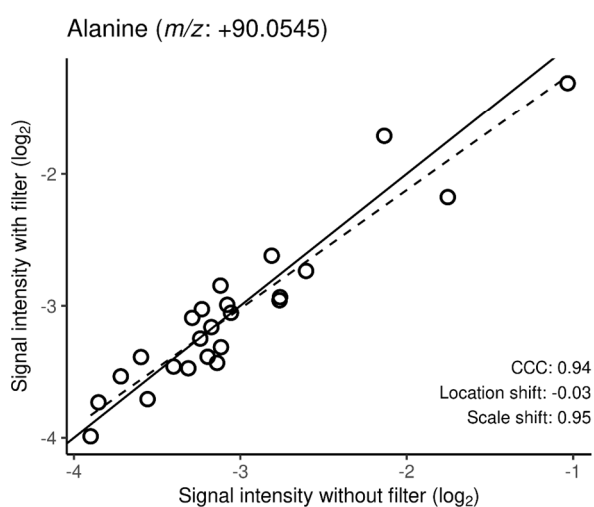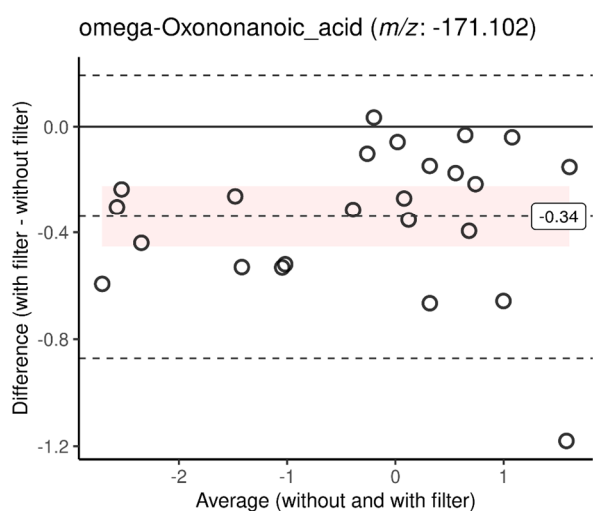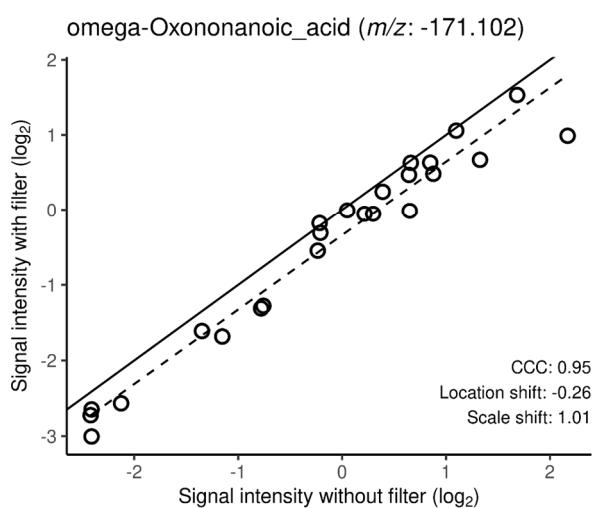

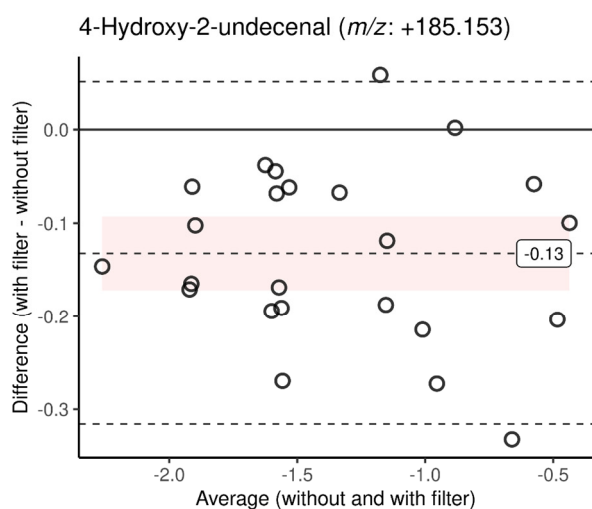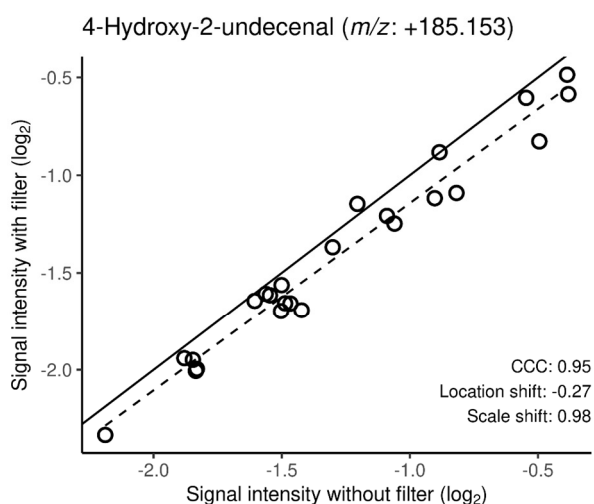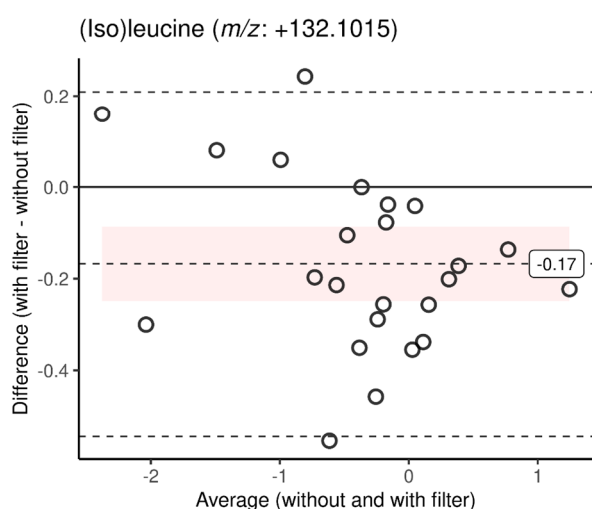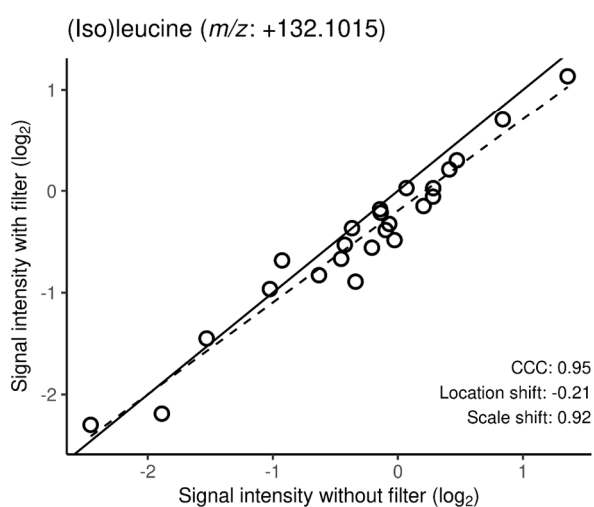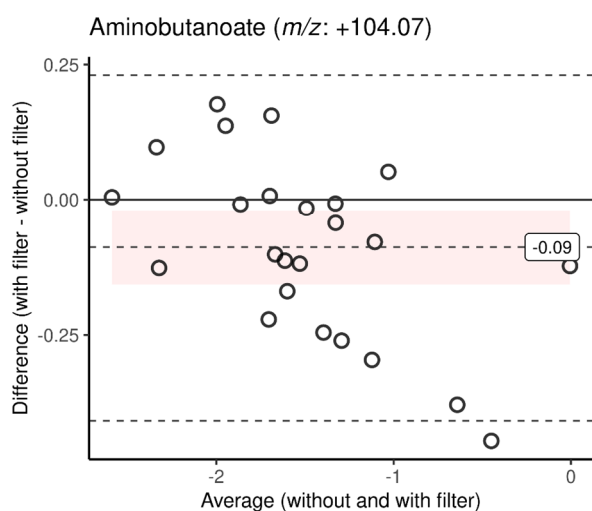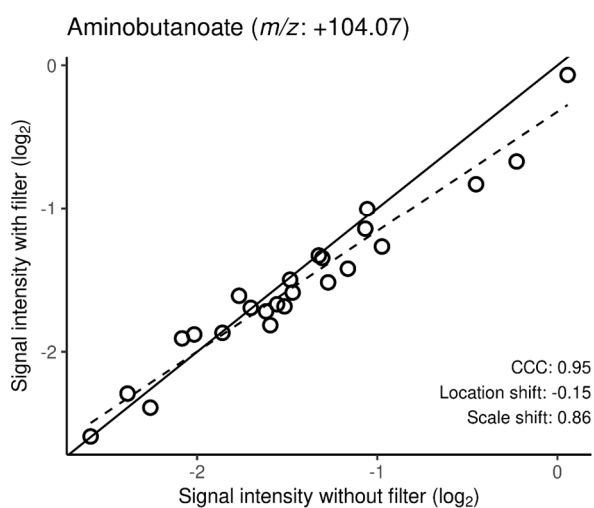

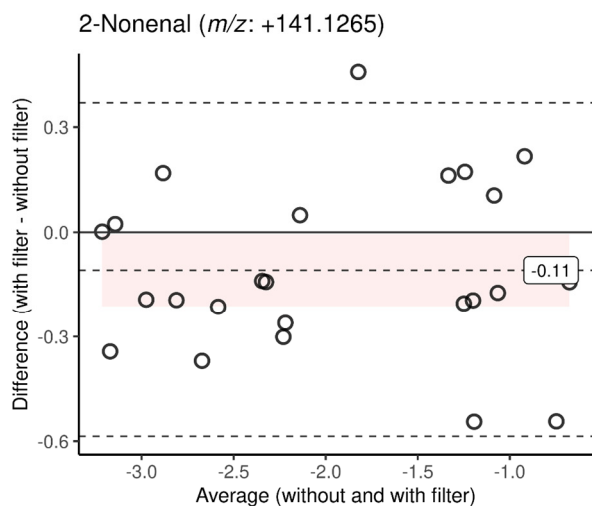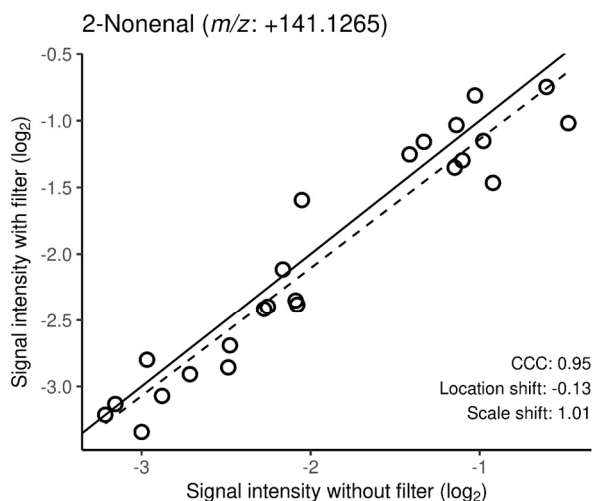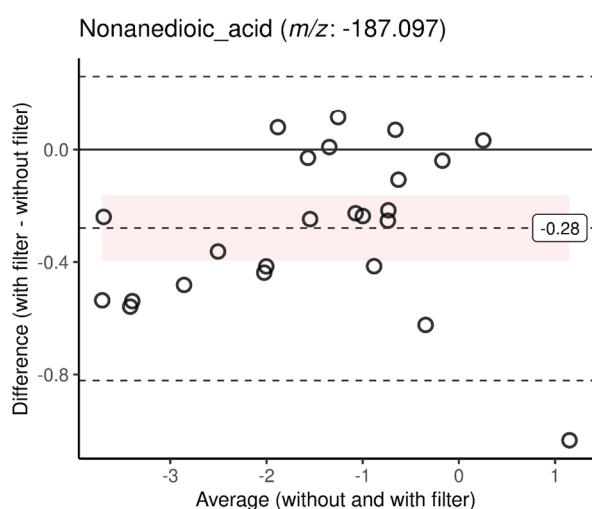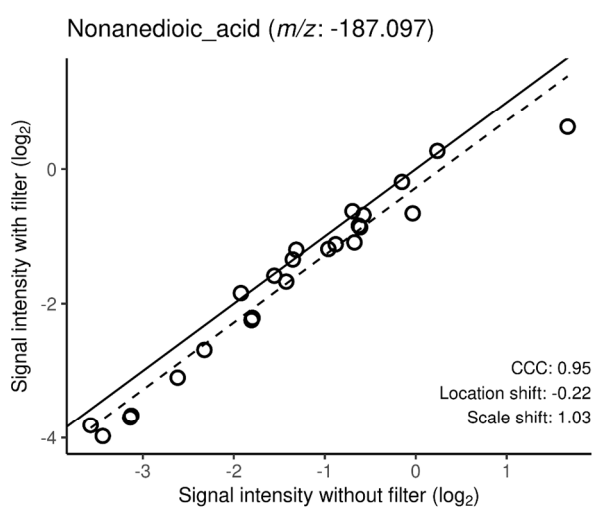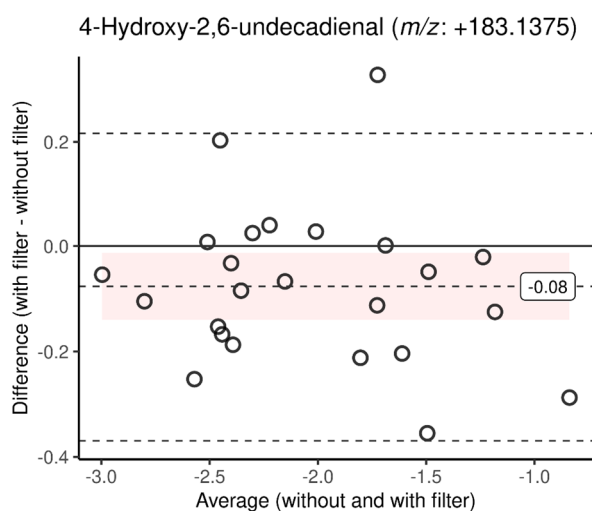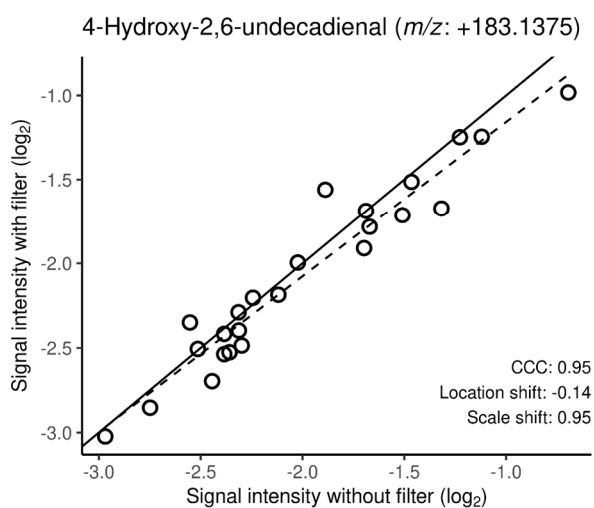



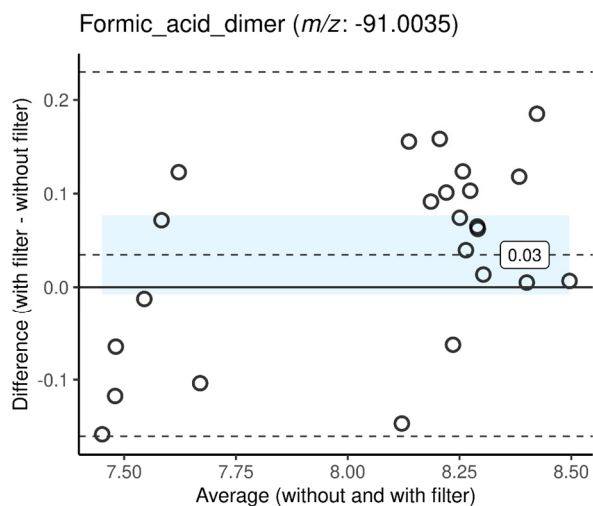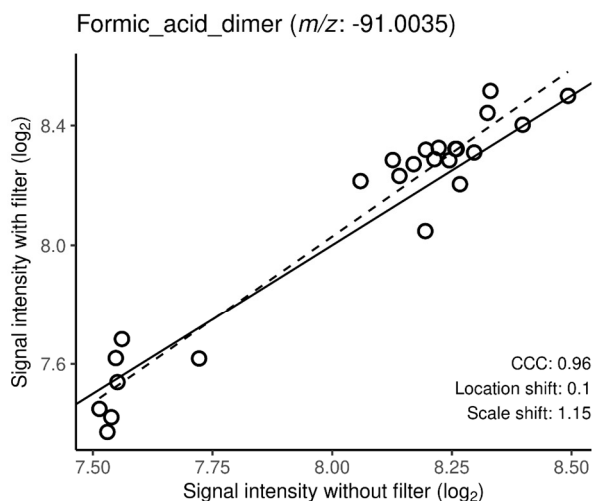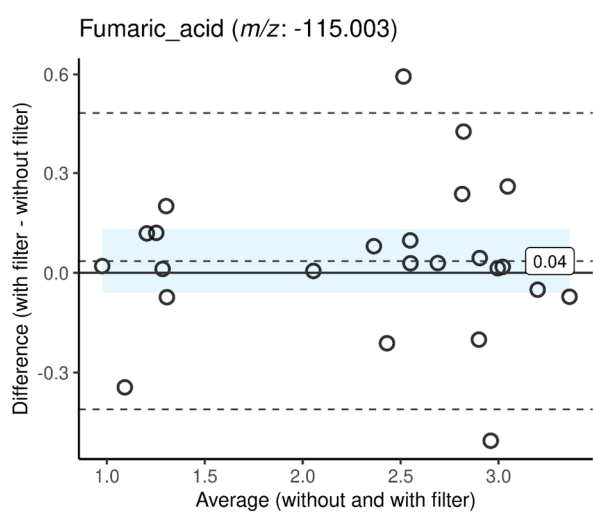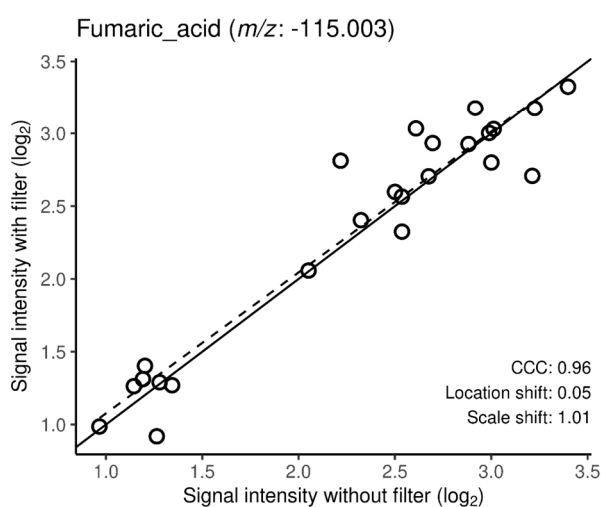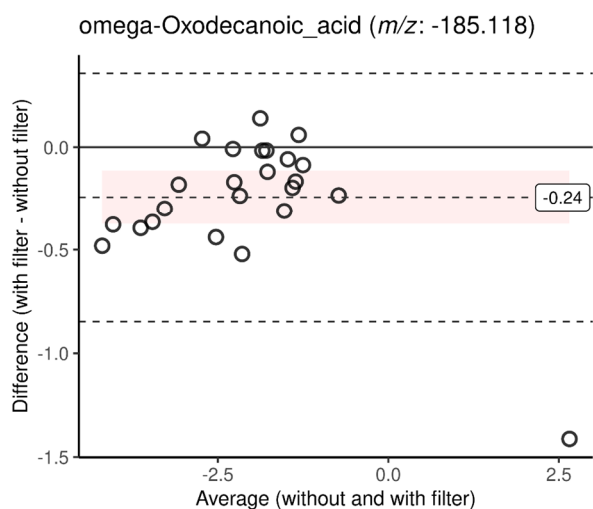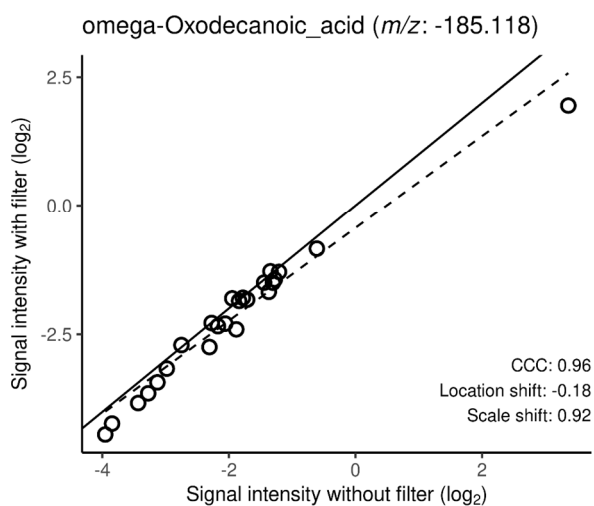

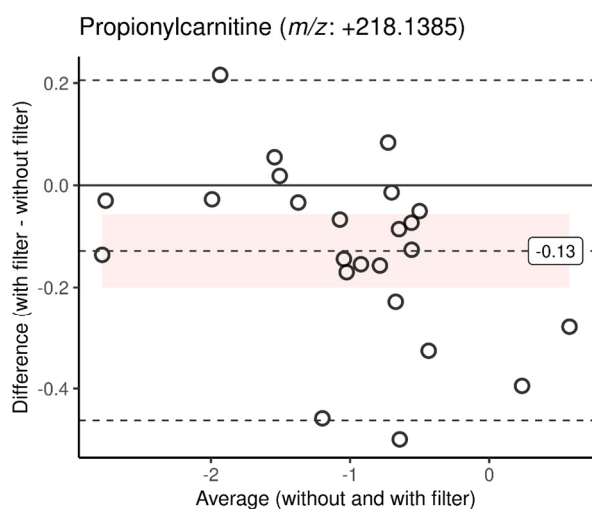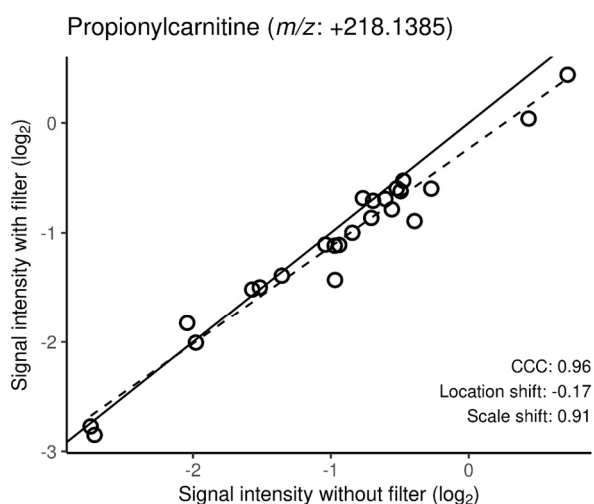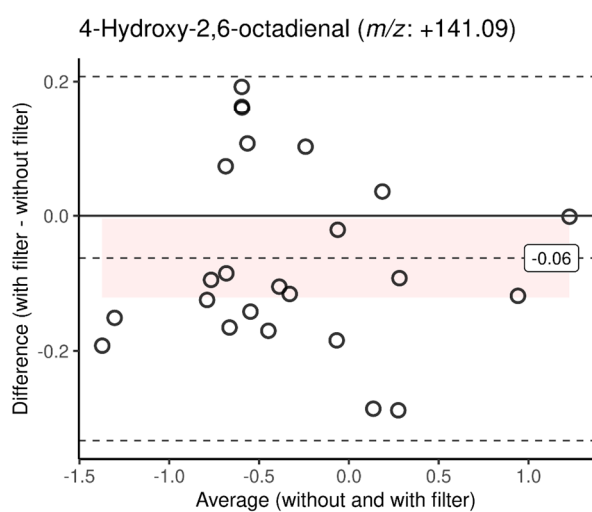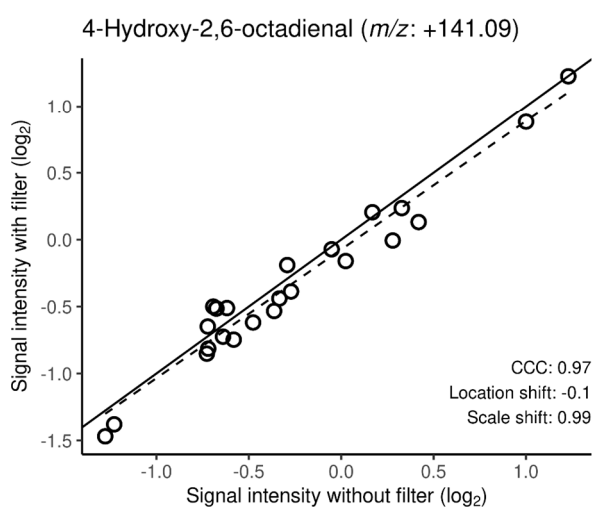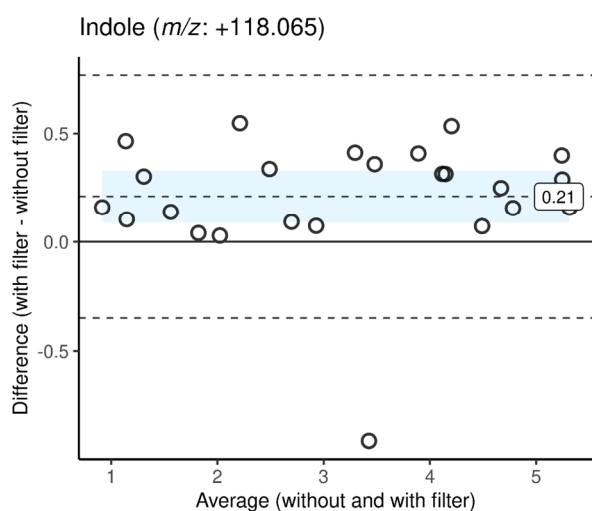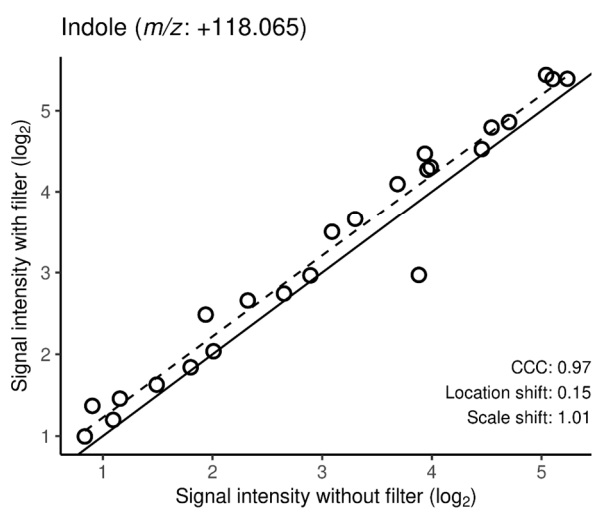

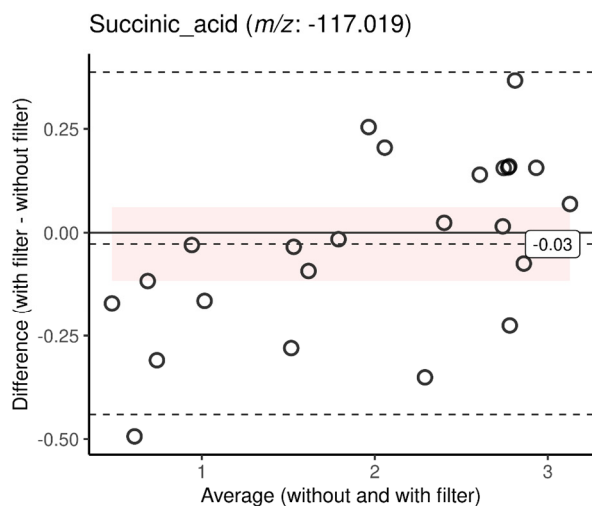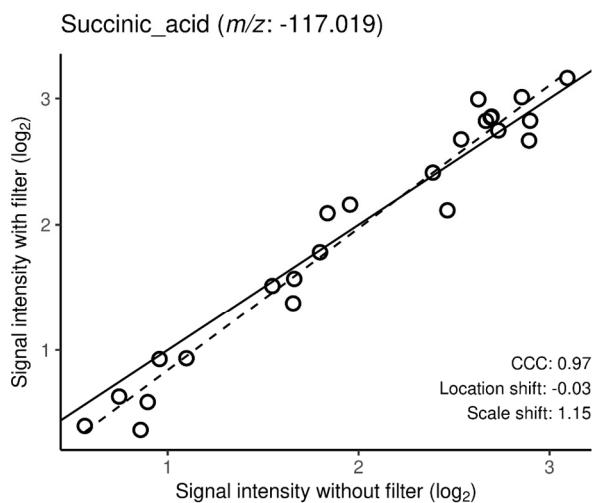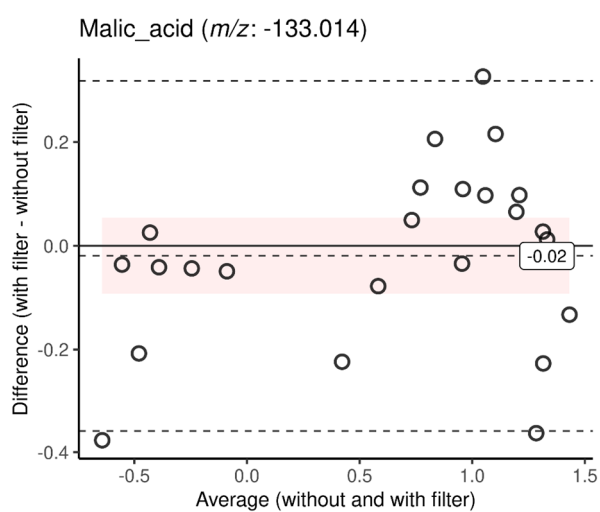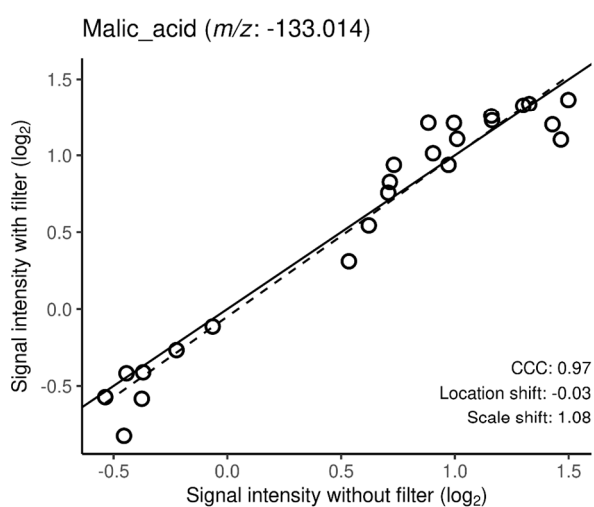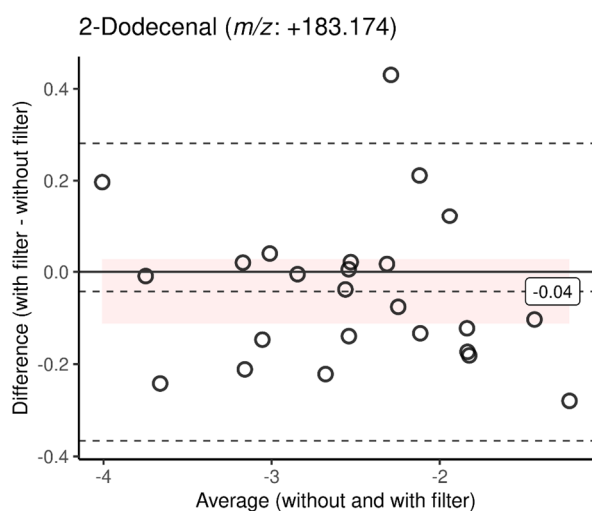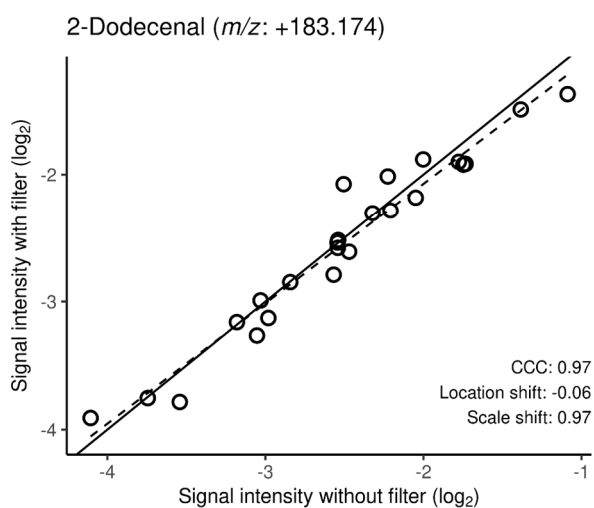

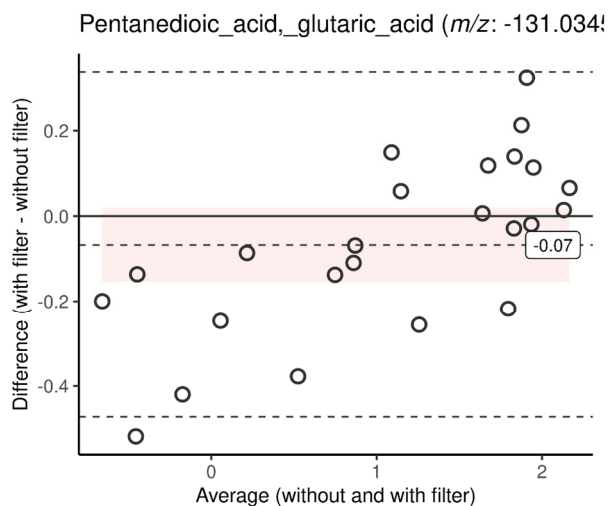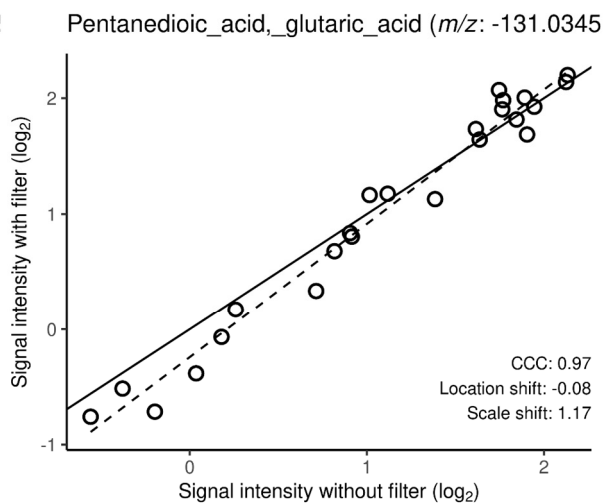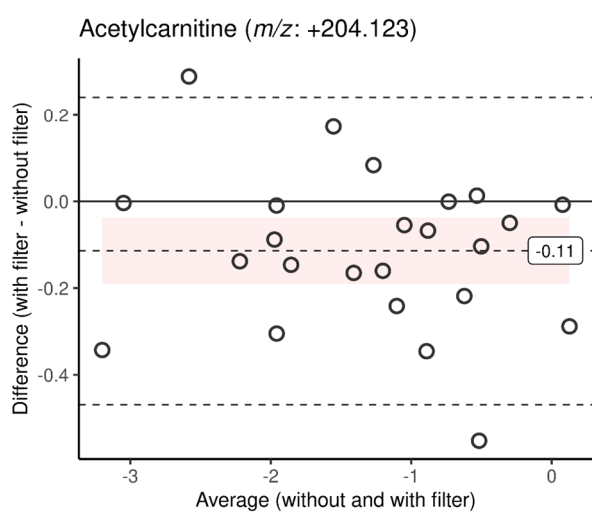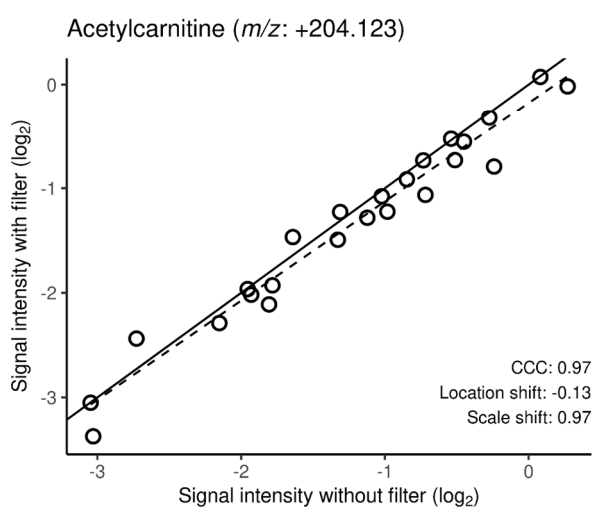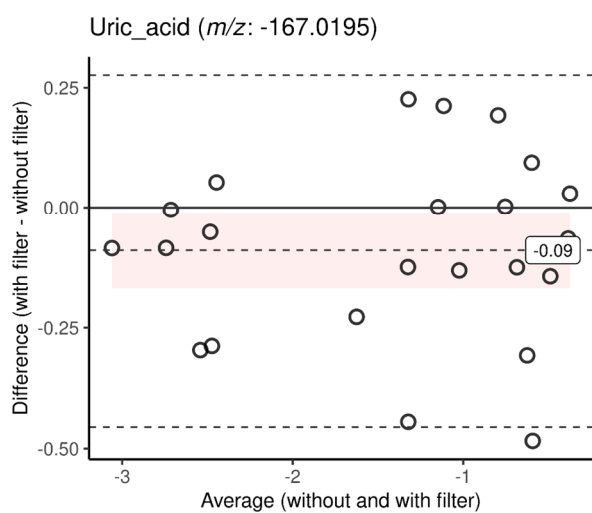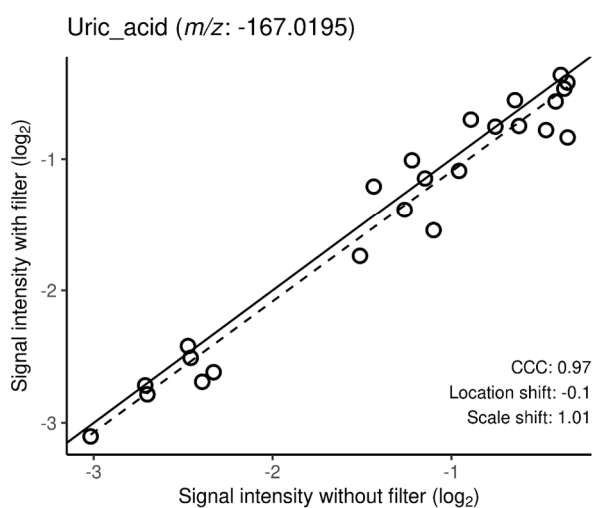

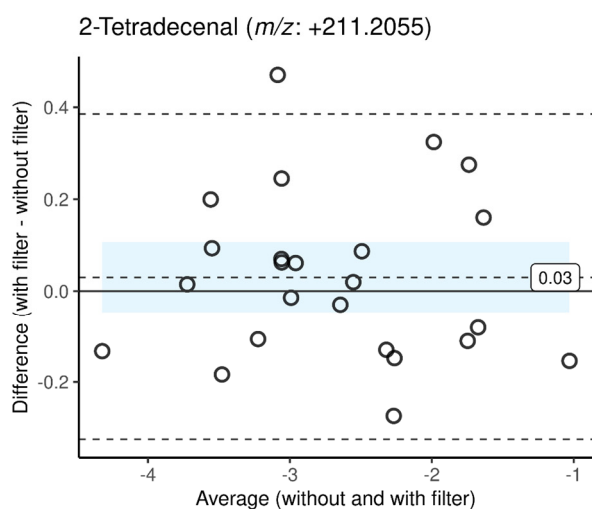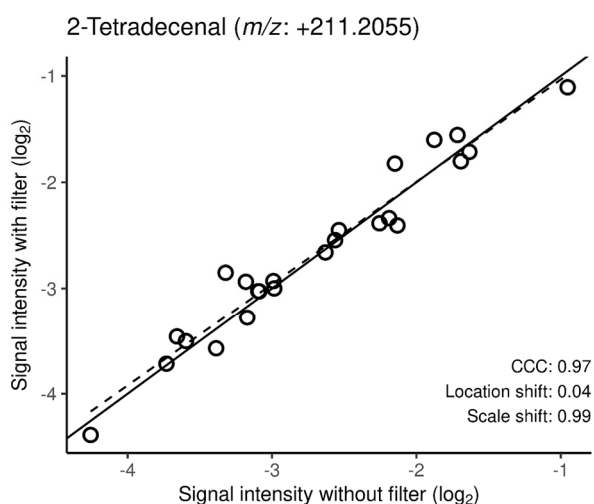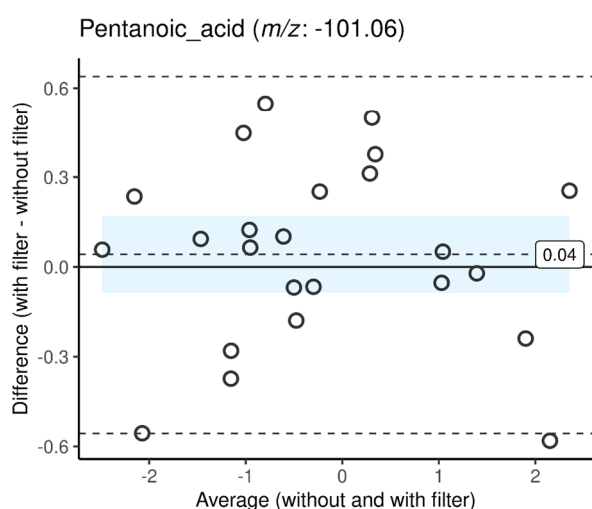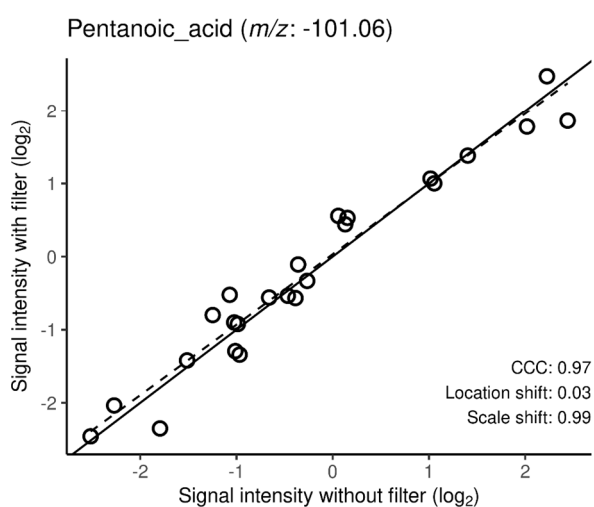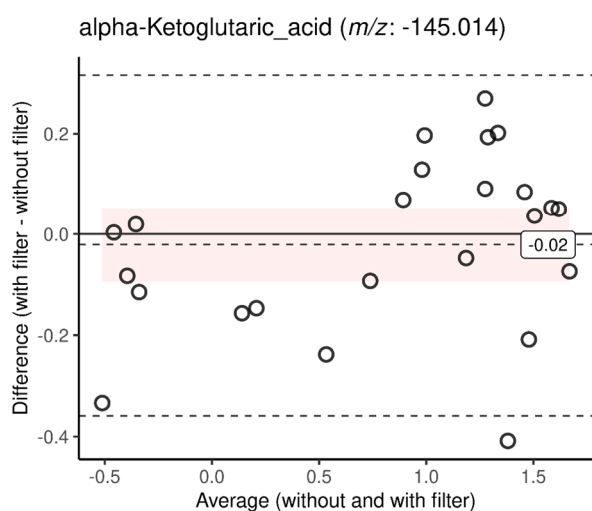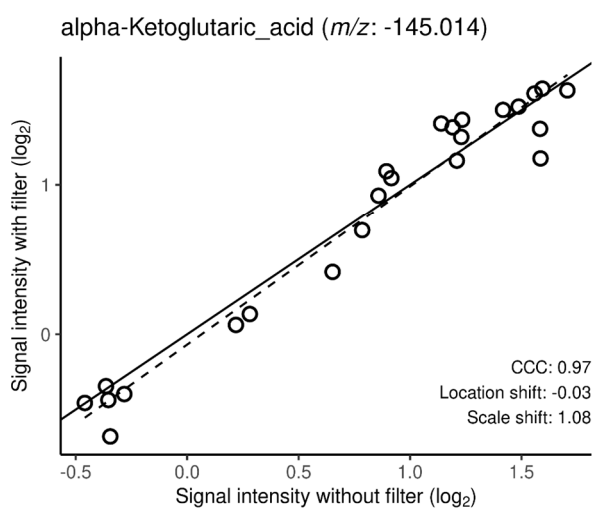

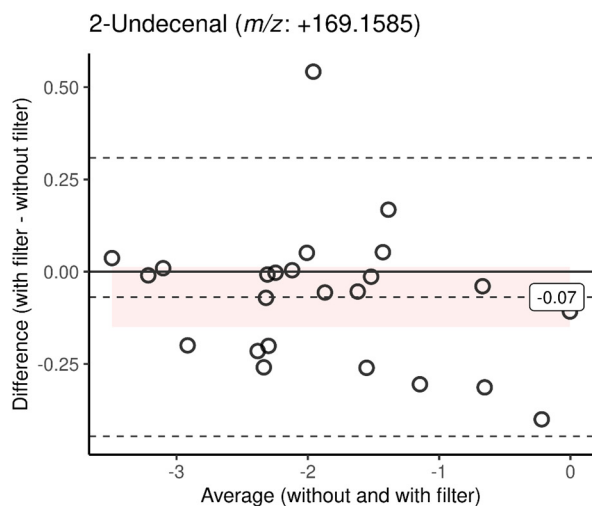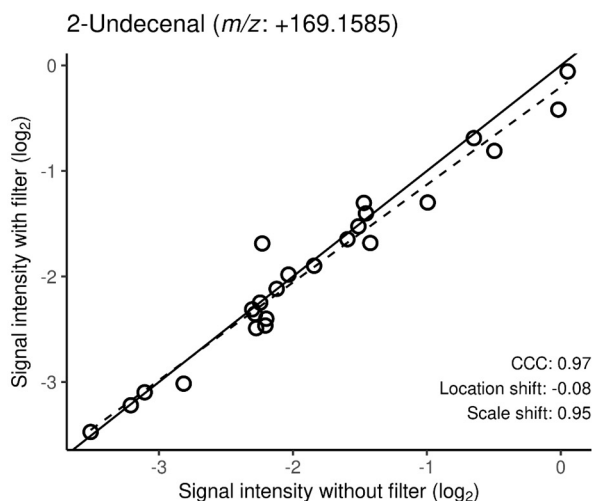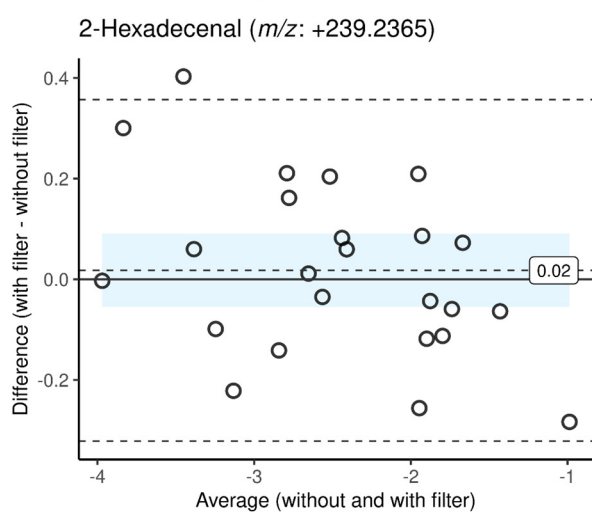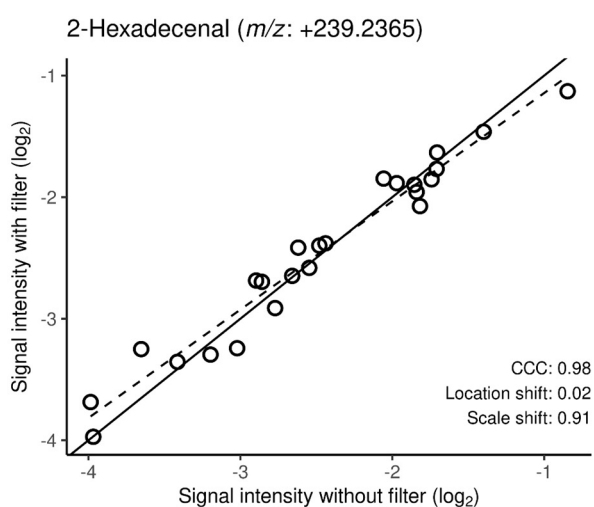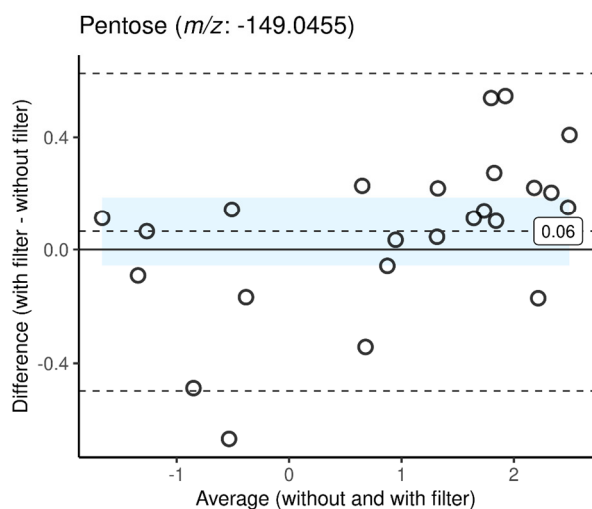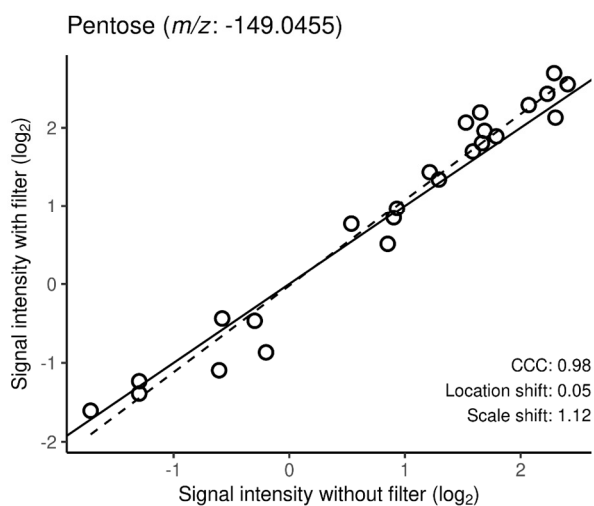

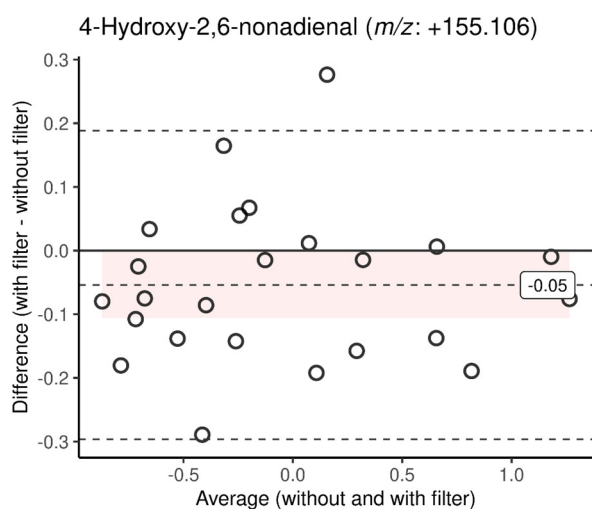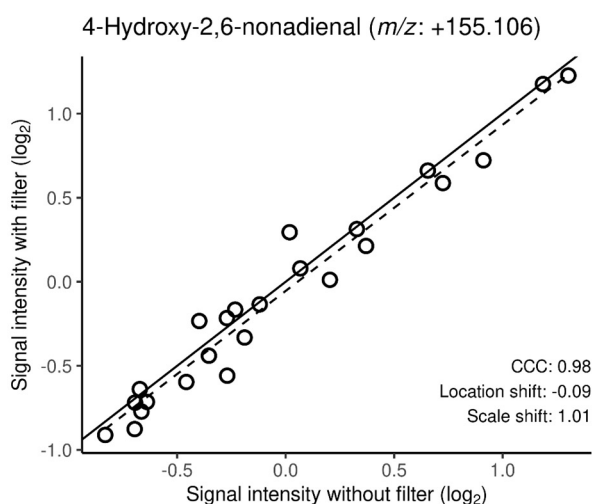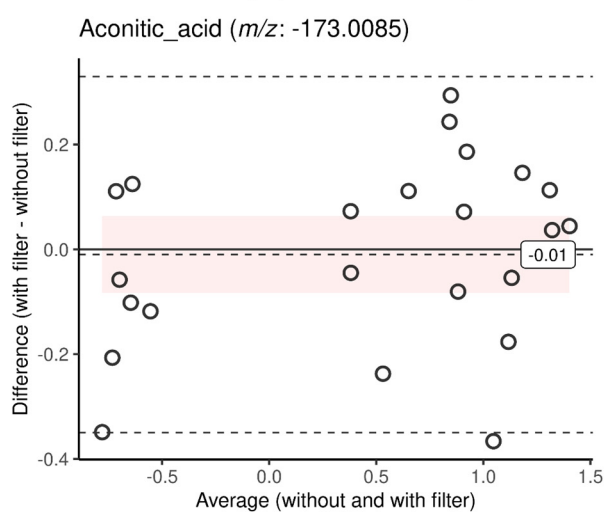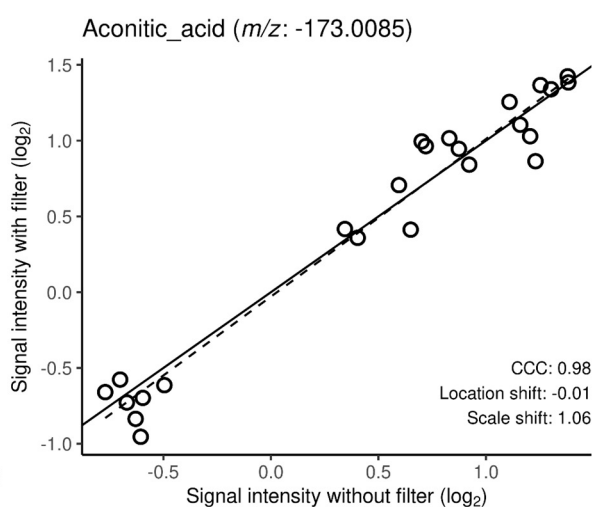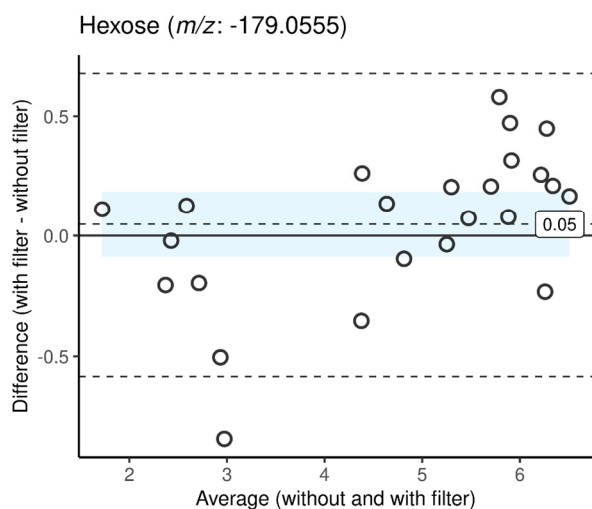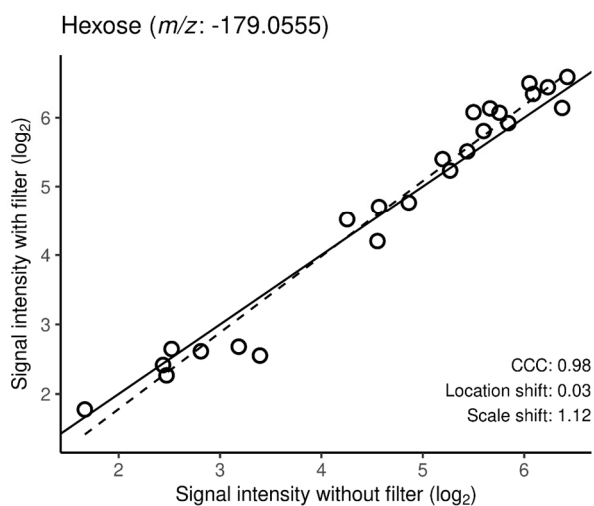

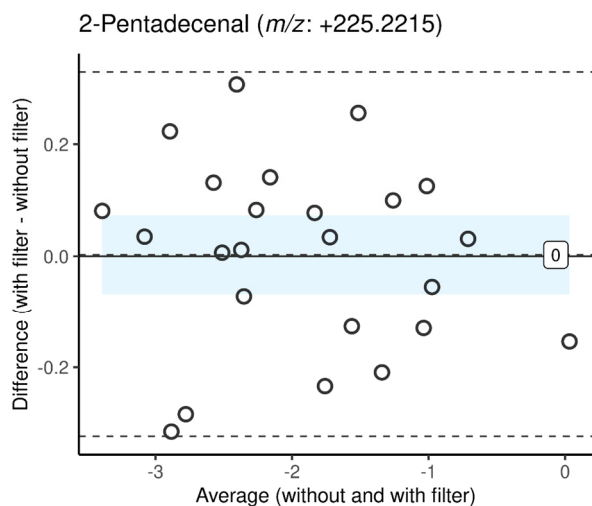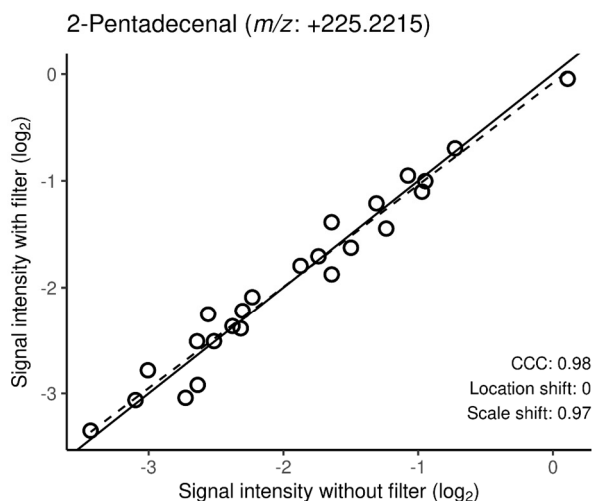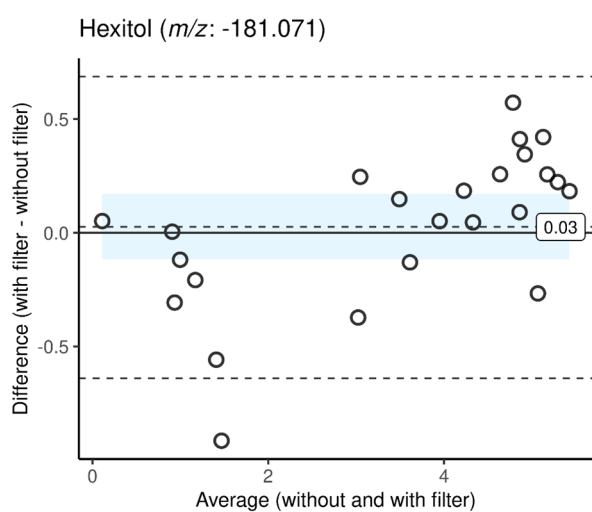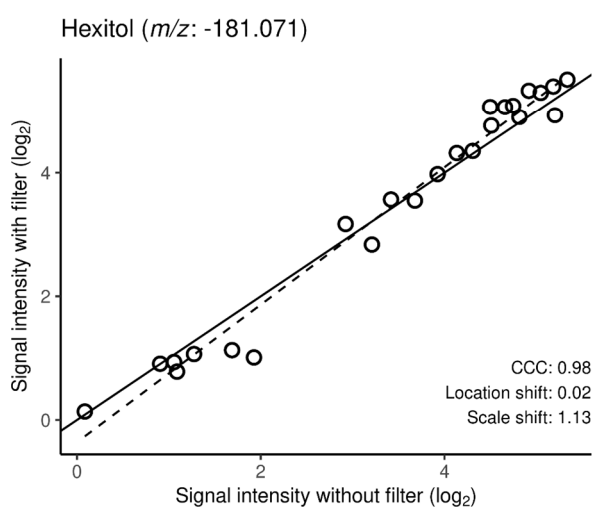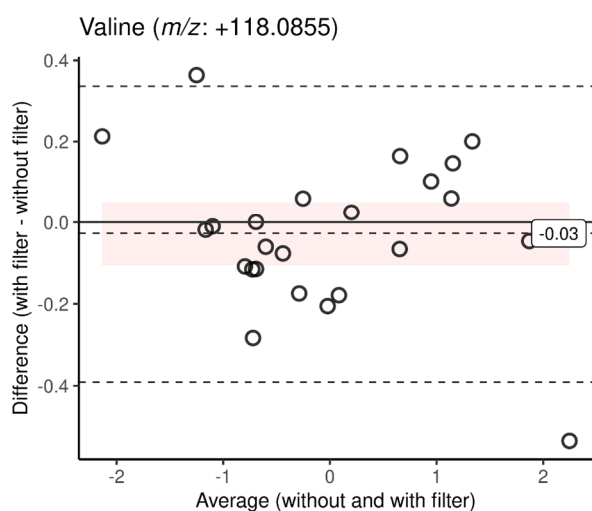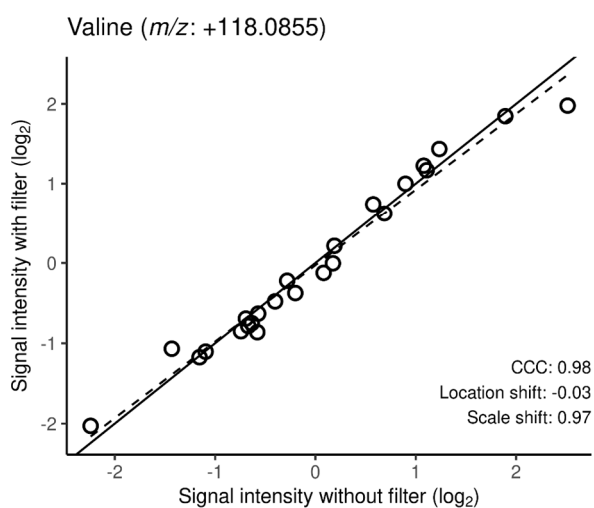



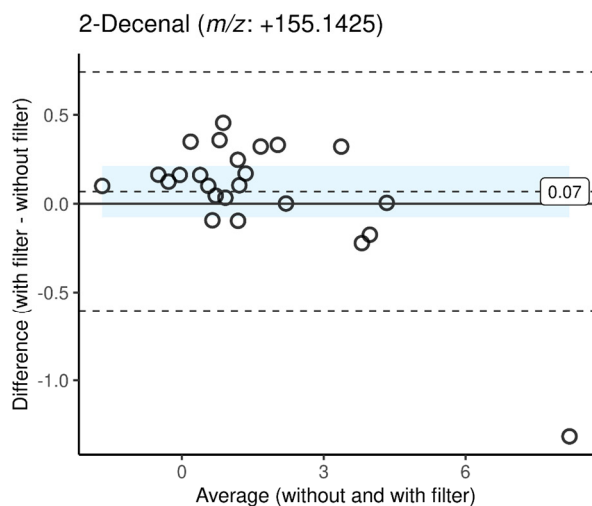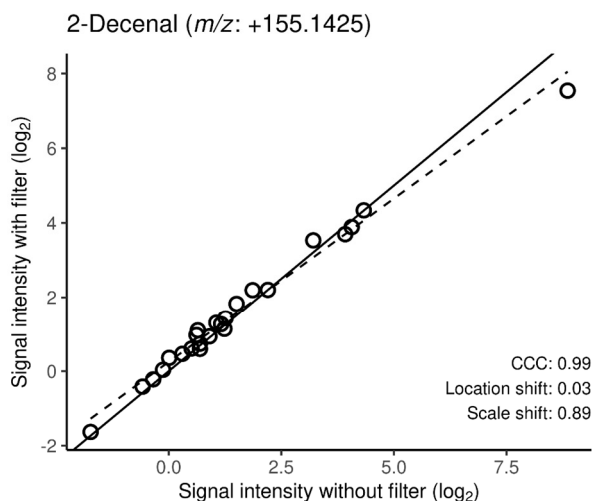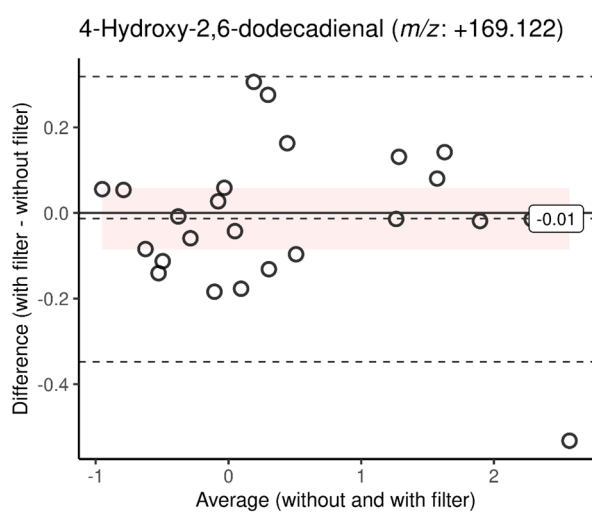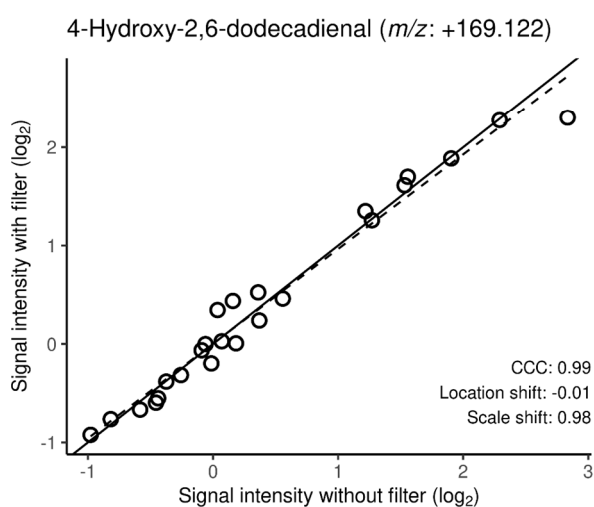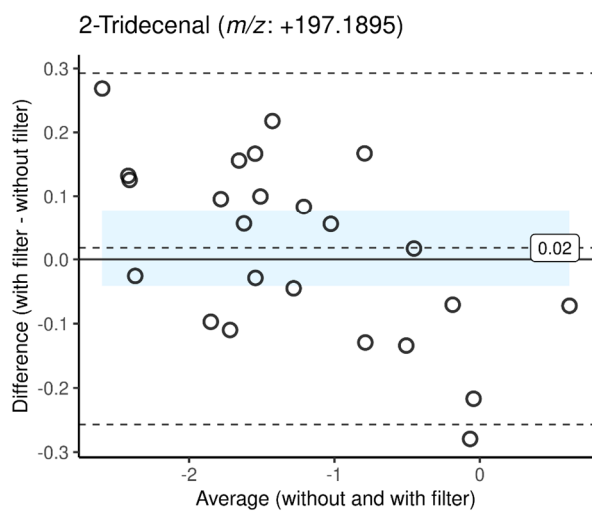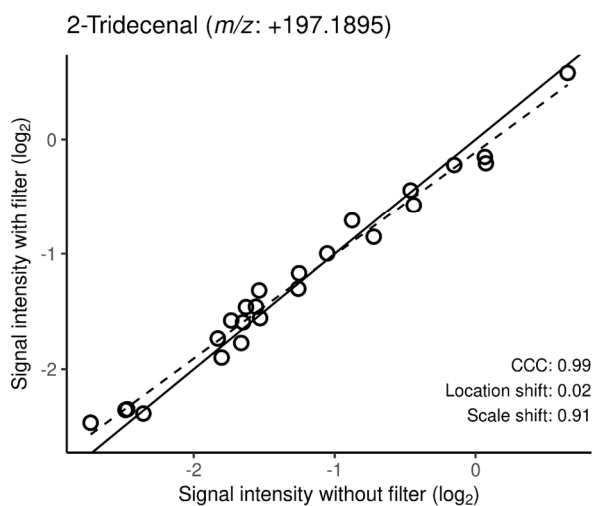

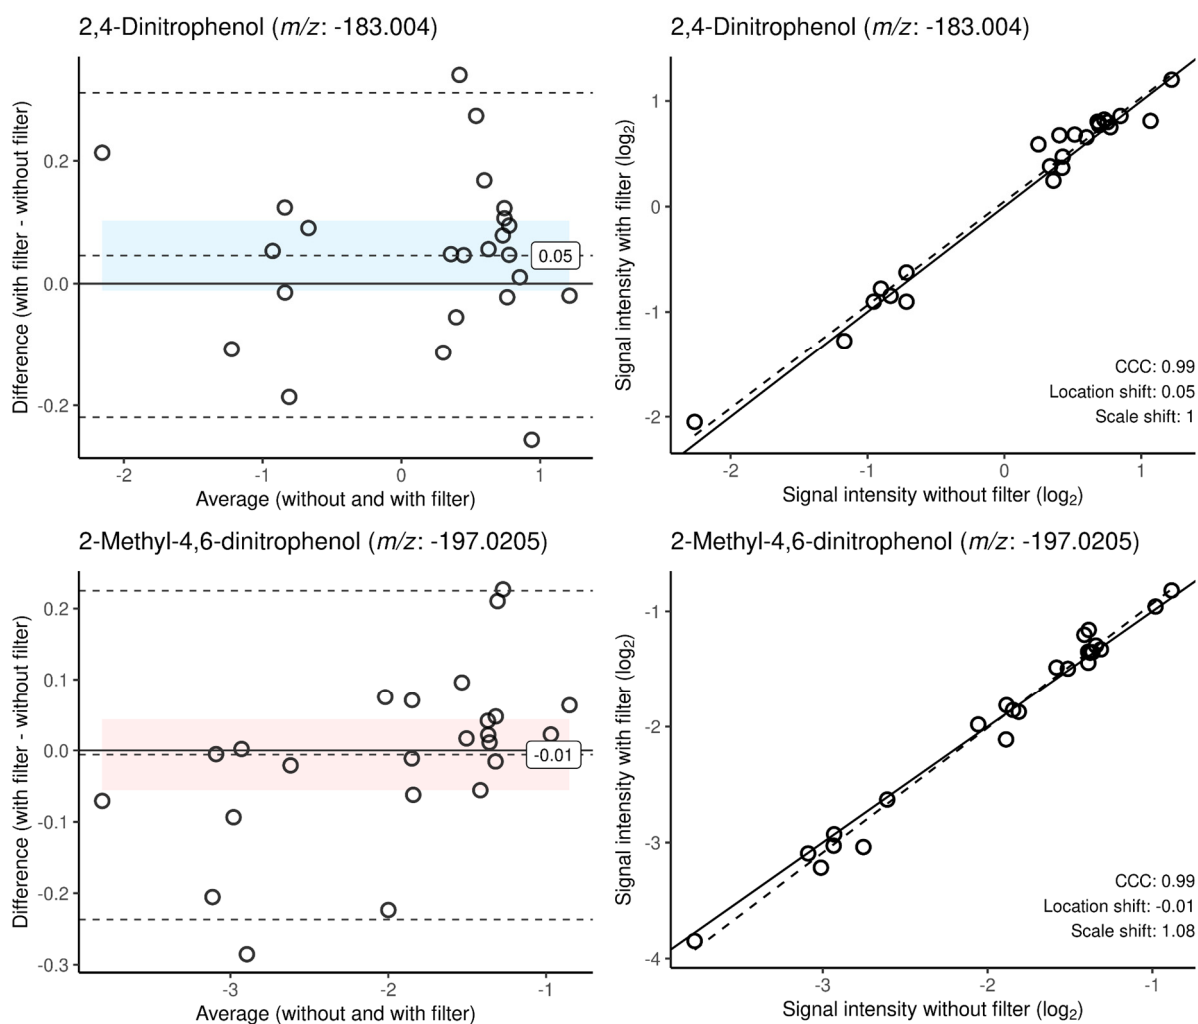

### 3.2 Figure S2

Bland-Altman and CCC plots for all detected contaminants in the exhaled breath profiles. For explanation of the plots see text of Figure S1.

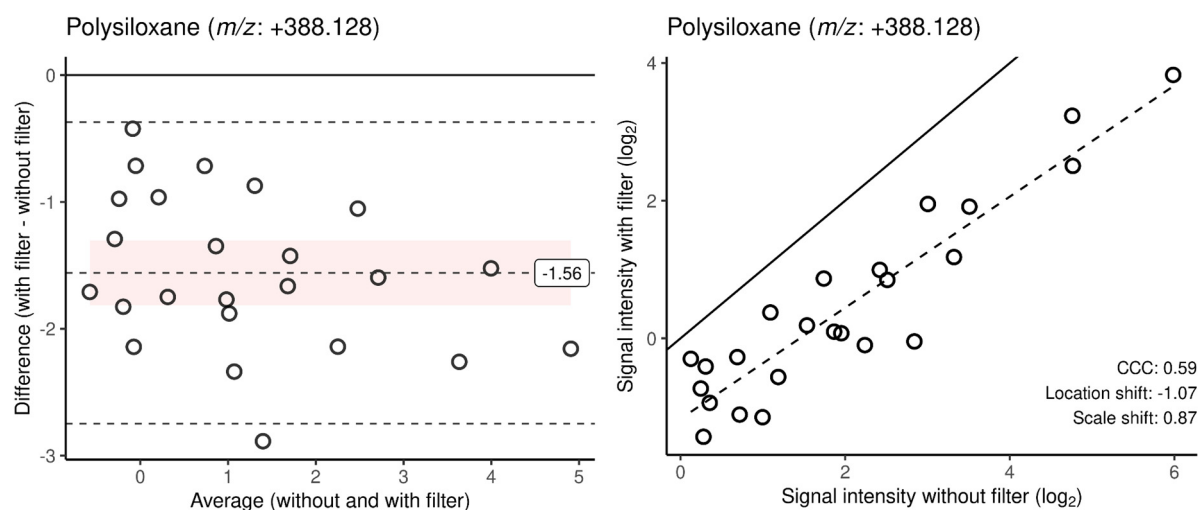

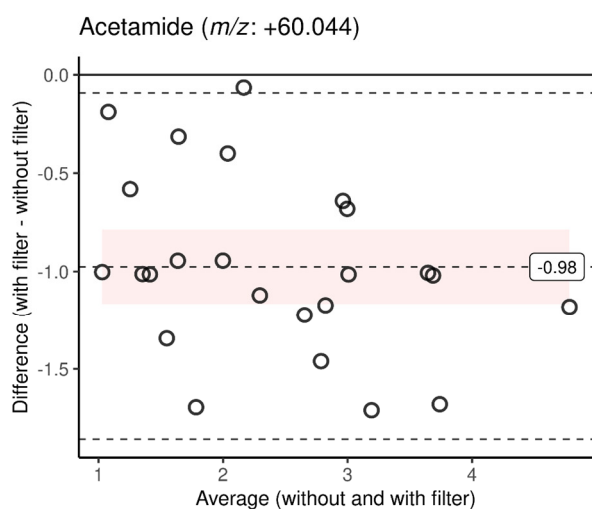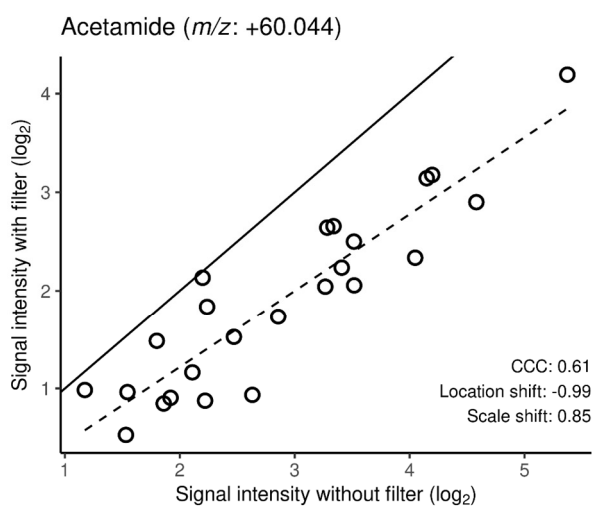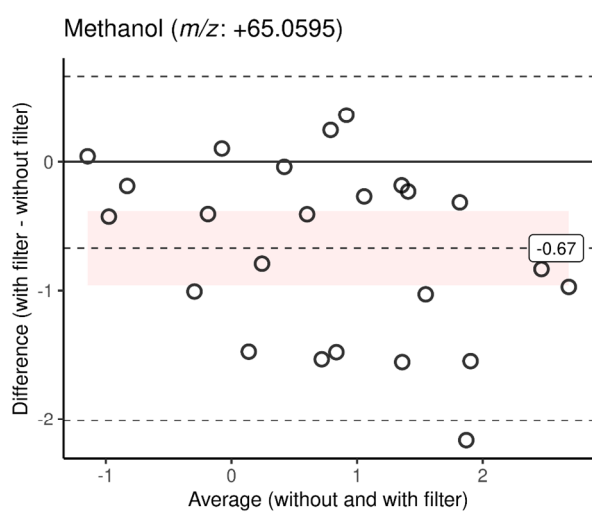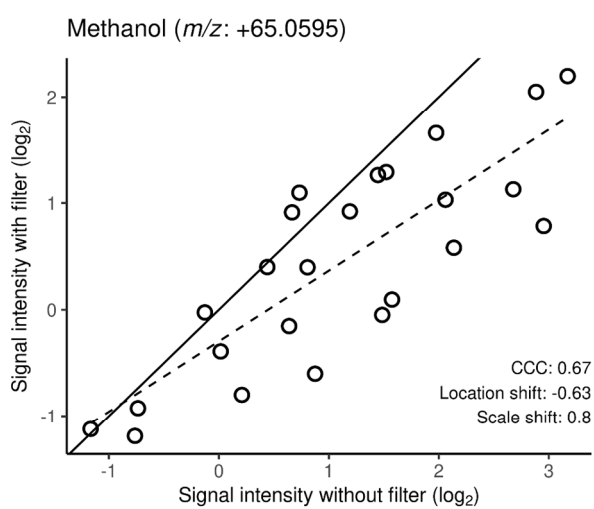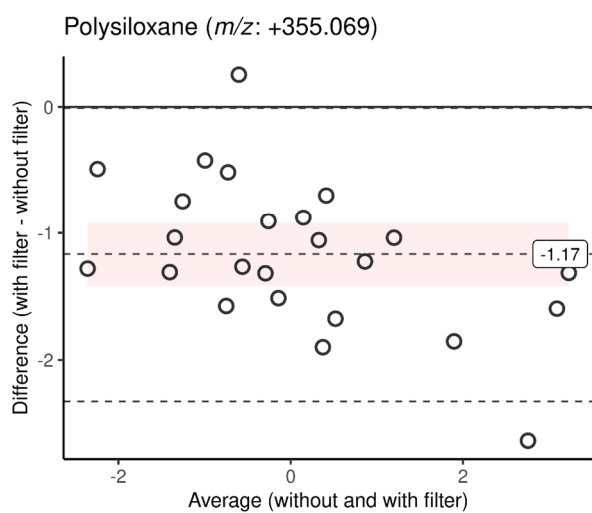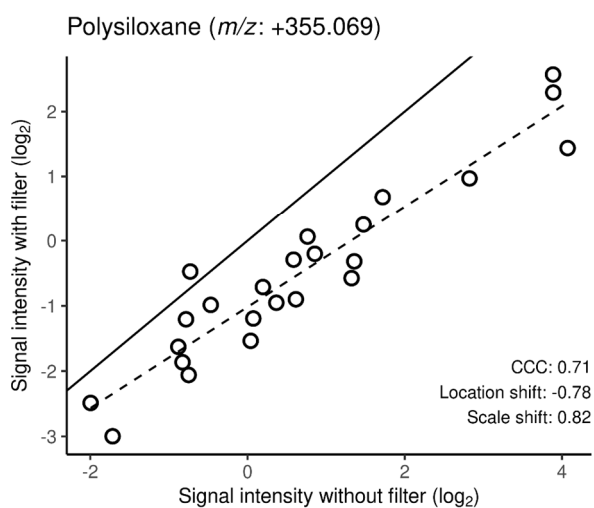

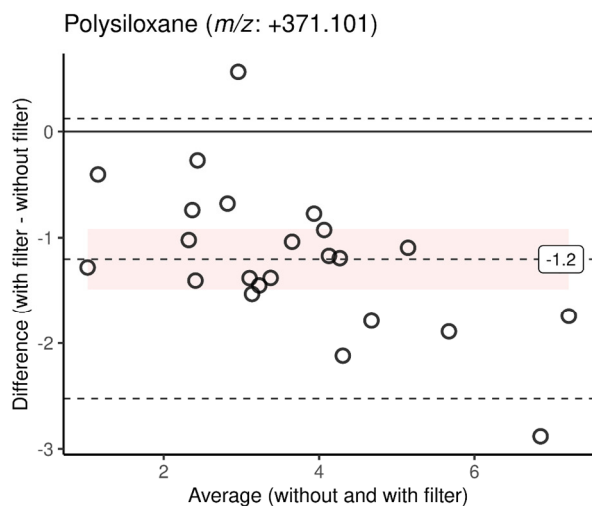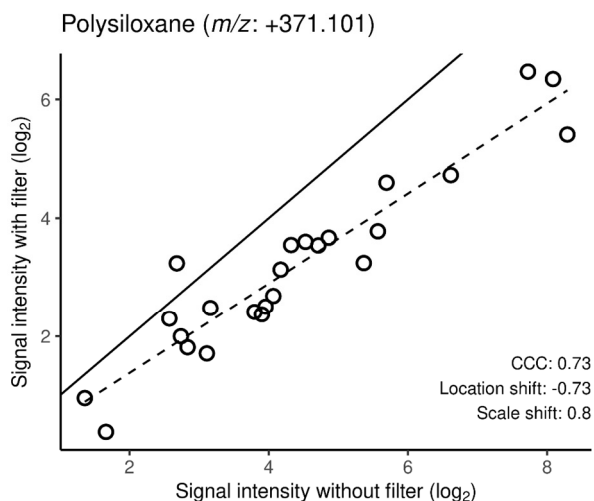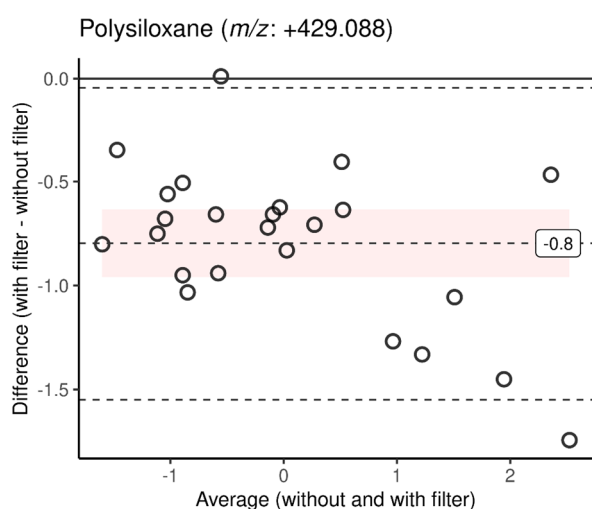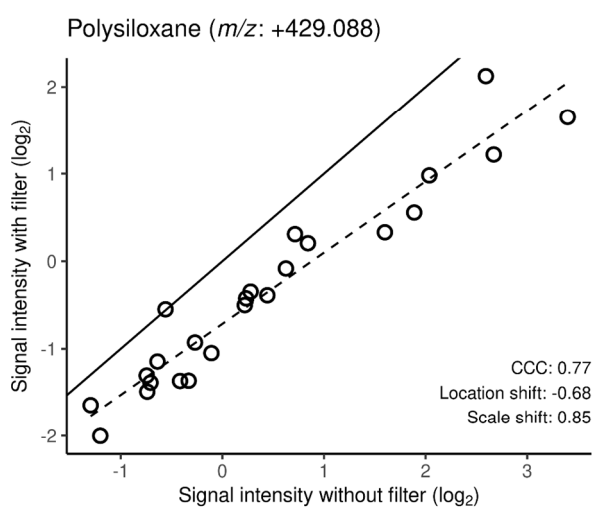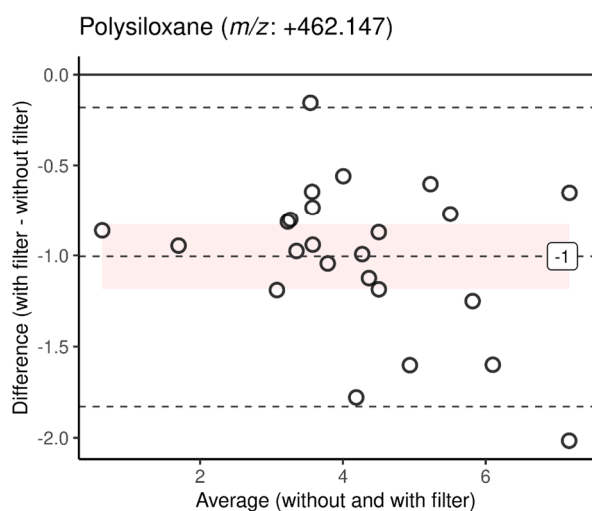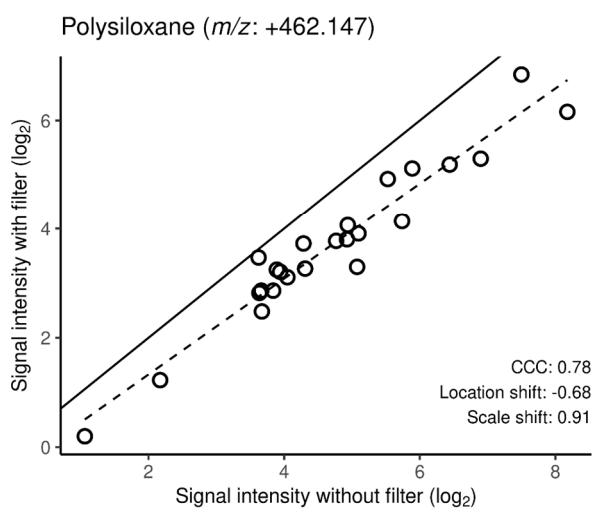

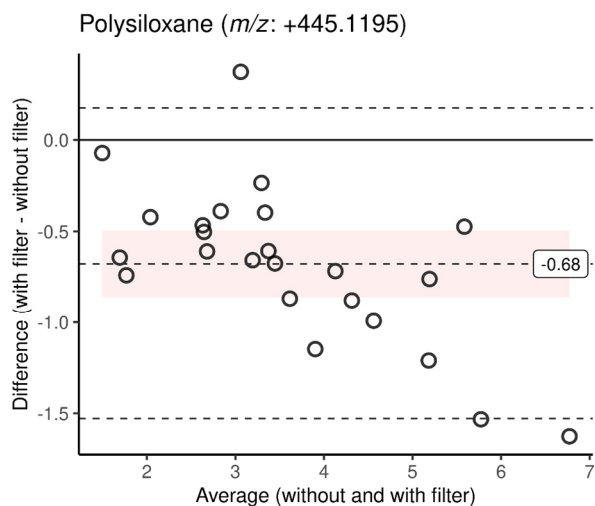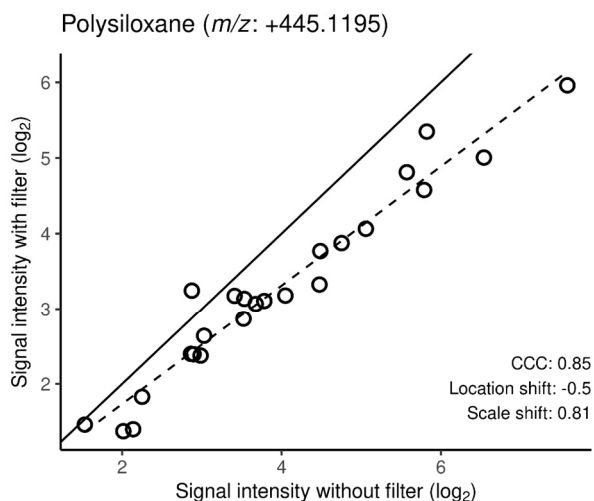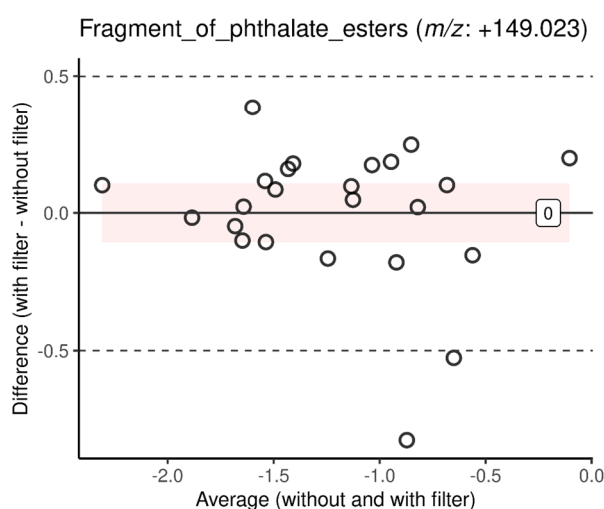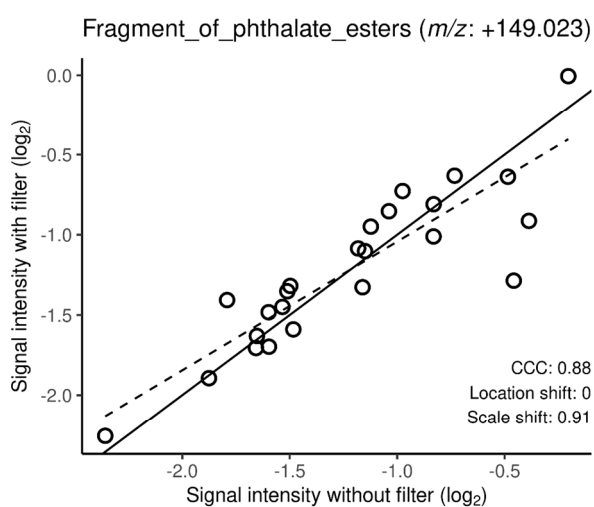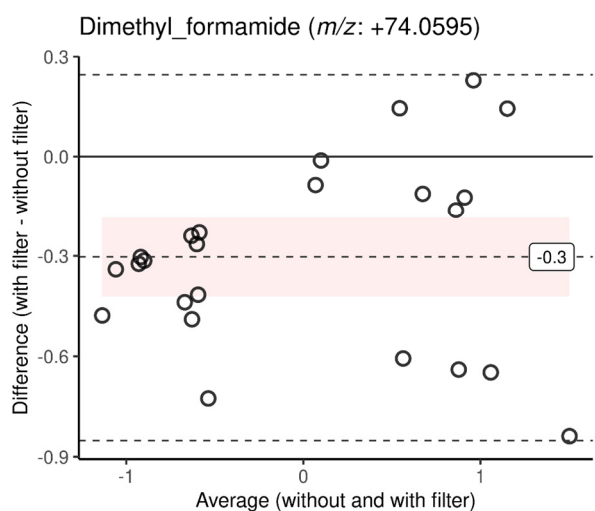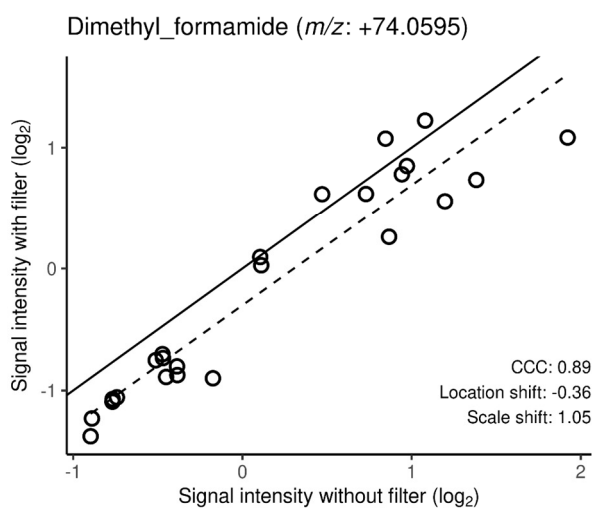

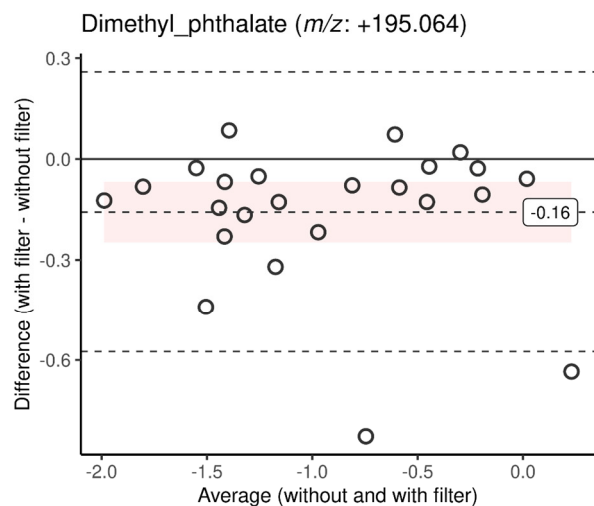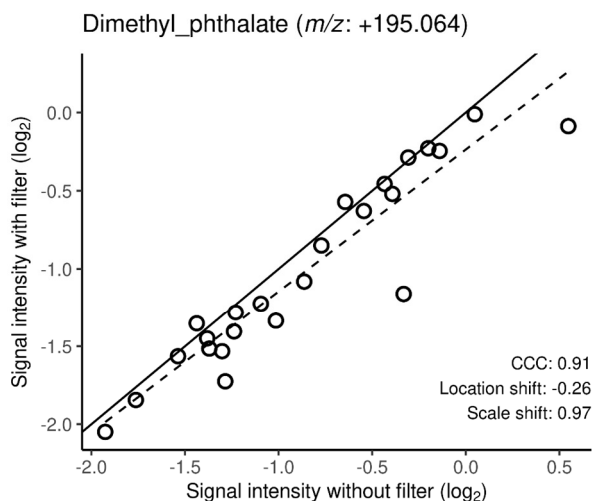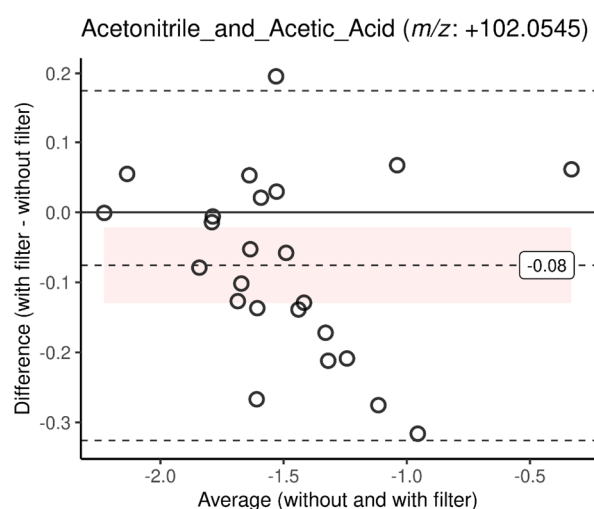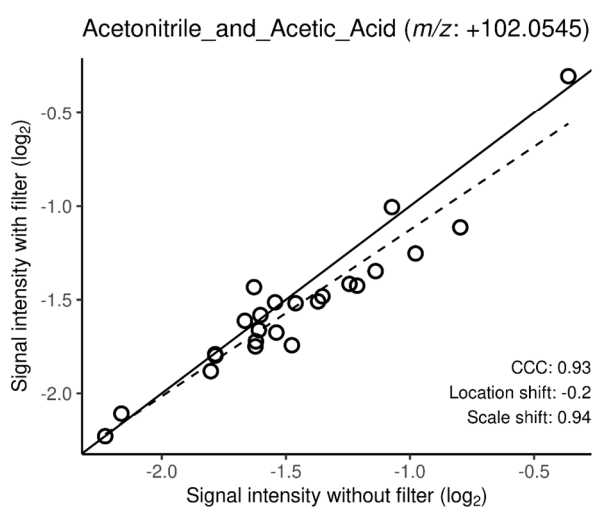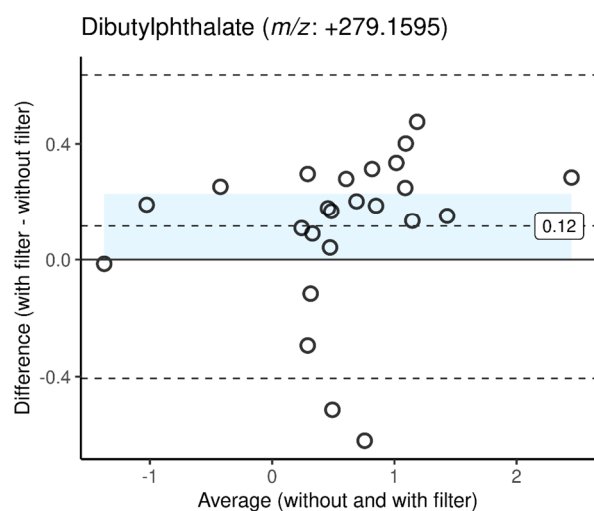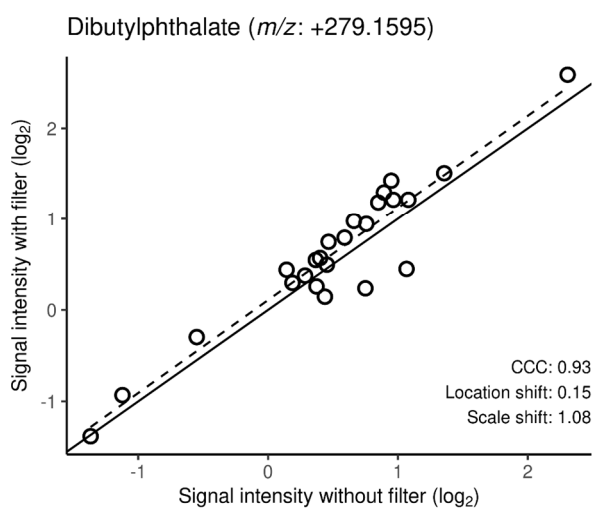

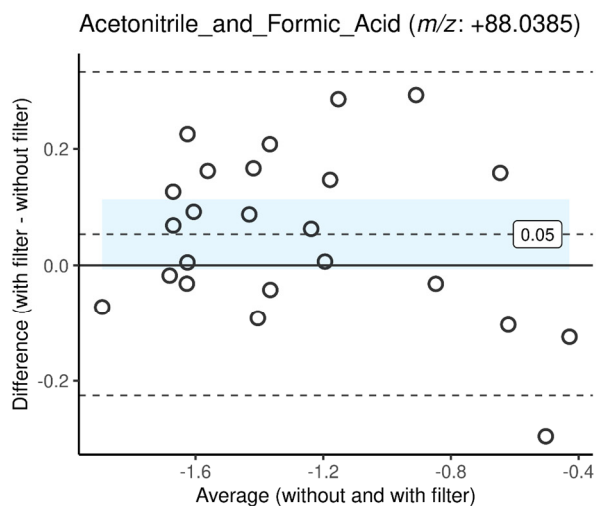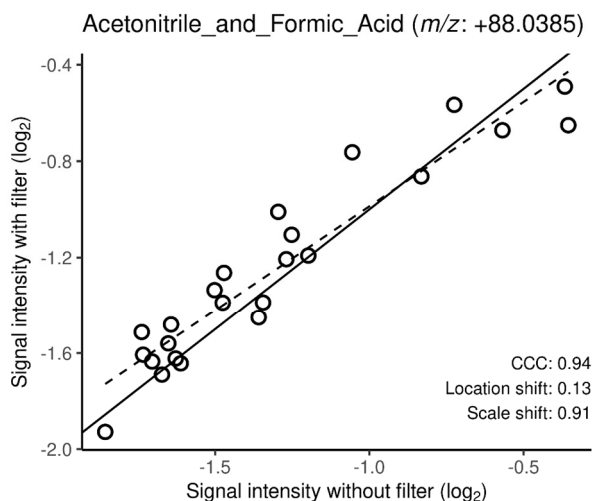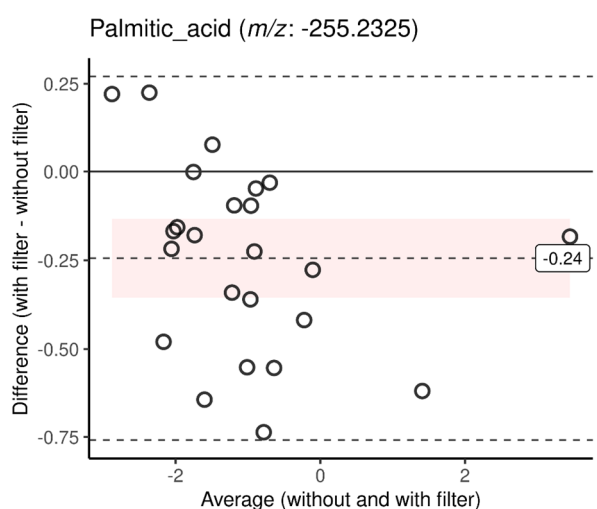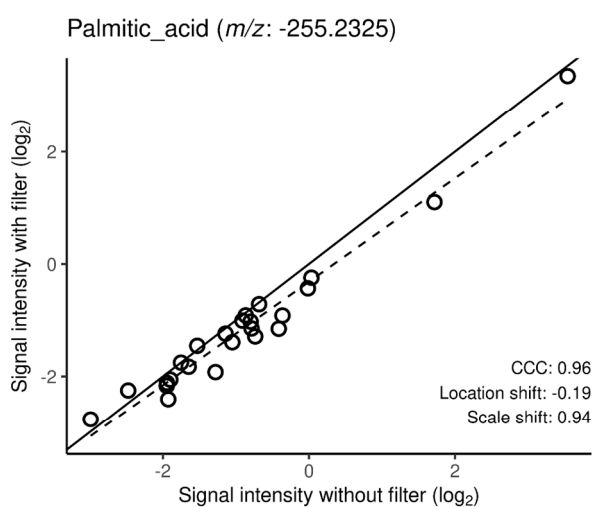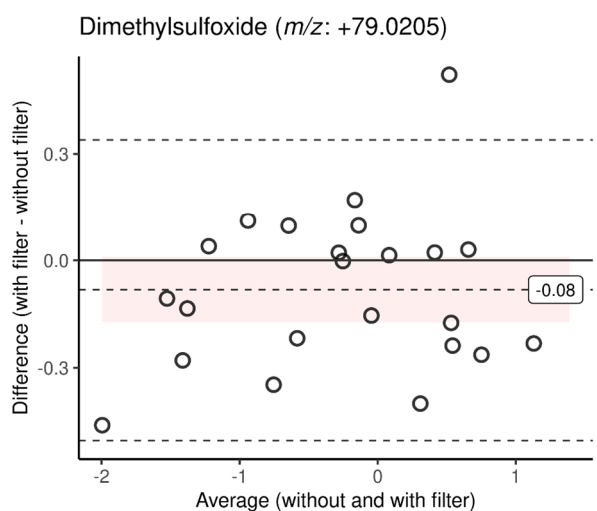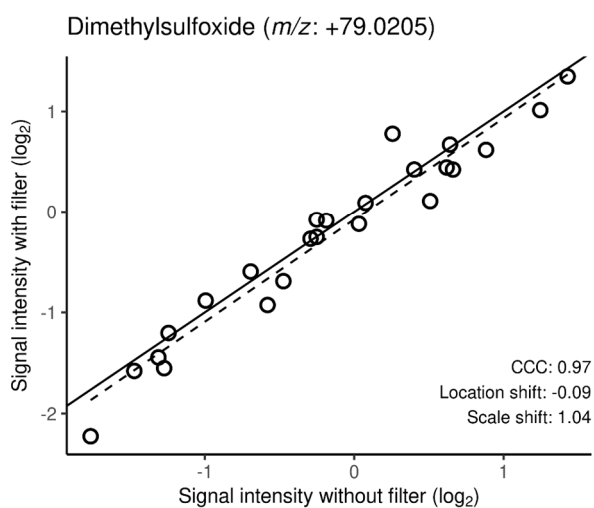

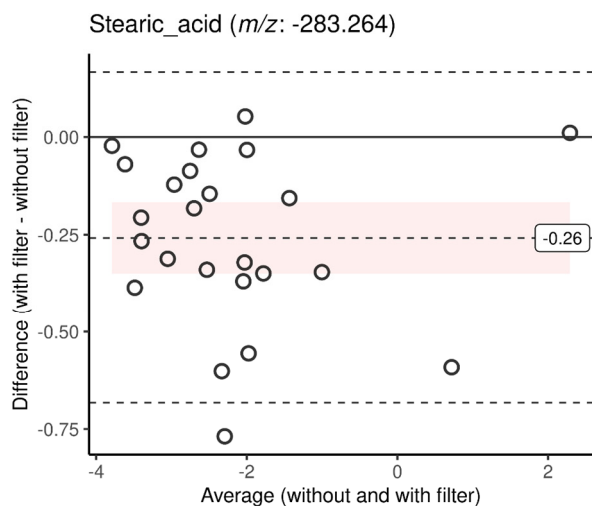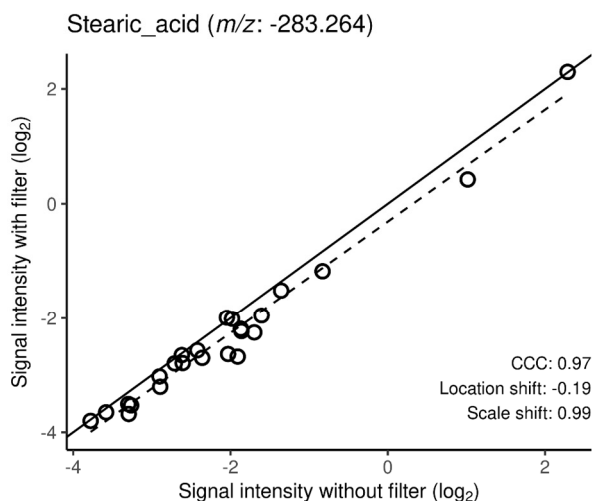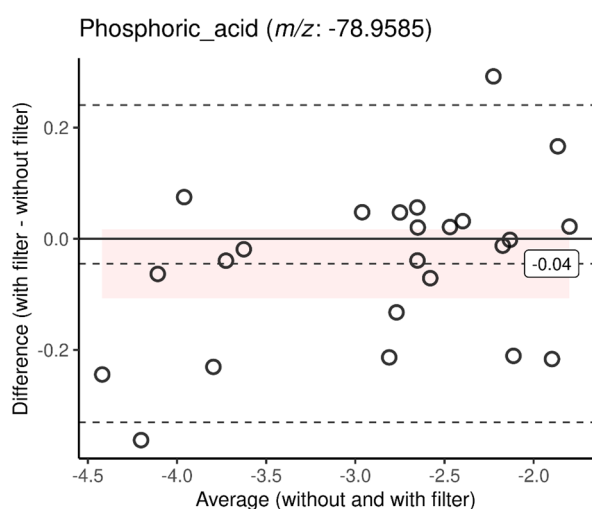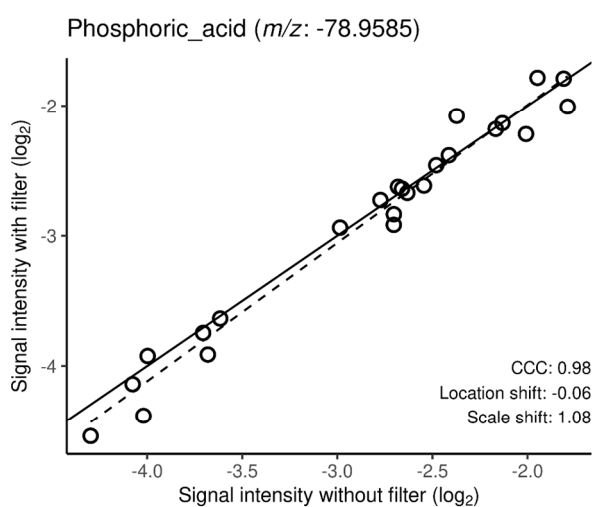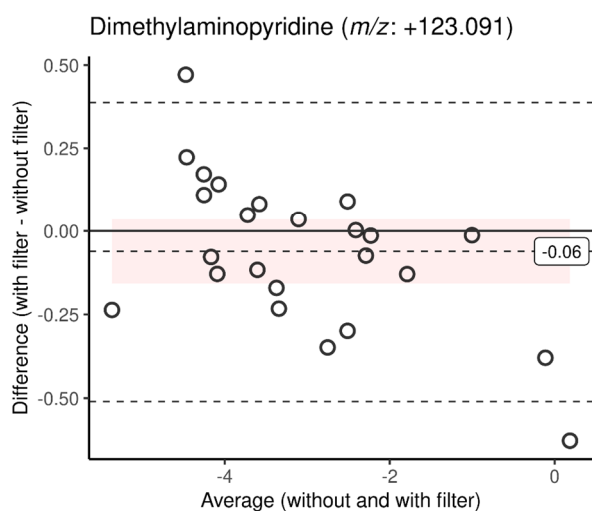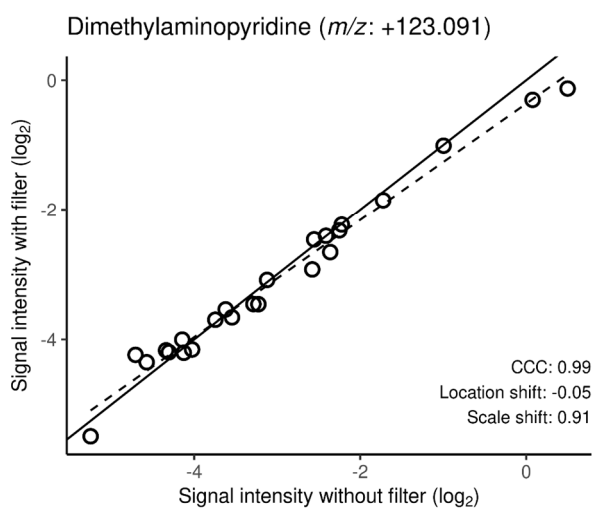



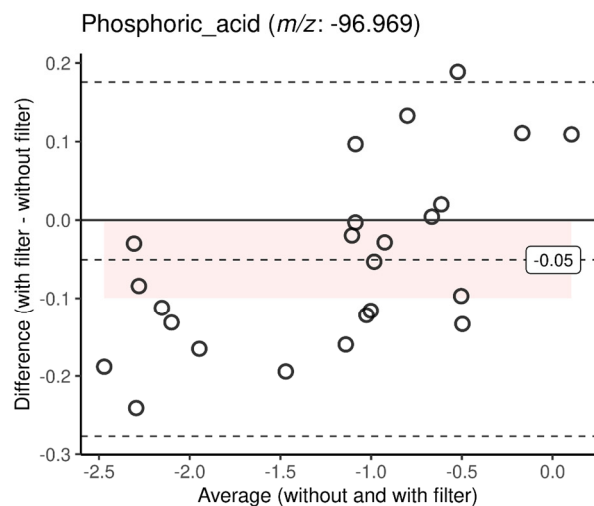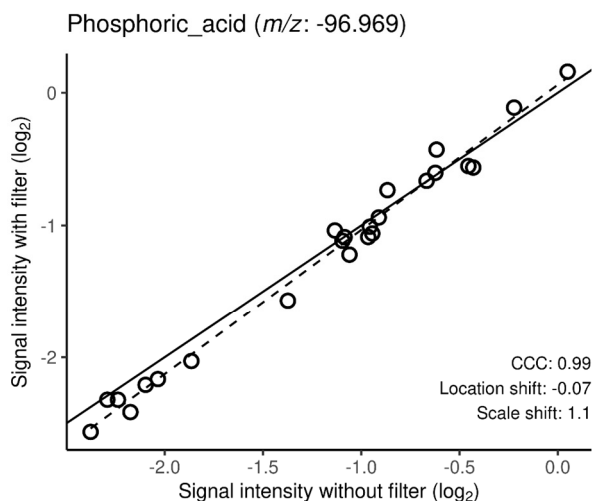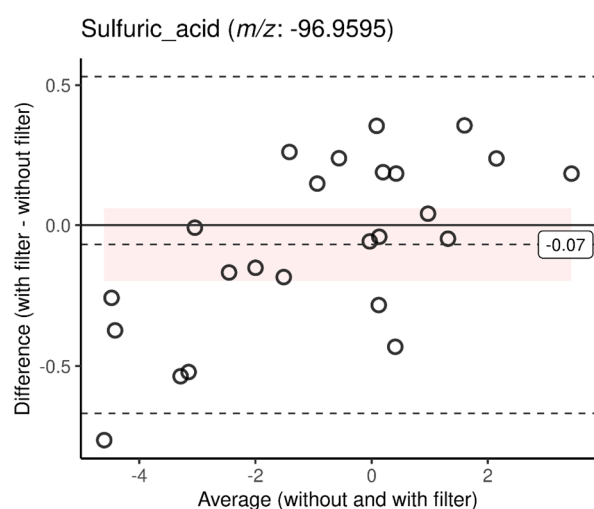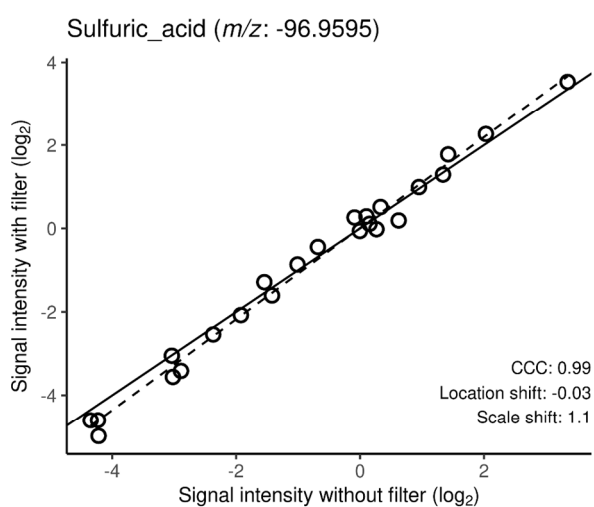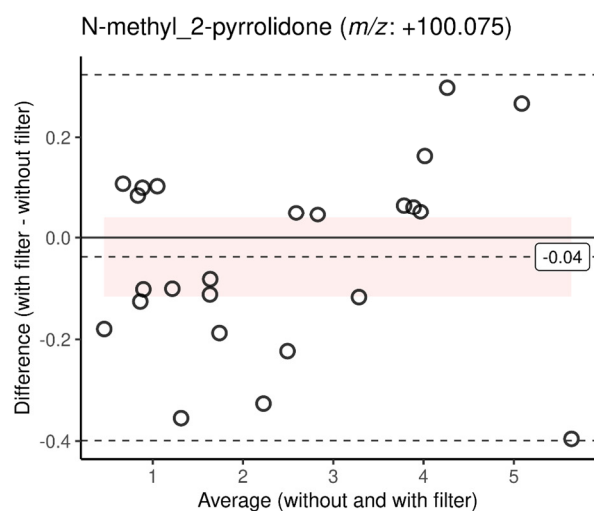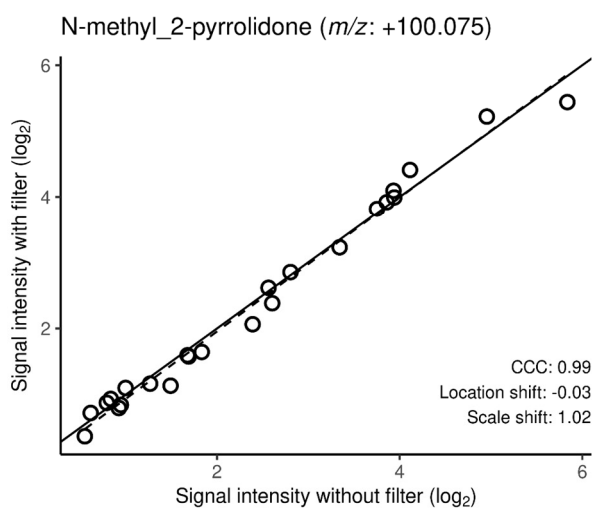

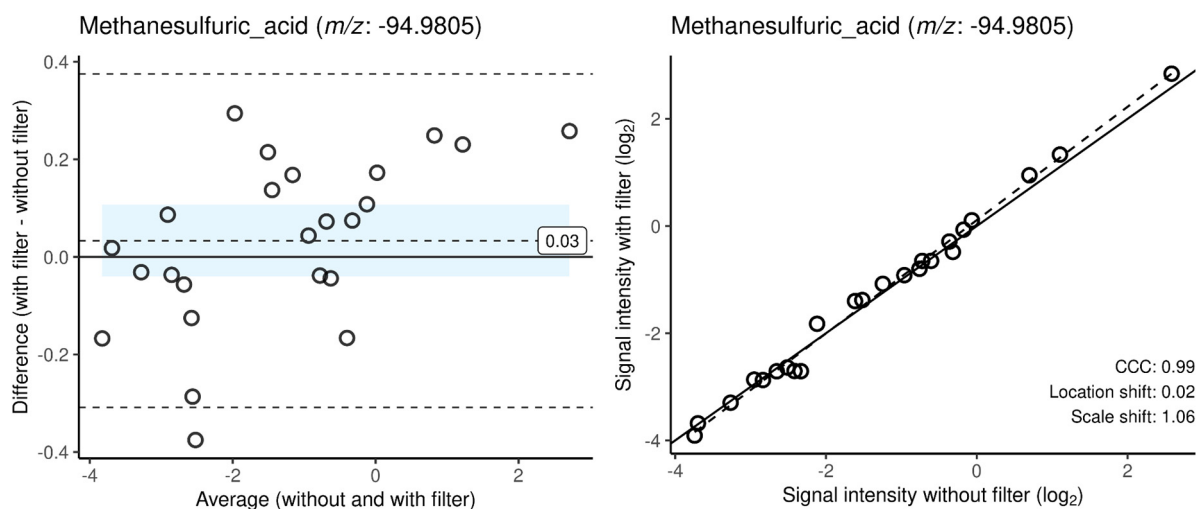

### 3.3 Figure S3

Plots consisting of contaminants found in ambient air samples measured immediately together with human breath samples (7 plot points). X-axis: within-subject signal intensity differences (without filter - with filter) of the corresponding  $m/z$  feature. Y-axis: signal intensities in humidified ambient air samples of the corresponding  $m/z$  feature. The dashed line represents the regression line with a gray area enclosed by the 95% confidence interval limits. Bottom right corner:  $R^2$  and adjusted  $R^2$ .

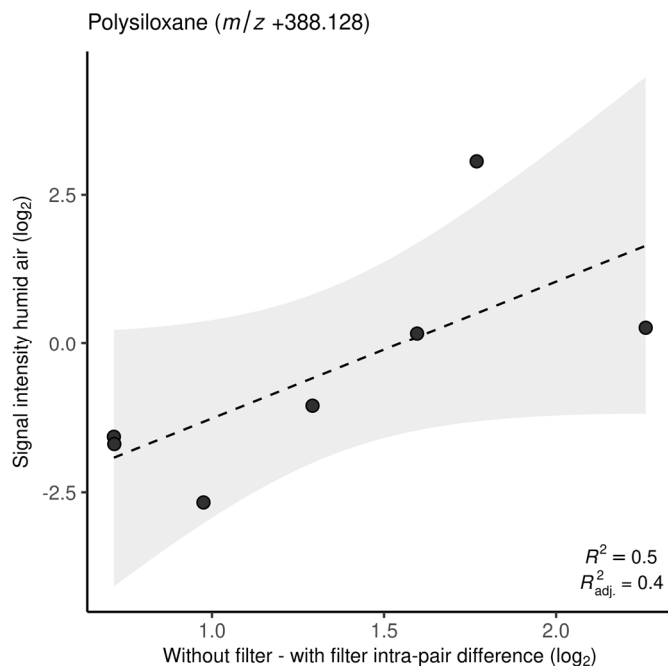

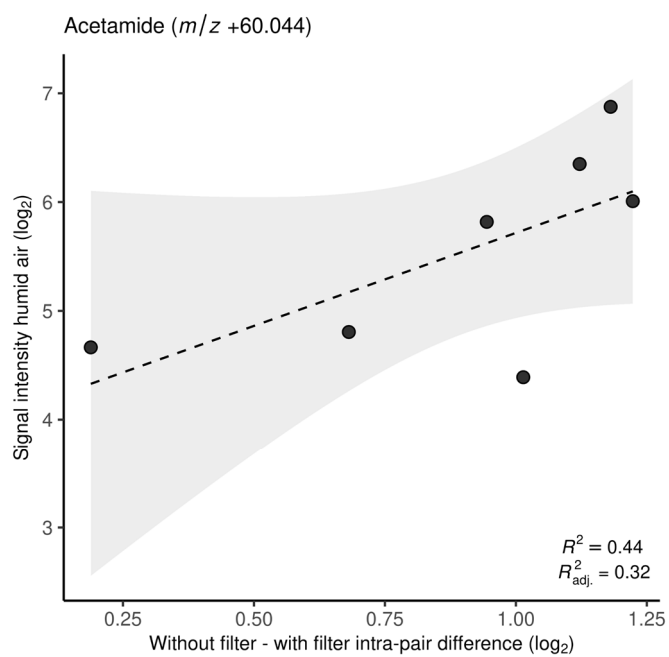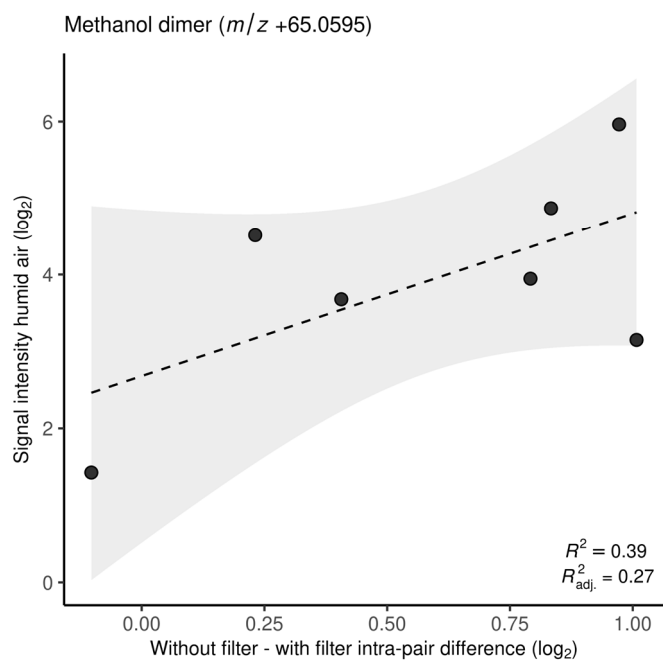

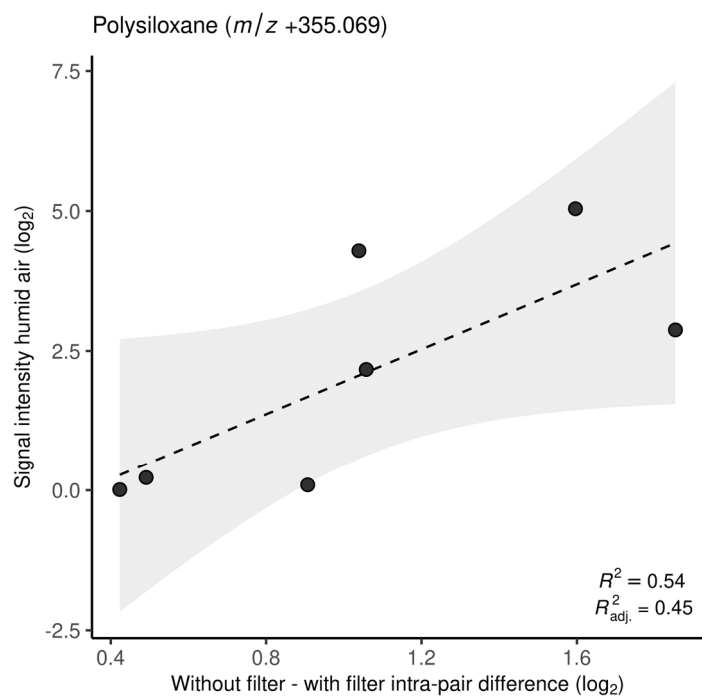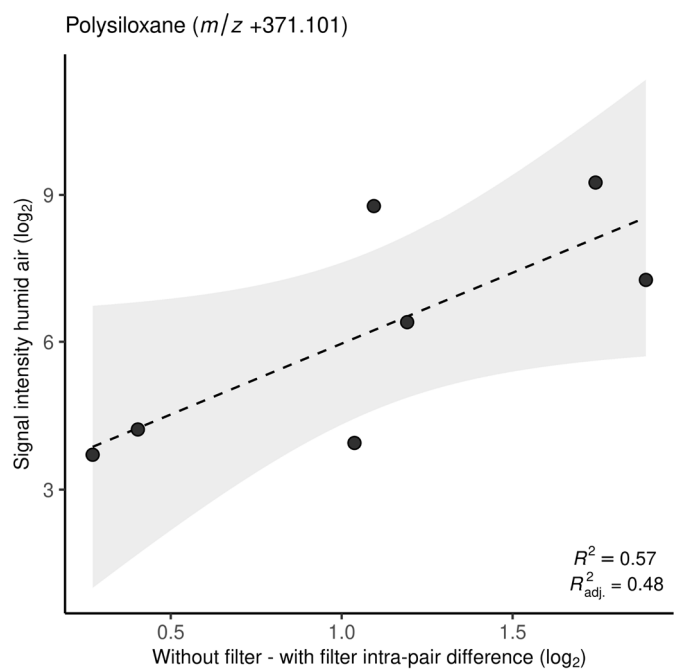

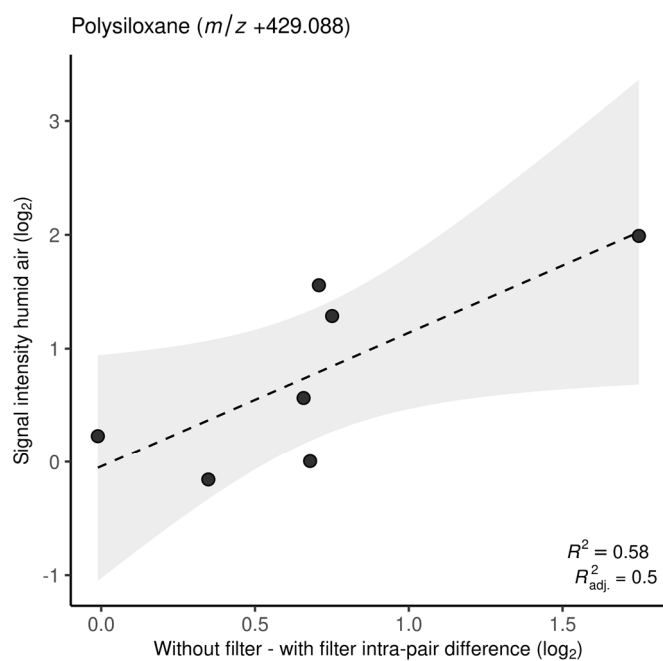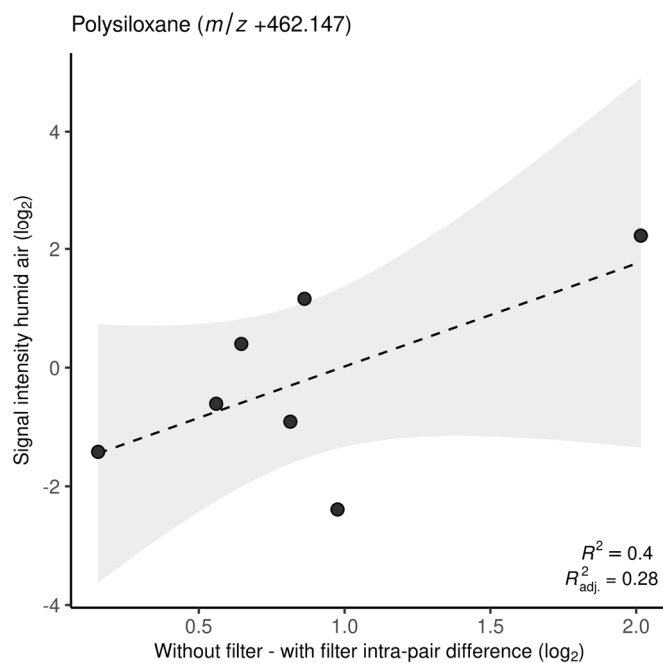

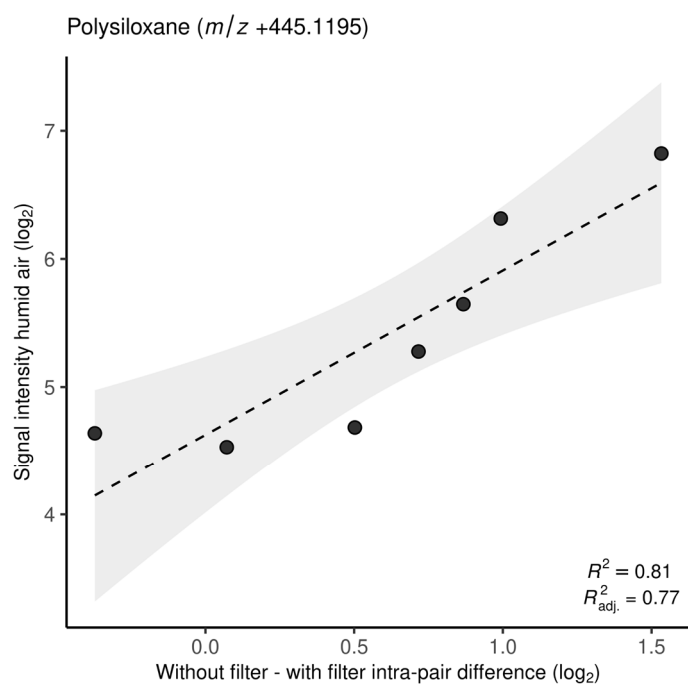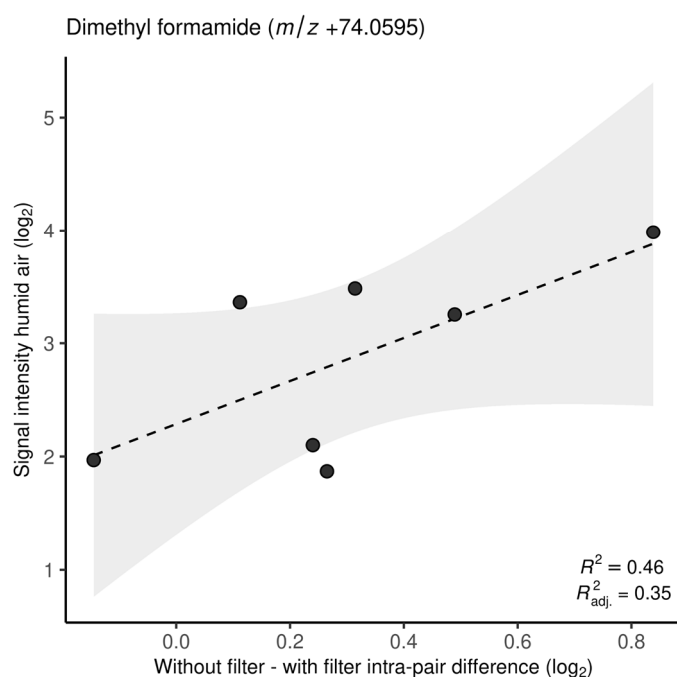

### 3.4 Figure S4

Plots consisting of metabolites found in ambient air samples measured immediately together with human breath samples (7 plot points). X-axis: within-subject signal intensity differences (without filter - with filter) of the corresponding  $m/z$  feature. Y-axis: signal intensities in humidified ambient air samples of the corresponding  $m/z$  feature. The dashed line represents the regression line with a gray area enclosed by the 95% confidence interval limits. Bottom right corner:  $R^2$  and adjusted  $R^2$ .

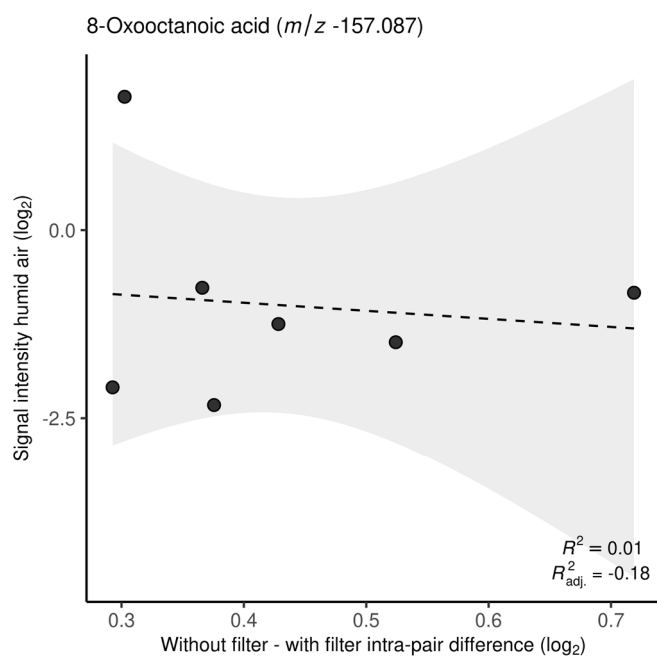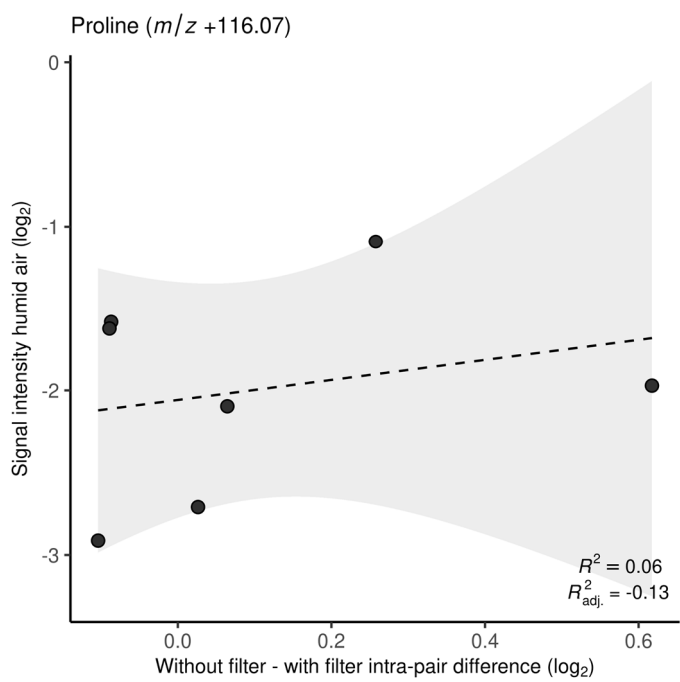

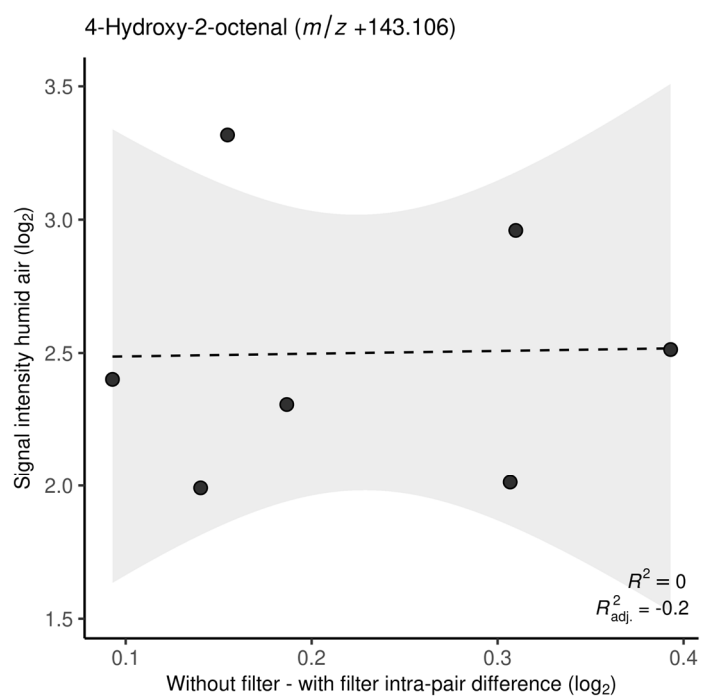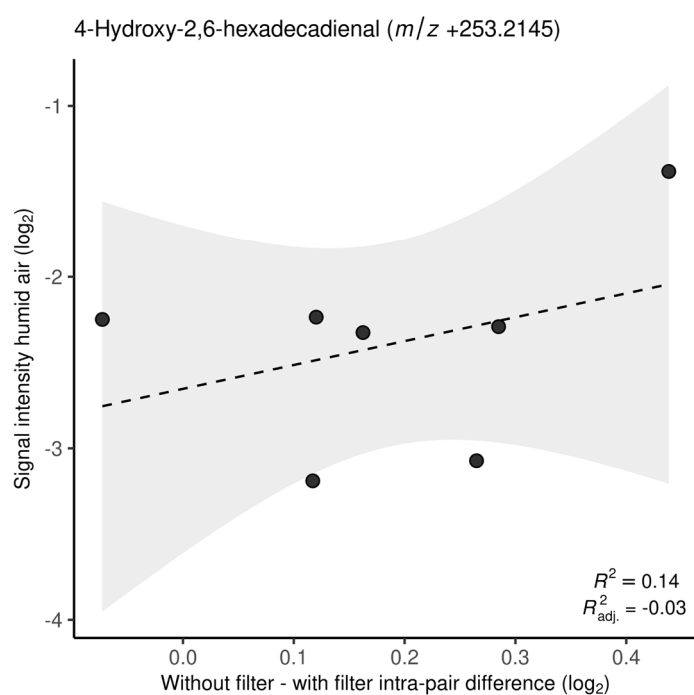



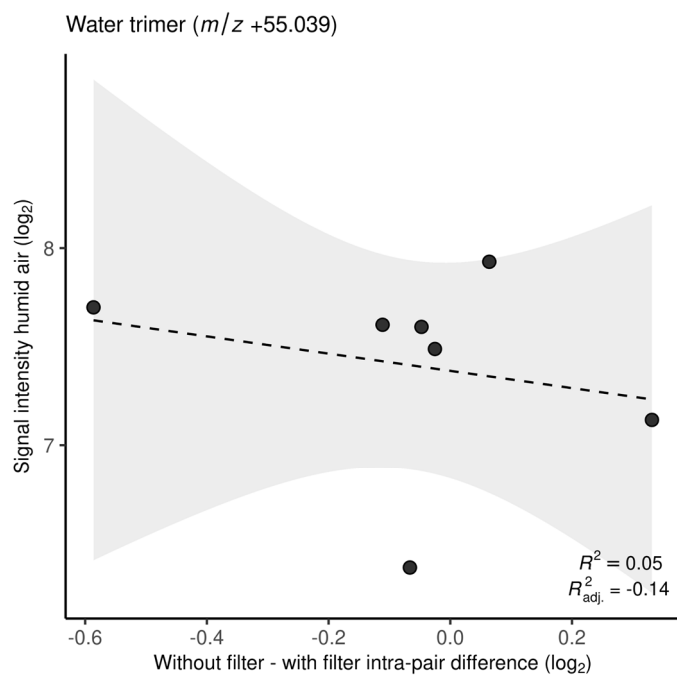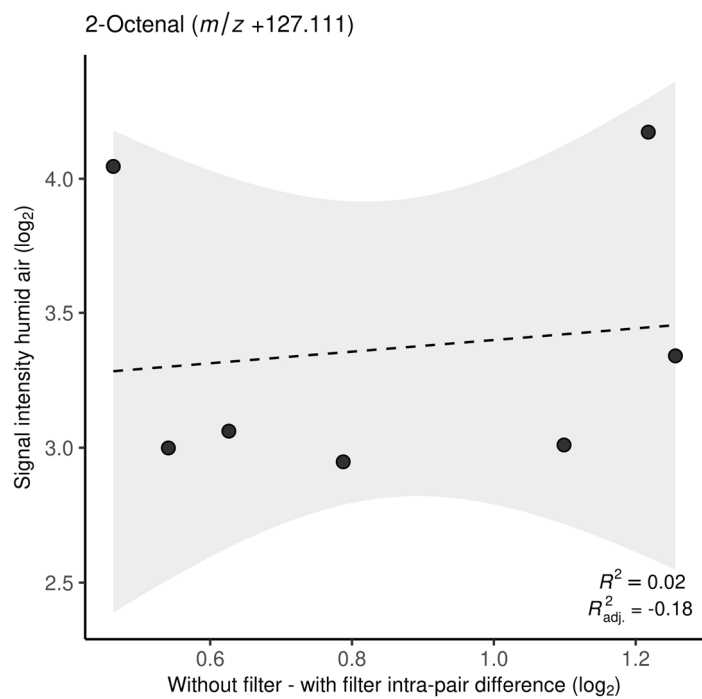

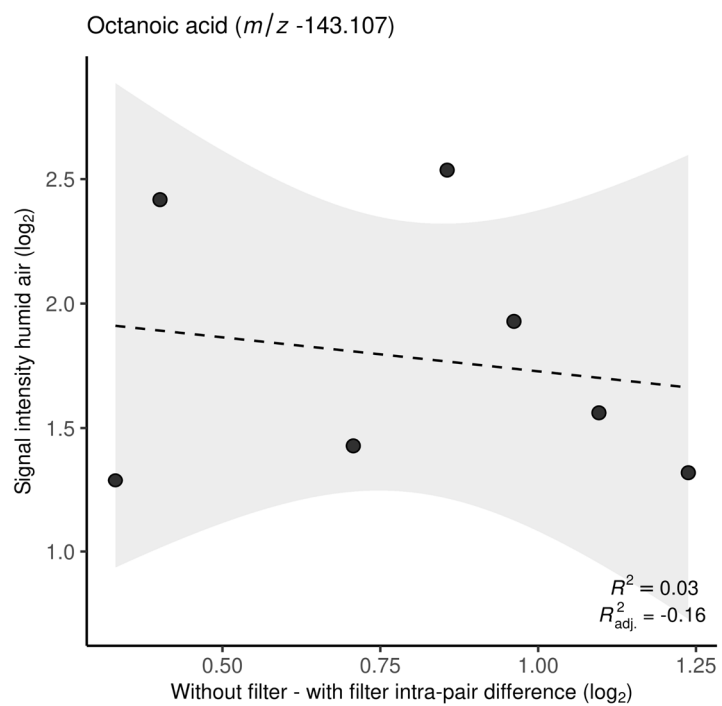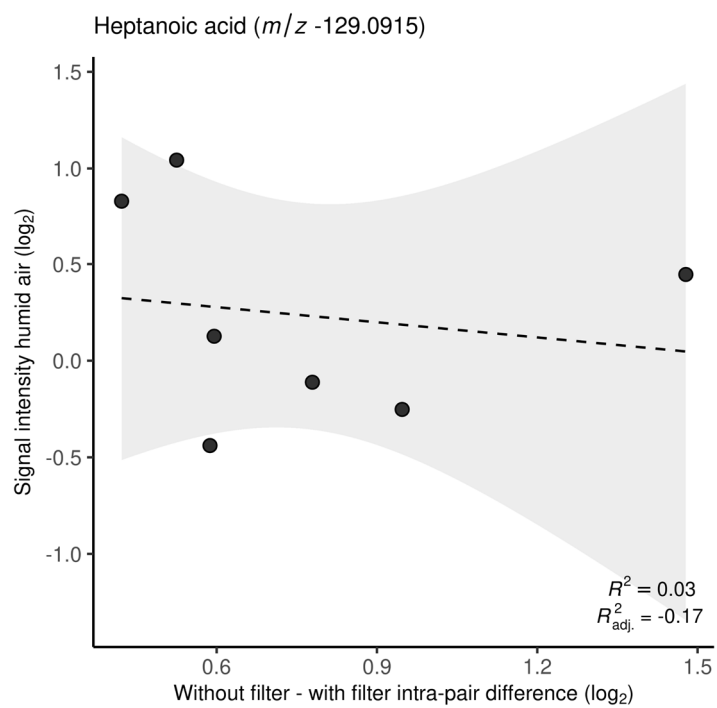

# References

1. Weber, R.; Haas, N.; Baghdasaryan, A.; Bruderer, T.; Inci, D.; Micic, S.; Perkins, N.; Spinaz, R.; Zenobi, R.; Moeller, A. Volatile Organic Compound Breath Signatures of Children with Cystic Fibrosis by Real-Time SESI-HRMS. *ERJ Open Res* **2020**, *6*, 00171–02019.
2. Kaeslin, J.; Micic, S.; Weber, R.; Müller, S.; Perkins, N.; Berger, C.; Zenobi, R.; Bruderer, T.; Moeller, A. Differentiation of Cystic Fibrosis-Related Pathogens by Volatile Organic Compound Analysis with Secondary Electrospray Ionization Mass Spectrometry. *Metabolites* **2021**, *11*, 773.
3. Weber, R.; Streckenbach, B.; Welt, L.; Inci, D.; Kohler, M.; Perkins, N.; Zenobi, R.; Micic, S.; Moeller, A. Metabolic Signatures for Allergic Asthma in Children by On-Line Breath Analysis. *Submitted to the Journal of Allergy and Clinical Immunology* **2022**.
4. Gaugg, M.T.; Engler, A.; Nussbaumer-Ochsner, Y.; Bregy, L.; Stöberl, A.S.; Gaisl, T.; Bruderer, T.; Zenobi, R.; Kohler, M.; Martinez-Lozano Sinues, P. Metabolic Effects of Inhaled Salbutamol Determined by Exhaled Breath Analysis. *J Breath Res* **2017**, *11*, 046004.
5. García-Gómez, D.; Martínez-Lozano Sinues, P.; Barrios-Collado, C.; Vidal-de-Miguel, G.; Gaugg, M.; Zenobi, R. Identification of 2-Alkenals, 4-Hydroxy-2-Alkenals, and 4-Hydroxy-2,6-Alkadienals in Exhaled Breath Condensate by UHPLC-HRMS and in Breath by Real-Time HRMS. *Anal Chem* **2015**, *87*, 3087–3093.
6. Singh, K.D.; Tancev, G.; Decrue, F.; Usemann, J.; Appenzeller, R.; Barreiro, P.; Jaumà, G.; Macia Santiago, M.; Vidal de Miguel, G.; Frey, U.; et al. Standardization Procedures for Real-Time Breath Analysis by Secondary Electrospray Ionization High-Resolution Mass Spectrometry. *Anal Bioanal Chem* **2019**, *411*, 4883–4898.
7. Gaugg, M.T.; Bruderer, T.; Nowak, N.; Eifert, L.; Martinez-Lozano Sinues, P.; Kohler, M.; Zenobi, R. Mass-Spectrometric Detection of Omega-Oxidation Products of Aliphatic Fatty Acids in Exhaled Breath. *Anal Chem* **2017**, *89*, 10329–10334.
8. García-Gómez, D.; Gaisl, T.; Bregy, L.; Cremonesi, A.; Sinues, P.M.-L.; Kohler, M.; Zenobi, R. Real-Time Quantification of Amino Acids in the Exhalome by Secondary Electrospray Ionization–Mass Spectrometry: A Proof-of-Principle Study. *Clin Chem* **2016**, *62*, 1230–1237.
9. Rioseras, A.T.; Singh, K.D.; Nowak, N.; Gaugg, M.T.; Bruderer, T.; Zenobi, R.; Sinues, P.M.-L. Real-Time Monitoring of Tricarboxylic Acid Metabolites in Exhaled Breath. *Anal Chem* **2018**, *90*, 6453–6460.
10. Martinez-Lozano Sinues, P.; Meier, L.; Berchtold, C.; Ivanov, M.; Sievi, N.; Camen, G.; Kohler, M.; Zenobi, R. Breath Analysis in Real Time by Mass Spectrometry in Chronic Obstructive Pulmonary Disease. *Respiration* **2014**, *87*, 301–310.
11. Nowak, N.; Gaisl, T.; Miladinovic, D.; Marcinkevics, R.; Osswald, M.; Bauer, S.; Buhmann, J.; Zenobi, R.; Sinues, P.; Brown, S.A.; et al. Rapid and Reversible Control of Human Metabolism by Individual Sleep States. *Cell Rep* **2021**, *37*.
12. Martínez-Lozano, P.; Zingaro, L.; Finiguerra, A.; Cristoni, S. Secondary Electrospray Ionization–Mass Spectrometry: Breath Study on a Control Group. *J Breath Res* **2011**, *5*, 016002.
13. Gaugg, M.T.; Nussbaumer-Ochsner, Y.; Bregy, L.; Engler, A.; Stebler, N.; Gaisl, T.; Bruderer, T.; Nowak, N.; Sinues, P.; Zenobi, R.; et al. Real-Time Breath Analysis Reveals Specific Metabolic Signatures of COPD Exacerbations. *Chest* **2019**, *156*, 269–276.
14. Schwarz, E.I.; Martinez-Lozano Sinues, P.; Bregy, L.; Gaisl, T.; Garcia Gomez, D.; Gaugg, M.T.; Suter, Y.; Stebler, N.; Nussbaumer-Ochsner, Y.; Bloch, K.E.; et al. Effects of CPAP Therapy Withdrawal on Exhaled Breath Pattern in Obstructive Sleep Apnoea. *Thorax* **2016**, *71*, 110.
15. García-Gómez, D.; Gaisl, T.; Bregy, L.; Martínez-Lozano Sinues, P.; Kohler, M.; Zenobi, R. Secondary Electrospray Ionization Coupled to High-Resolution Mass Spectrometry Reveals Tryptophan Pathway Metabolites in Exhaled Human Breath. *Chemical Communications* **2016**, *52*, 8526–8528.

16. Keller, B.O.; Sui, J.; Young, A.B.; Whittal, R.M. Interferences and Contaminants Encountered in Modern Mass Spectrometry. *Anal Chim Acta* **2008**, 627, 71–81.
